# Supplementary material for: Analysis of 1,000+ Type-Strain Genomes Substantially Improves Taxonomic Classification of Alphaproteobacteria
Source: Front Microbiol. 2020 Apr 7;11:468. doi: 10.3389/fmicb.2020.00468 (PMC7179689; doi:10.3389/fmicb.2020.00468)
Supplement: Supplementary file 2 [file Data_Sheet_1.PDF]

# Analysis of 1,000 Type-Strain Genomes Improves Taxonomic Classification of Alphaproteobacteria

## Supplementary File S2

### List of Figures

|   |                                                                                            |    |
|---|--------------------------------------------------------------------------------------------|----|
| 1 | Complete phylogenomic GBDP tree of the <i>Alphaproteobacteria</i> genome dataset . . . . . | 16 |
| 2 | Backbone-constrained 16S rRNA gene ML tree (CCT) of <i>Alphaproteobacteria</i> . . . . .   | 39 |
| 3 | Unconstrained 16S rRNA gene ML tree (UCT) of <i>Alphaproteobacteria</i> . . . . .          | 60 |
| 4 | Supermatrix-based <i>Labrenzia</i> ML tree . . . . .                                       | 61 |
| 5 | Supermatrix-based <i>Sphingomonadales</i> ML tree . . . . .                                | 62 |

## Abbreviations

**CCT** constrained, comprehensive tree inferred with ML and MP using the bipartitions of the GBDP tree with  $\geq 95\%$  support as backbone constraint

**GBDP** Genome BLAST Distance Phylogeny

**ML** Maximum Likelihood

**UCT** unconstrained, comprehensive 16S rRNA gene tree

### Type species

- ☐ no
- ☐ yes

### Phylum

- ☐ *Proteobacteria*
- ☐ *Spirochaetes-Phylum*

### Class

- ☐ *Alphaproteobacteria*
- ☐ *Mariprofundia*
- ☐ *Spirochaetes*

### Order

- ☐ *Brachyspirales*
- ☐ *Brevinematales*
- ☐ *Caulobacterales*
- ☐ *Emcibacterales*
- ☐ *Kiloniellales*
- ☐ *Kordiimonadales*
- ☐ *Leptospirales*
- ☐ *Magnetococcales*
- ☐ *Mariprofundales*
- ☐ *Parvularculales*
- ☐ *Rhizobiales*
- ☐ *Rhodobacterales*
- ☐ *Rhodospirillales*
- ☐ *Rhodothalassiales*
- ☐ *Rickettsiales*
- ☐ *Sneathiellales*
- ☐ *Sphingomonadales*
- ☐ *Spirochaetales*
- ☐ NA

### Family

- ☐ *Acetobacteraceae*
- ☐ *Anaplasmataceae*
- ☐ *Aurantimonadaceae*
- ☐ *Bartonellaceae*
- ☐ *Beijerinckiaceae*
- ☐ *Borreliaceae*
- ☐ *Brachyspiraceae*
- ☐ *Bradyrhizobiaceae*
- ☐ *Brevinemataceae*
- ☐ *Brucellaceae*
- ☐ *Caulobacteraceae*
- ☐ *Chelatococcaceae*
- ☐ *Cohaesibacteraceae*
- ☐ *Emcibacteraceae*
- ☐ *Erythrobacteraceae*
- ☐ *Geminicoccaceae*
- ☐ *Hyphomicrobiaceae*
- ☐ *Hyphomonadaceae*
- ☐ *Kiloniellaceae*
- ☐ *Kordiimonadaceae*
- ☐ *Leptospiraceae*
- ☐ *Magnetococcaceae*
- ☐ *Mariprofundaceae*
- ☐ *Methylobacteriaceae*
- ☐ *Methylocystaceae*
- ☐ *Notoacmeibacteraceae*
- ☐ *Parvularculaceae*
- ☐ *Phyllobacteriaceae*
- ☐ *Rhizobiaceae*
- ☐ *Rhodobacteraceae*
- ☐ *Rhodobiaceae*
- ☐ *Rhodospirillaceae*
- ☐ *Rhodothalassiaceae*
- ☐ *Rickettsiaceae*
- ☐ *Roseiarcaceae*
- ☐ *Salinarimonadaceae*
- ☐ *Sneathiellaceae*
- ☐ *Sphingomonadaceae*
- ☐ *Spirochaetaceae*
- ☐ *Xanthobacteraceae*
- ☐ NA

### Cell length

- ☐ Min. (0.5)
- ☐ Max. (125.0)

### Cell width

- ☐ Min. (0.1)
- ☐ Max. (2.1)

### Flagella

- ☐ no
- ☐ yes
- ☐ NA

### Oxygen

- ☐ aerobic
- ☐ anaerobic
- ☐ facultatively aerobic
- ☐ facultatively anaerobic
- ☐ microaerophilic
- ☐ NA

### Carotenoids

- ☐ no
- ☐ yes
- ☐ NA

### Chlorophyll

- ☐ no
- ☐ yes
- ☐ NA

### Ubiquinones

- ☐ Min. (8.0)
- ☐ Max. (11.0)

### Sphingolipids

- ☐ no
- ☐ yes
- ☐ NA

### Percent G+C

- ☐ Min. (26.9)
- ☐ Max. (73.4)

### Sequence length (in bp)

- ☐ Min. (859,006)
- ☐ Max. (9,792,874)

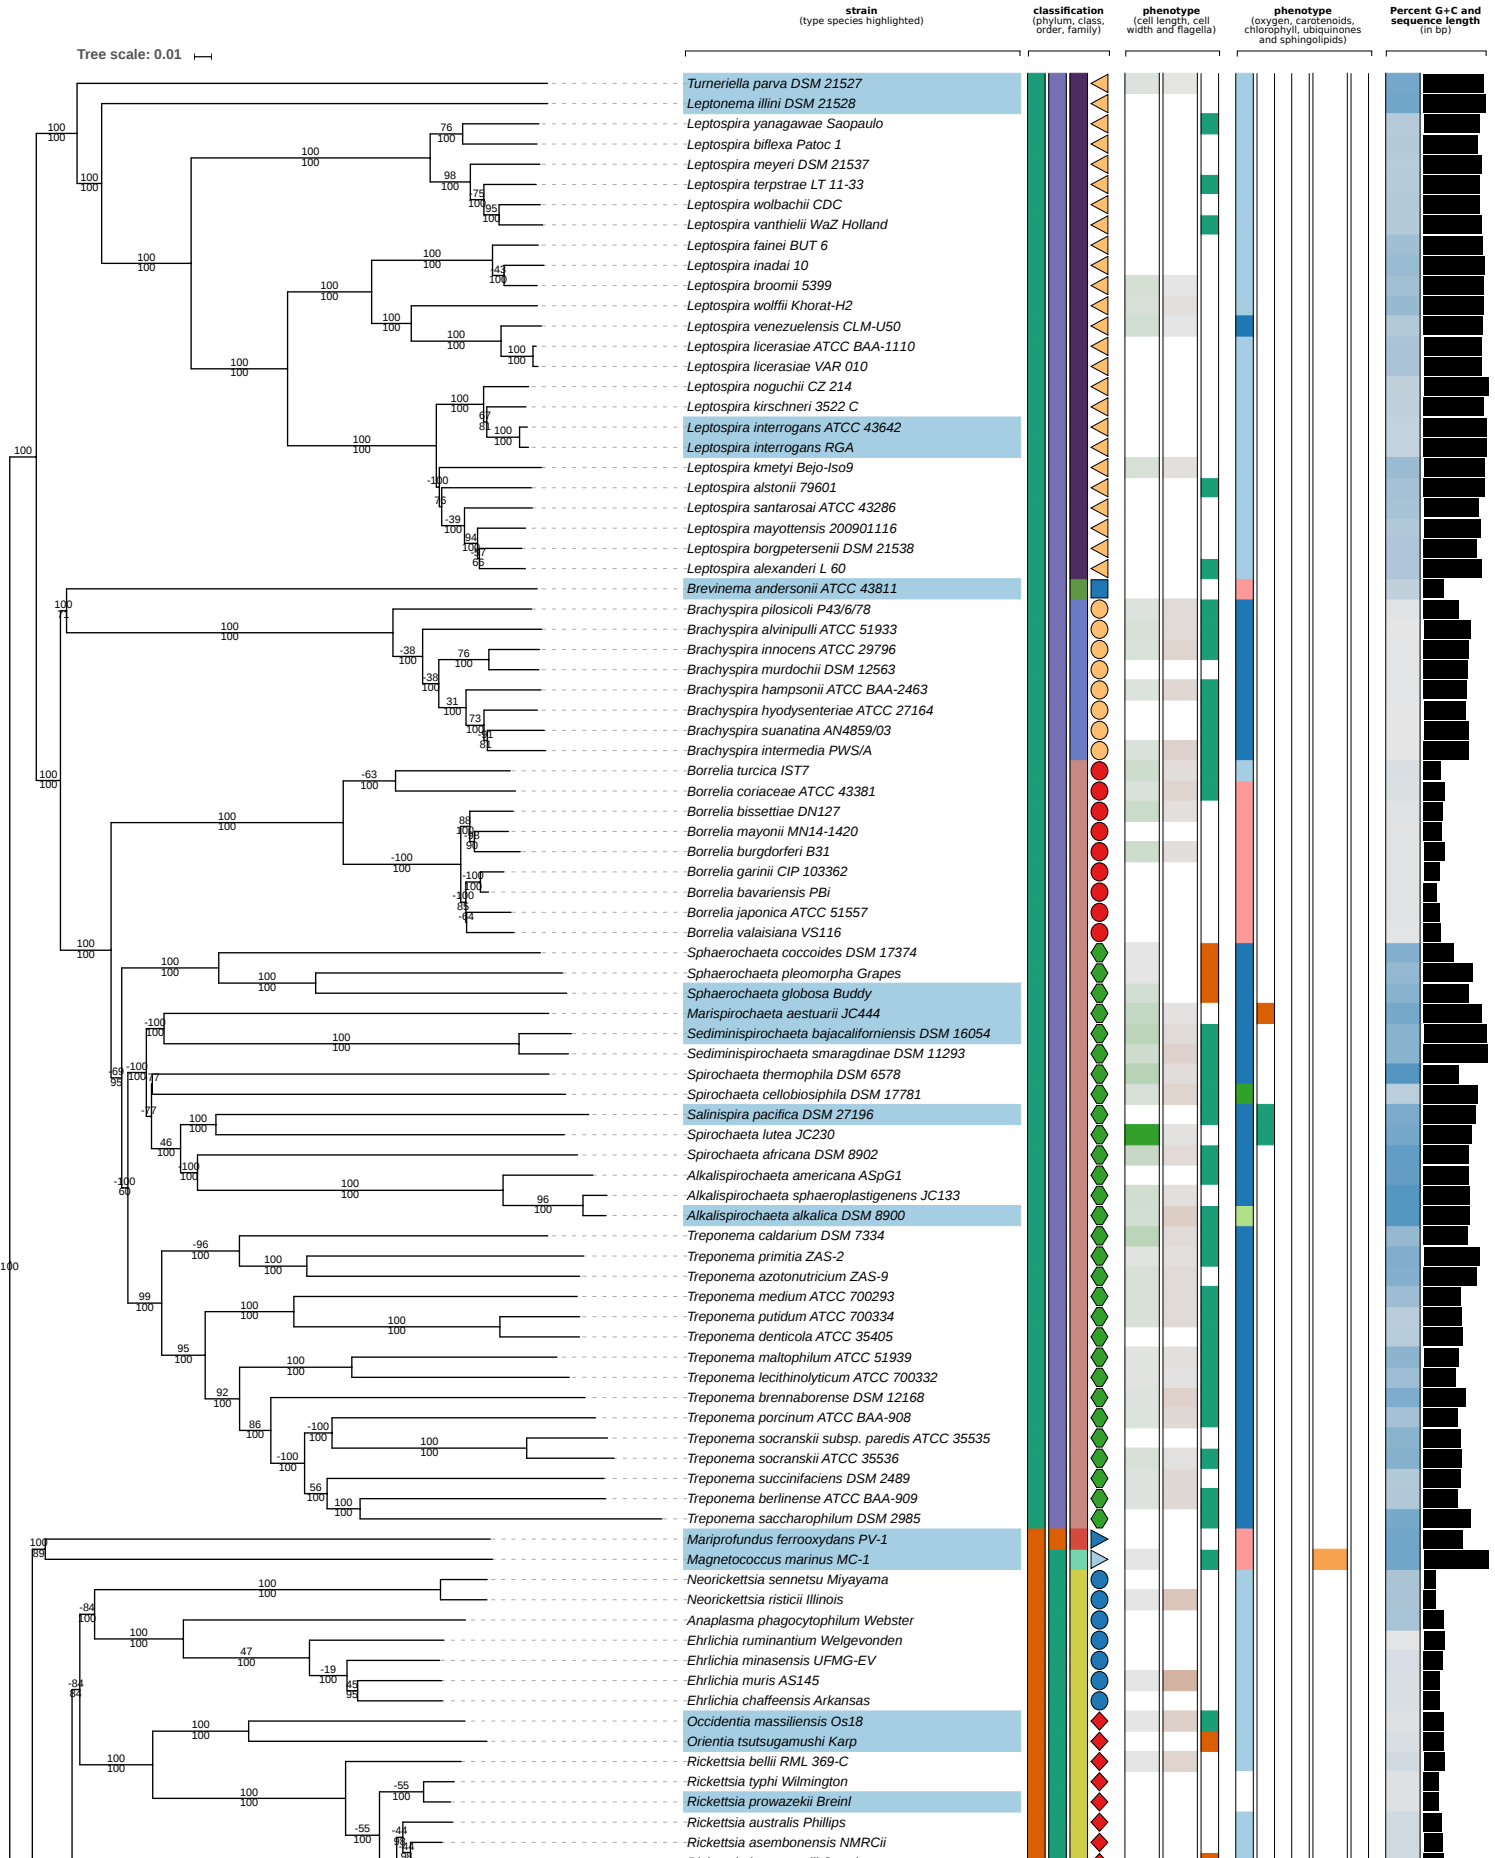

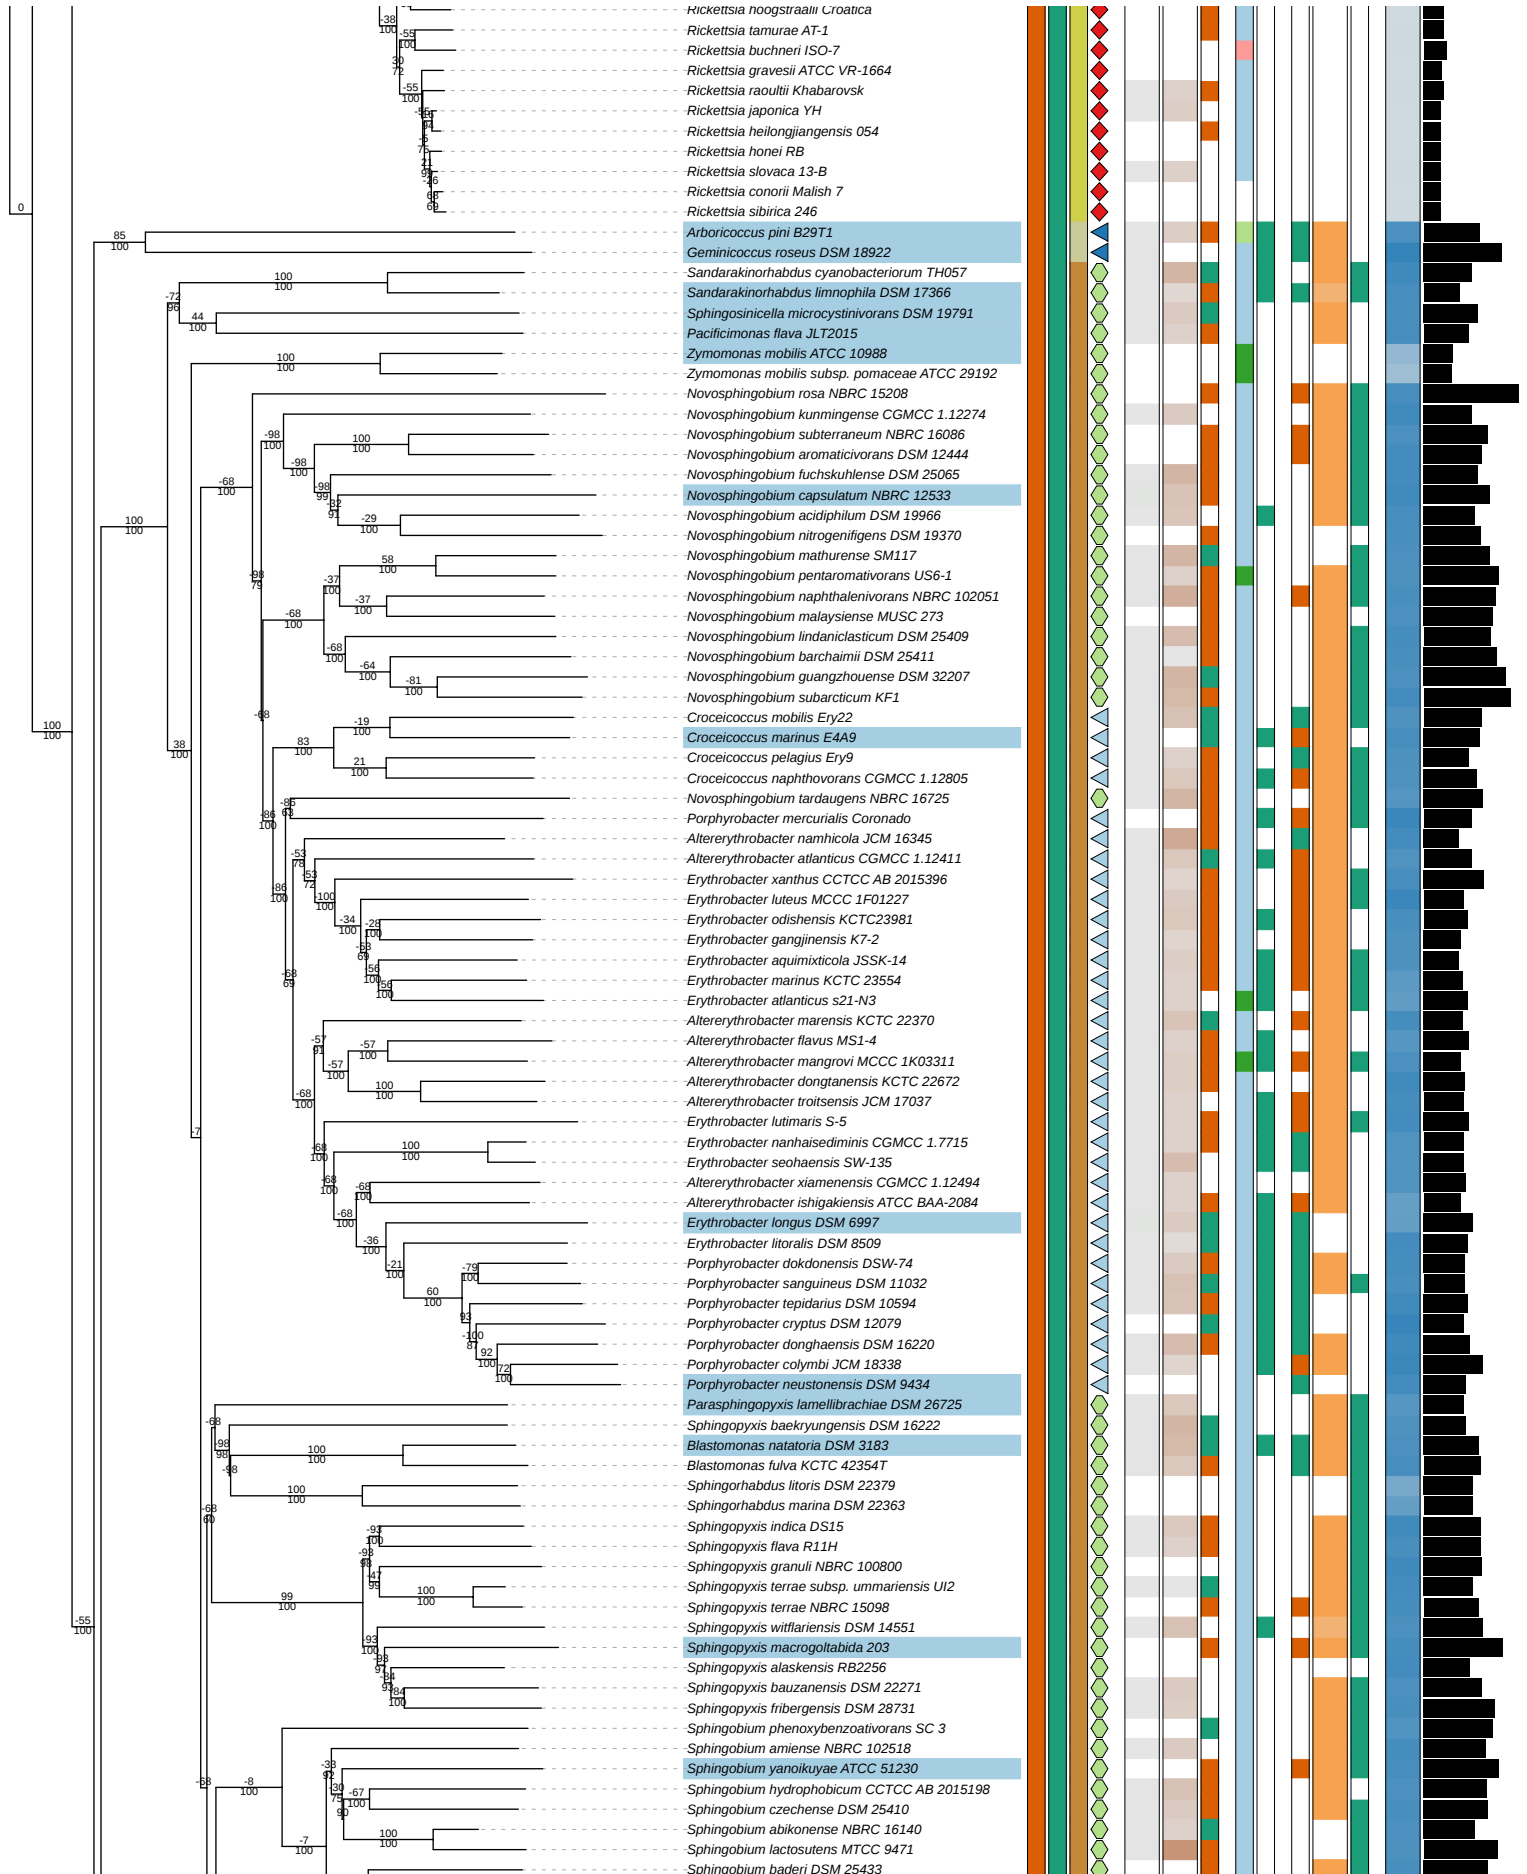

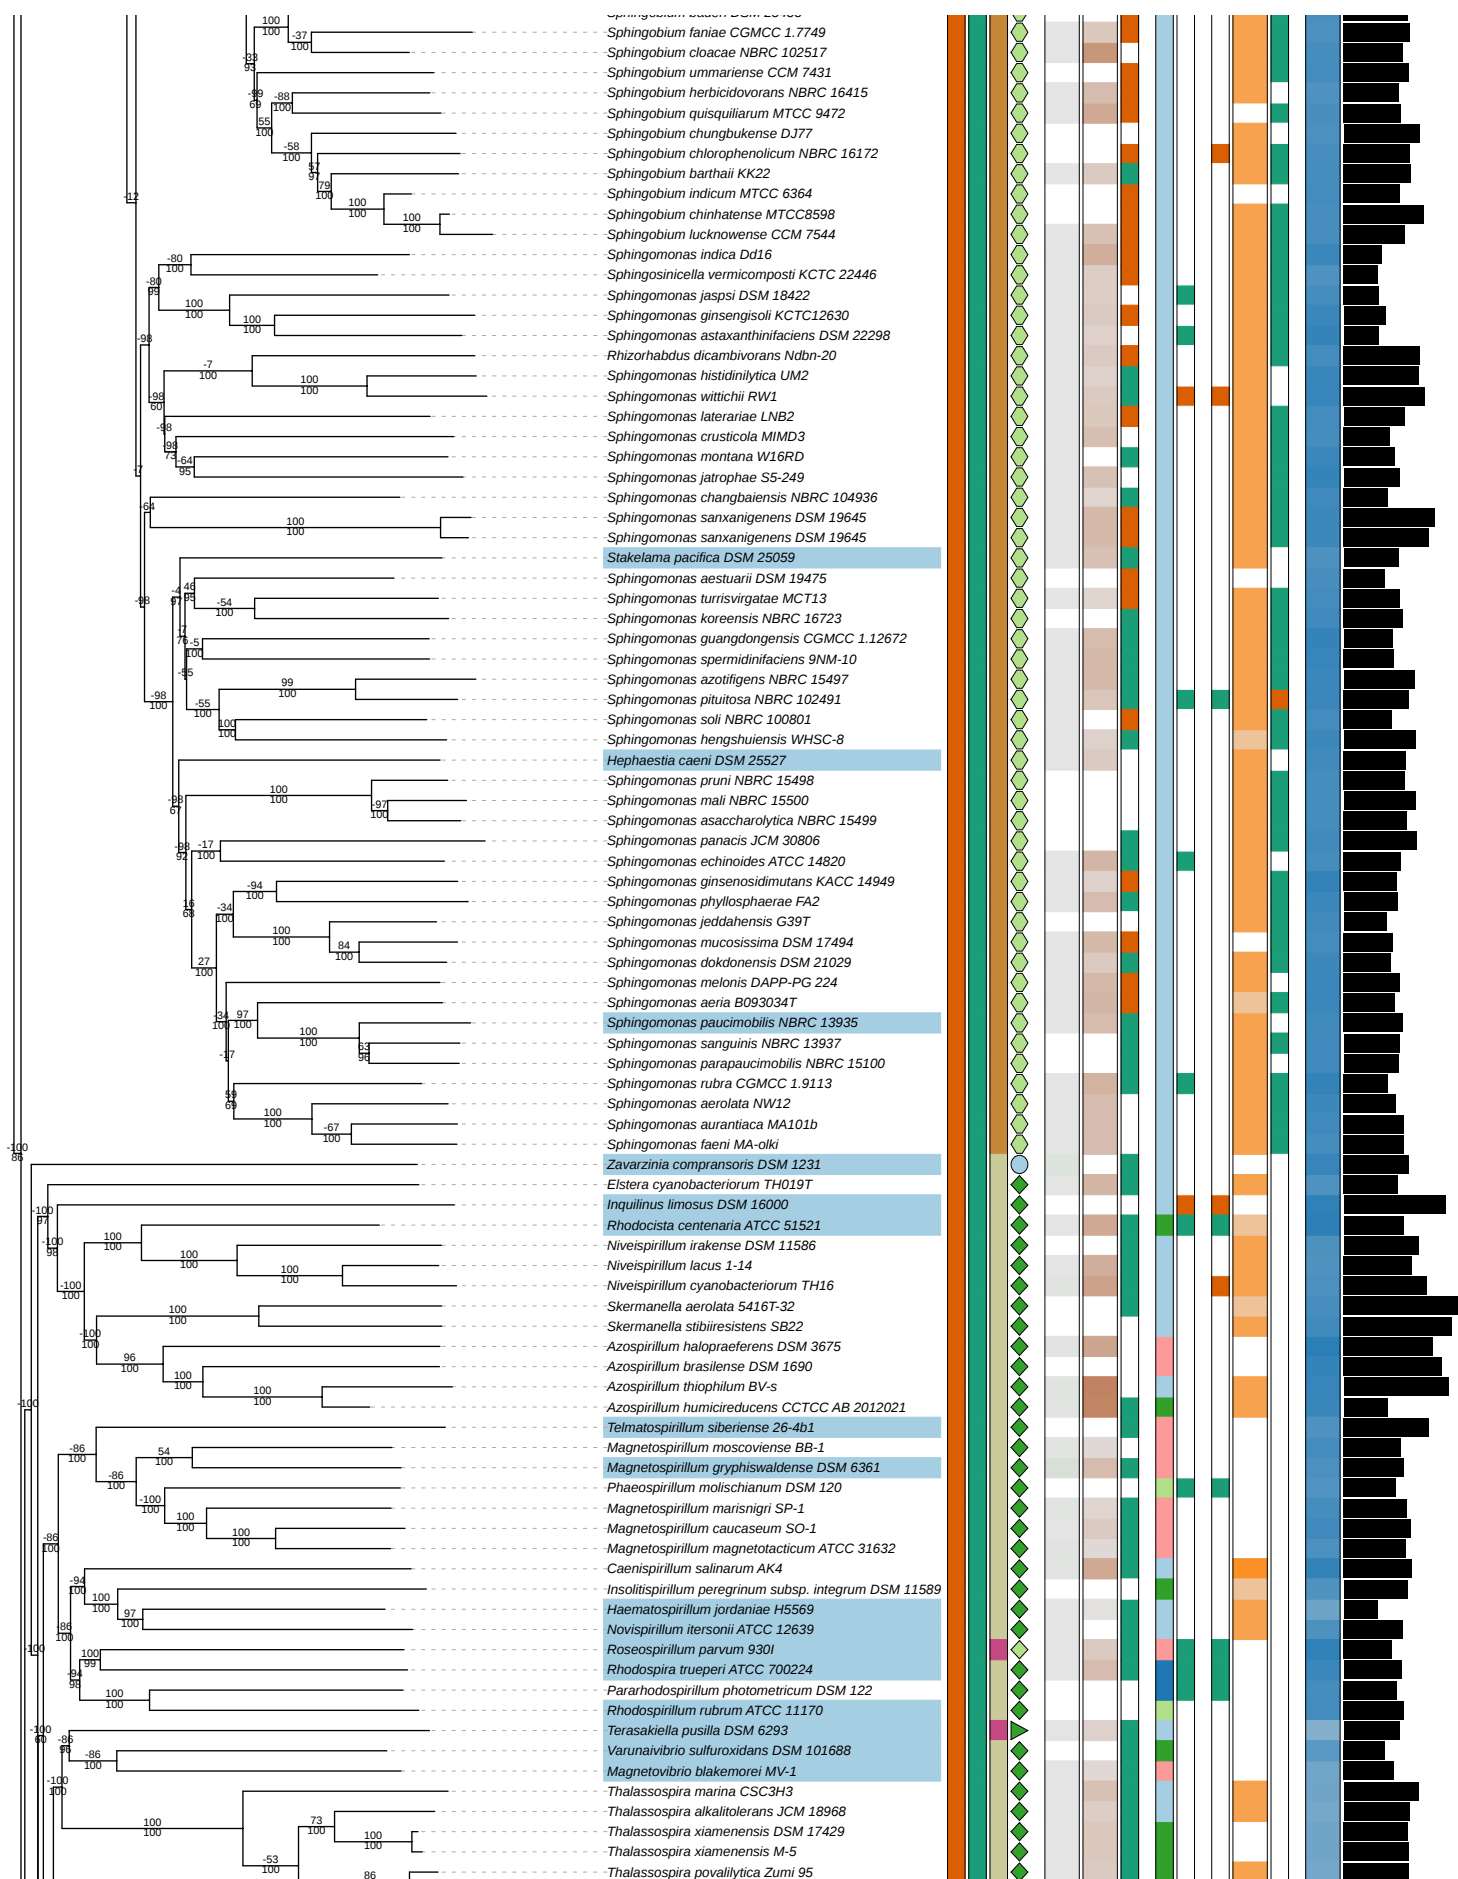

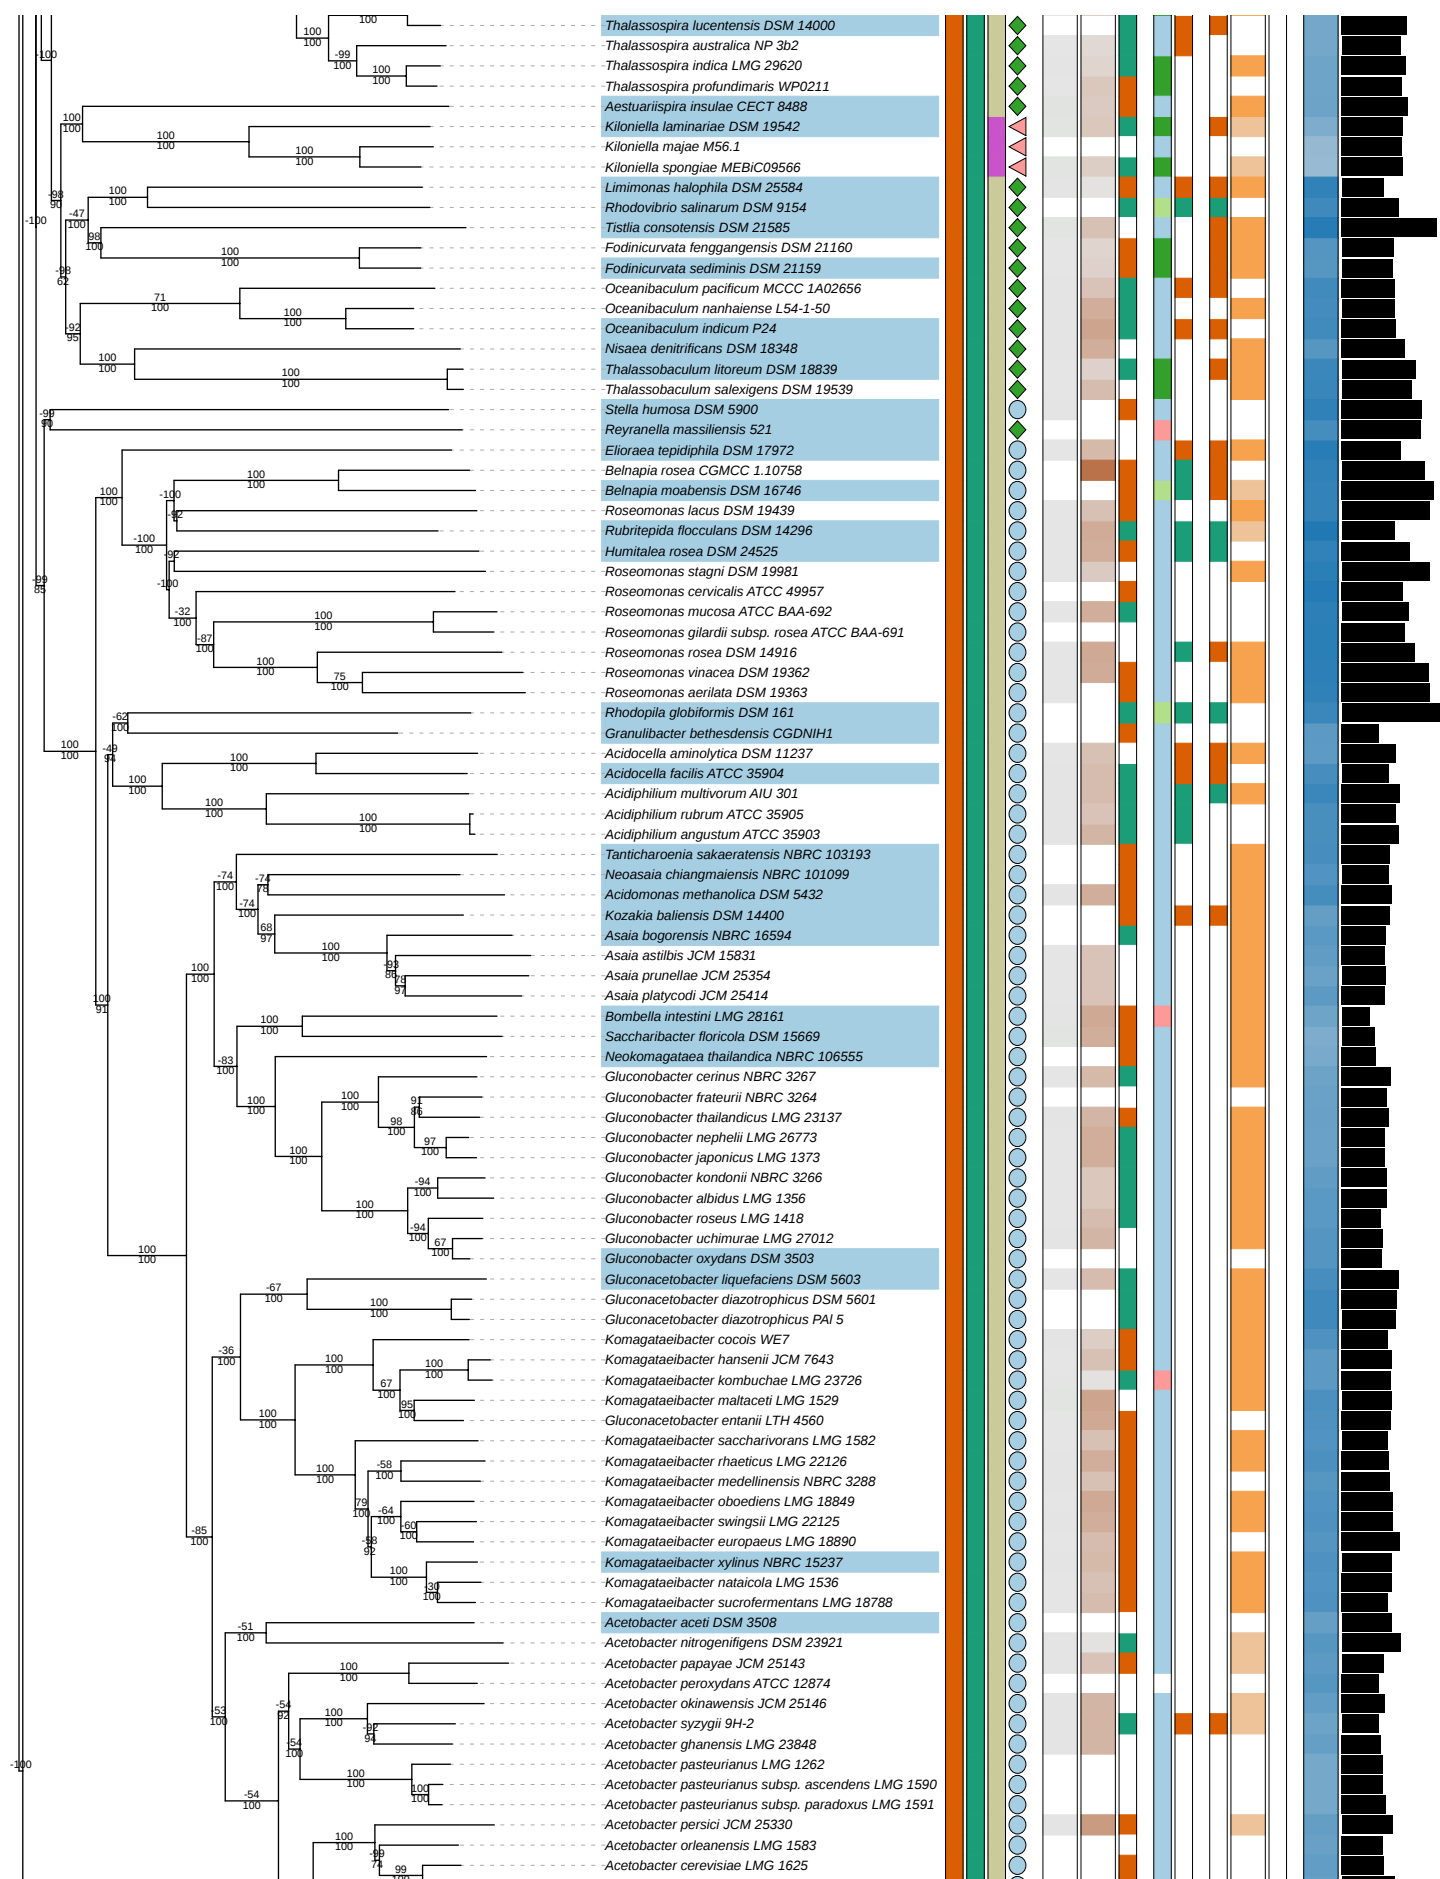

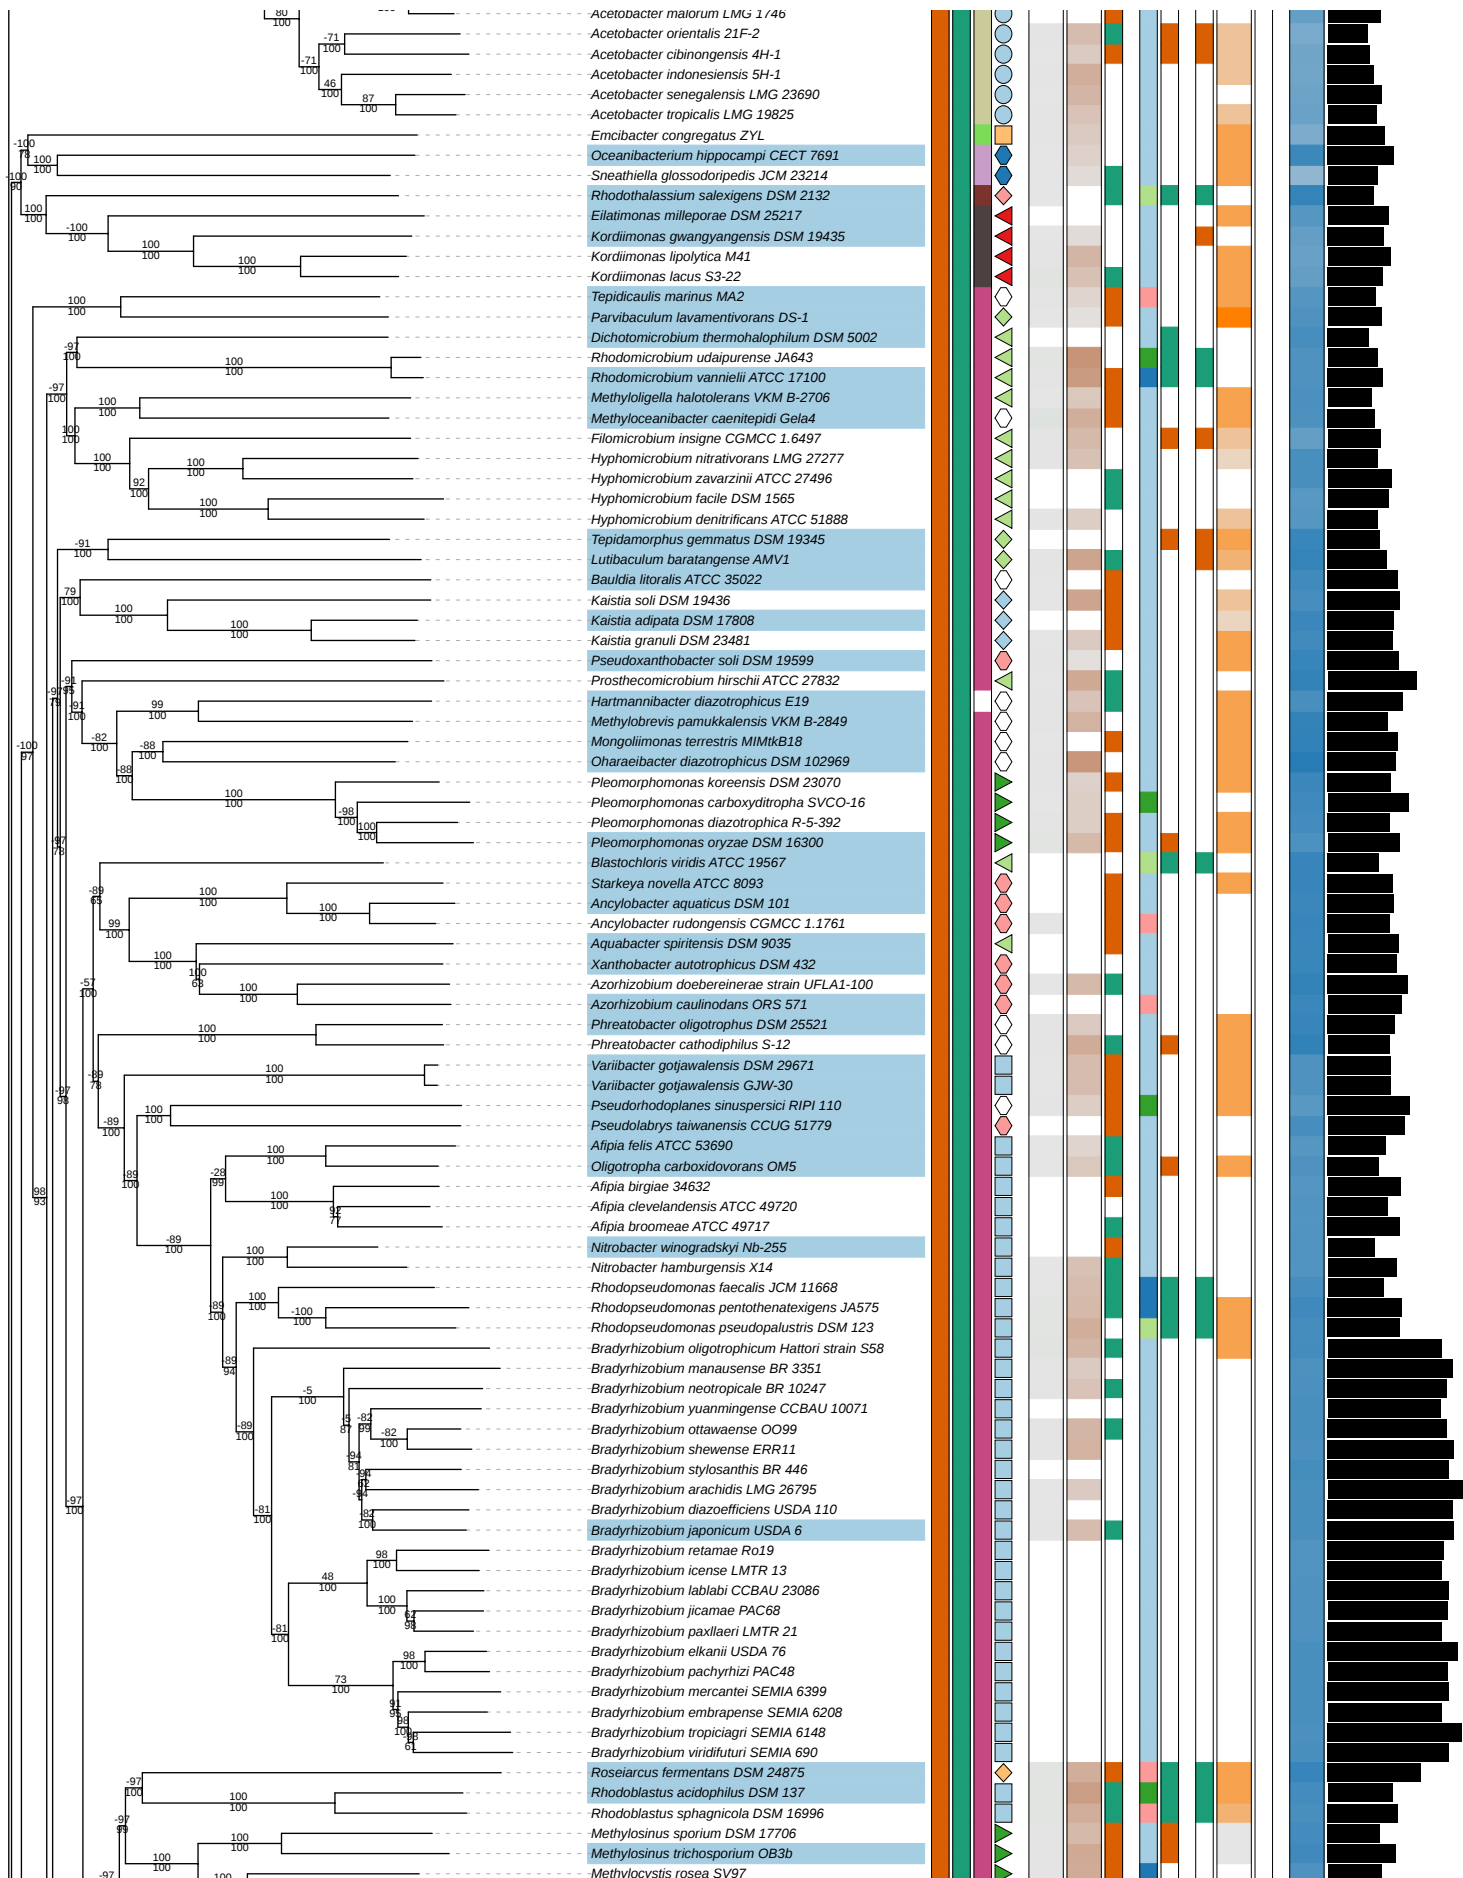

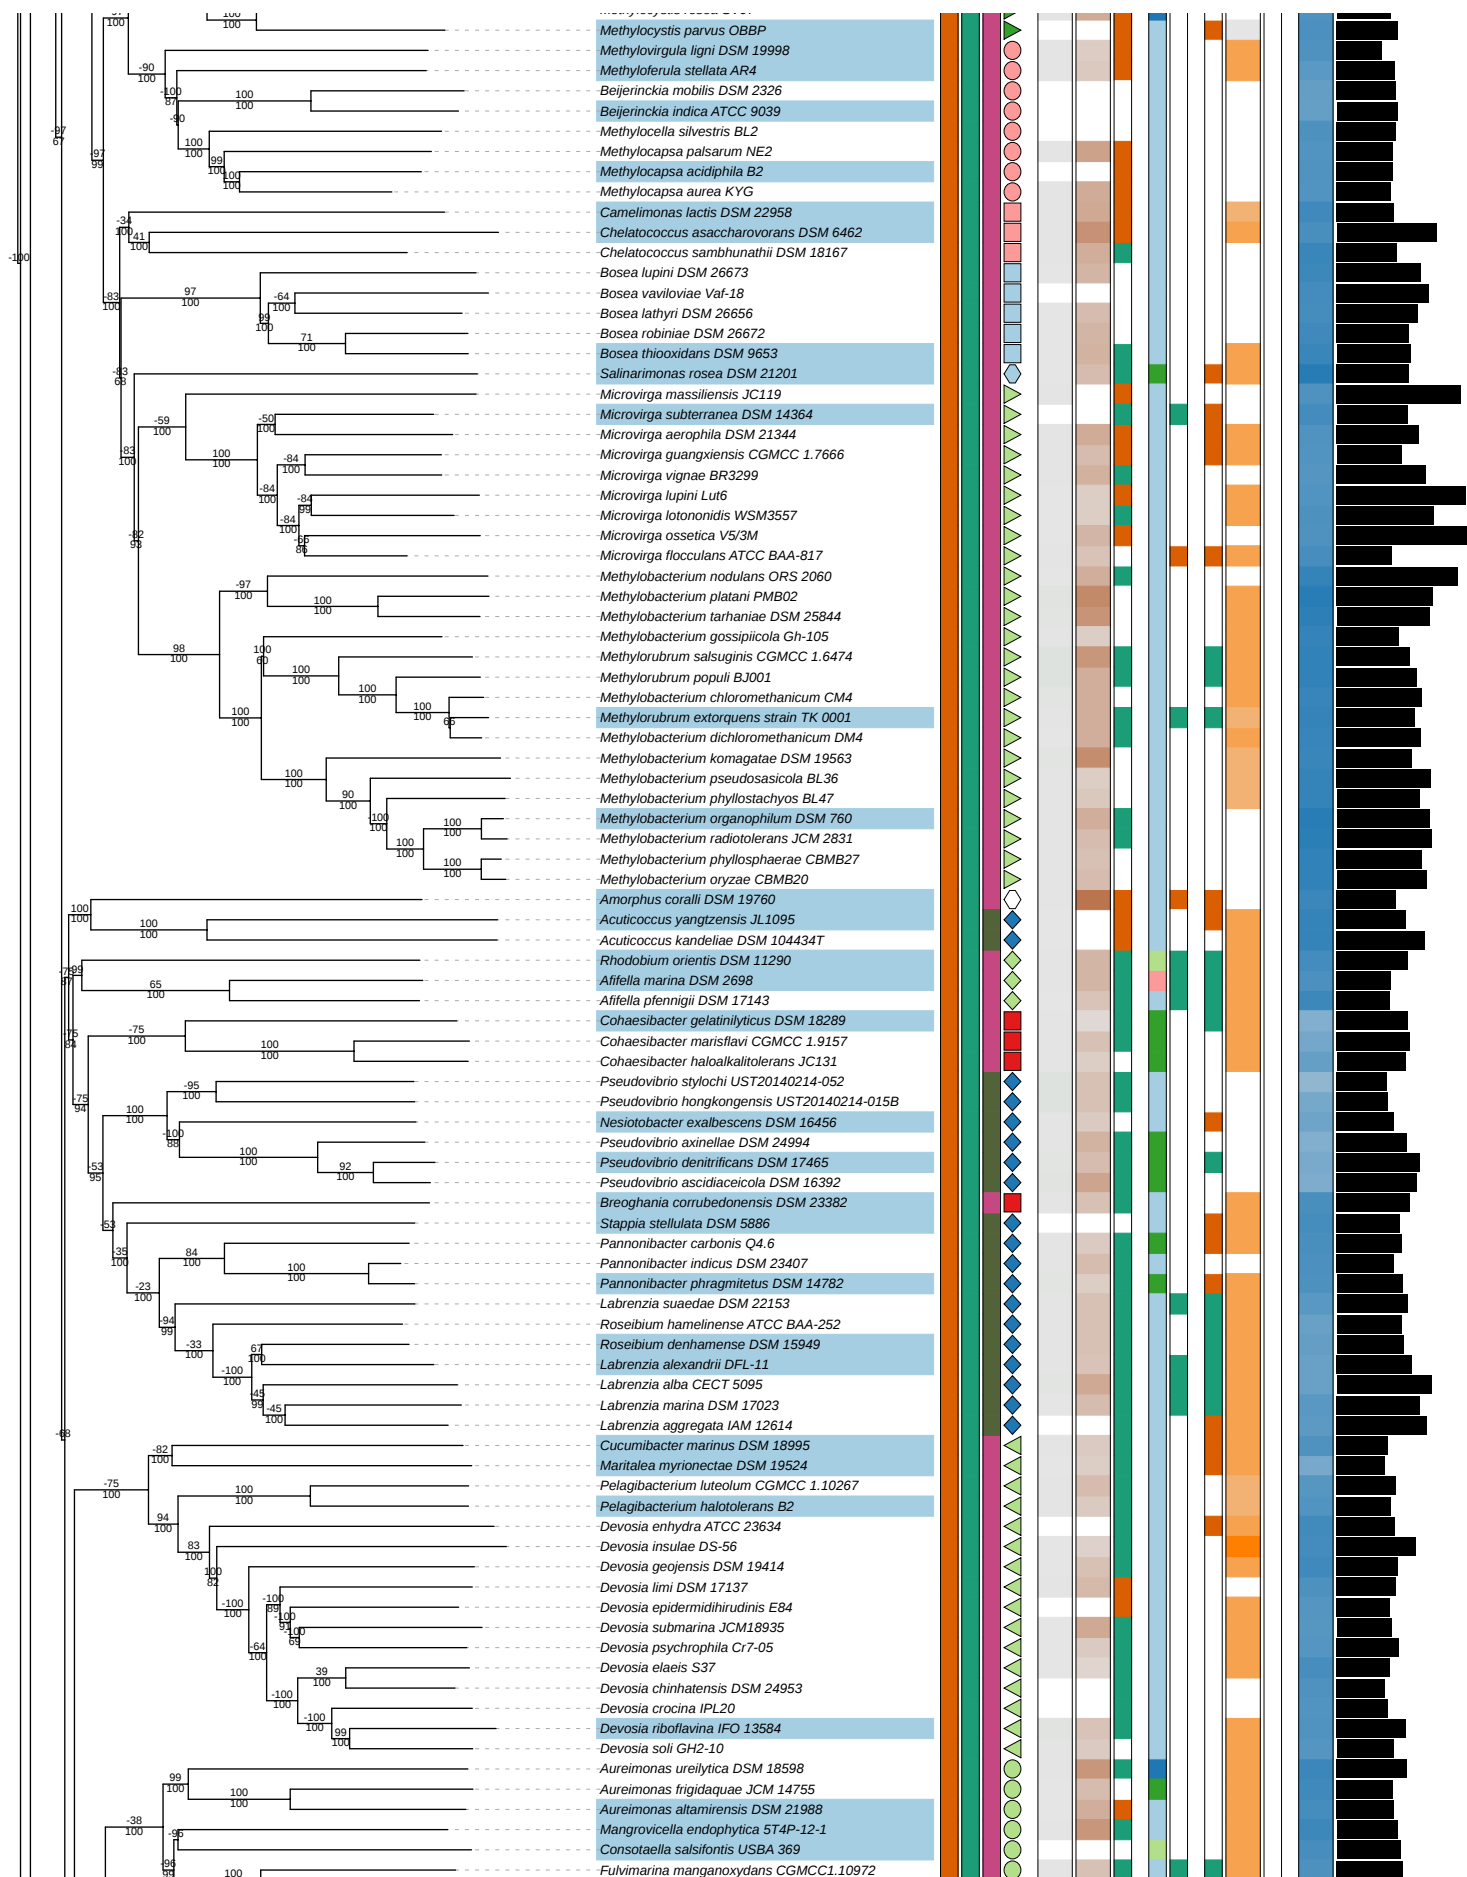

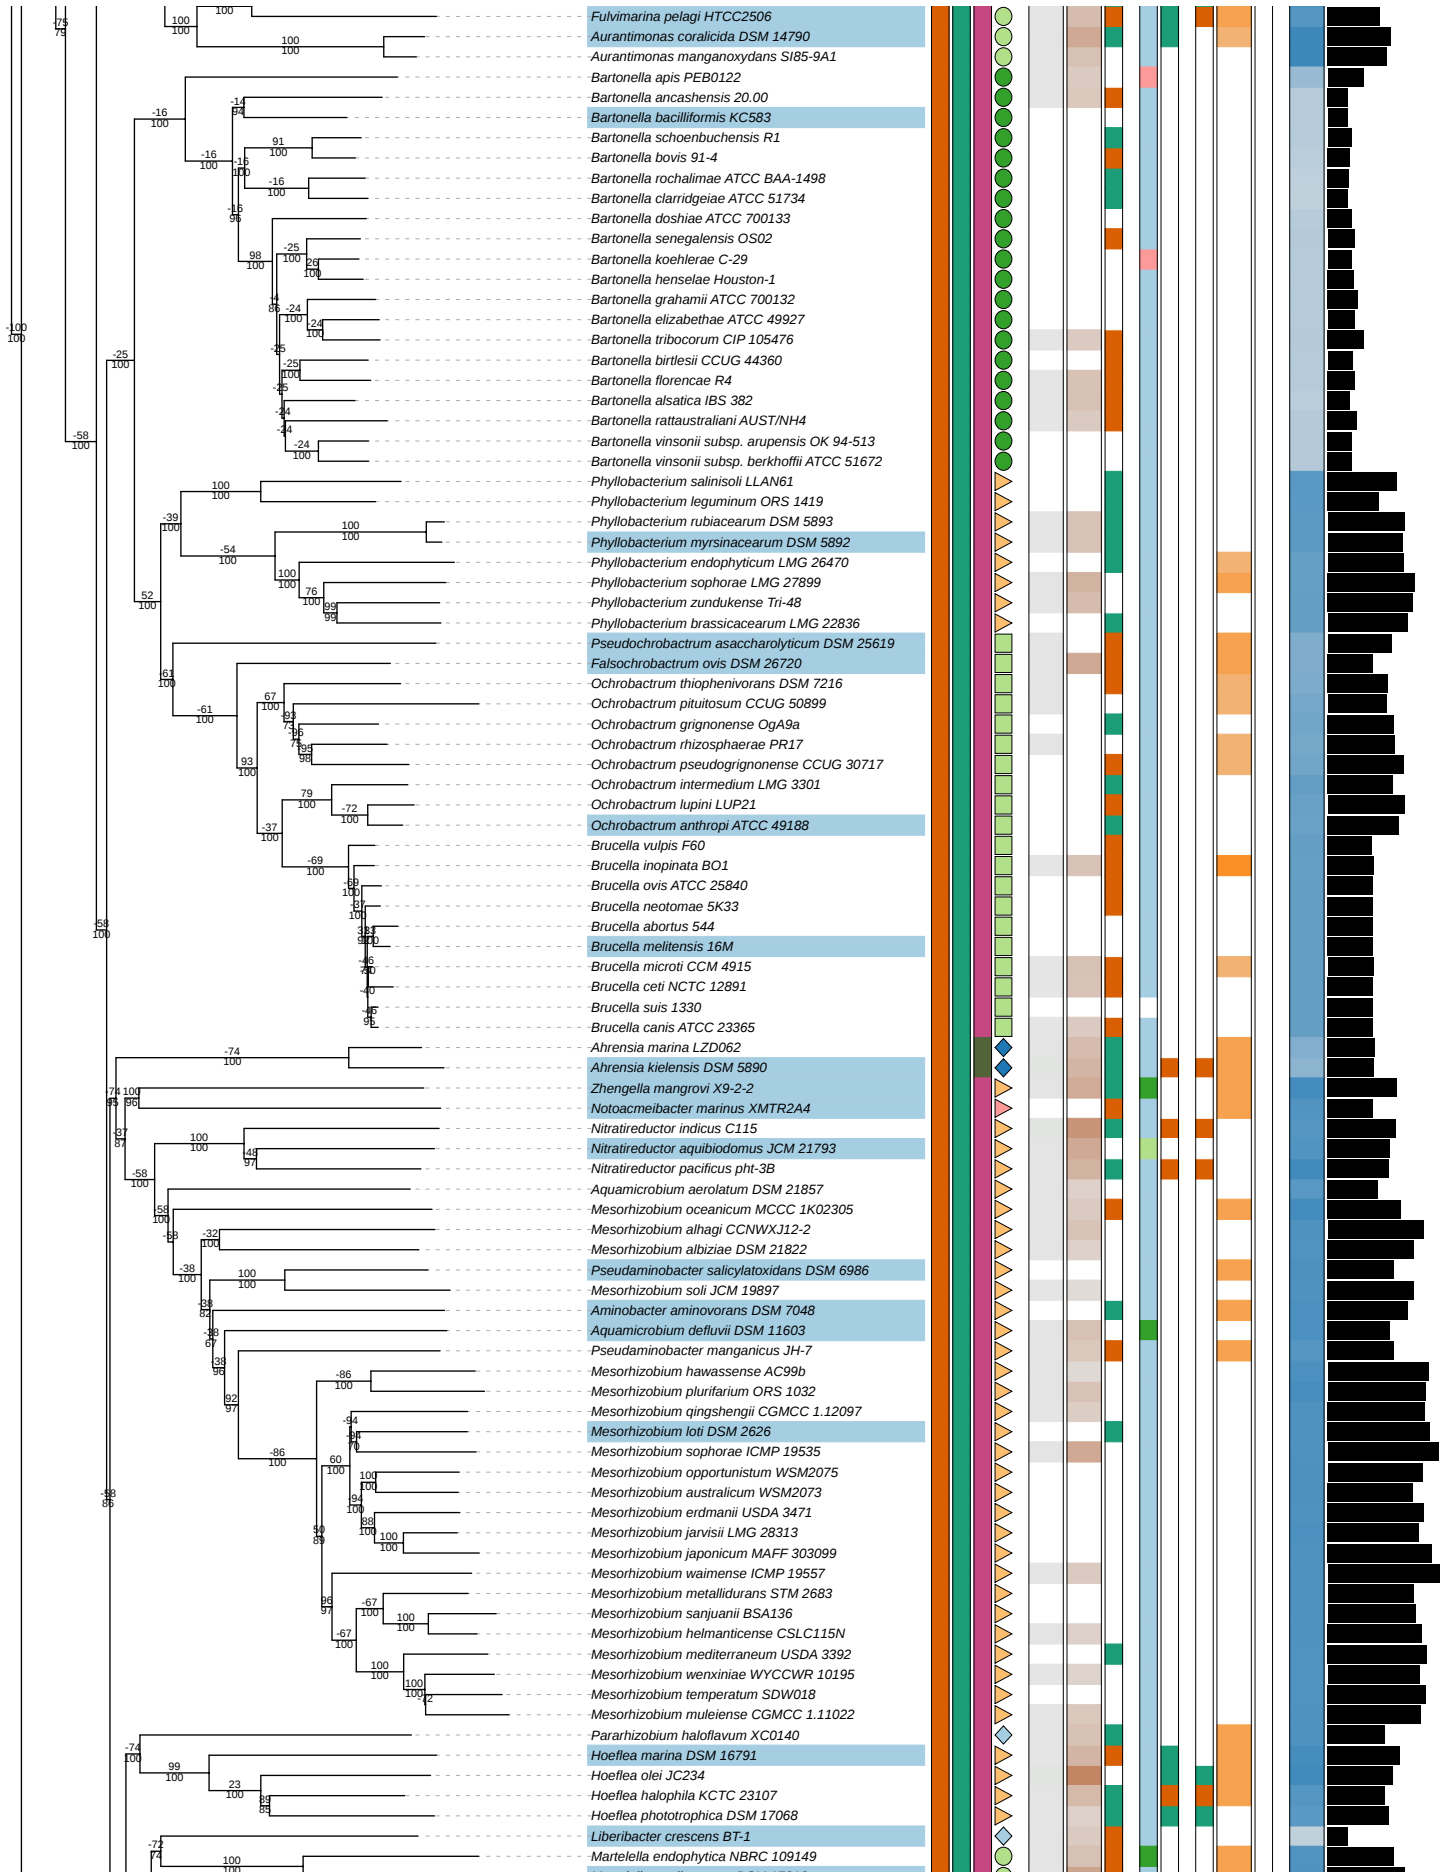

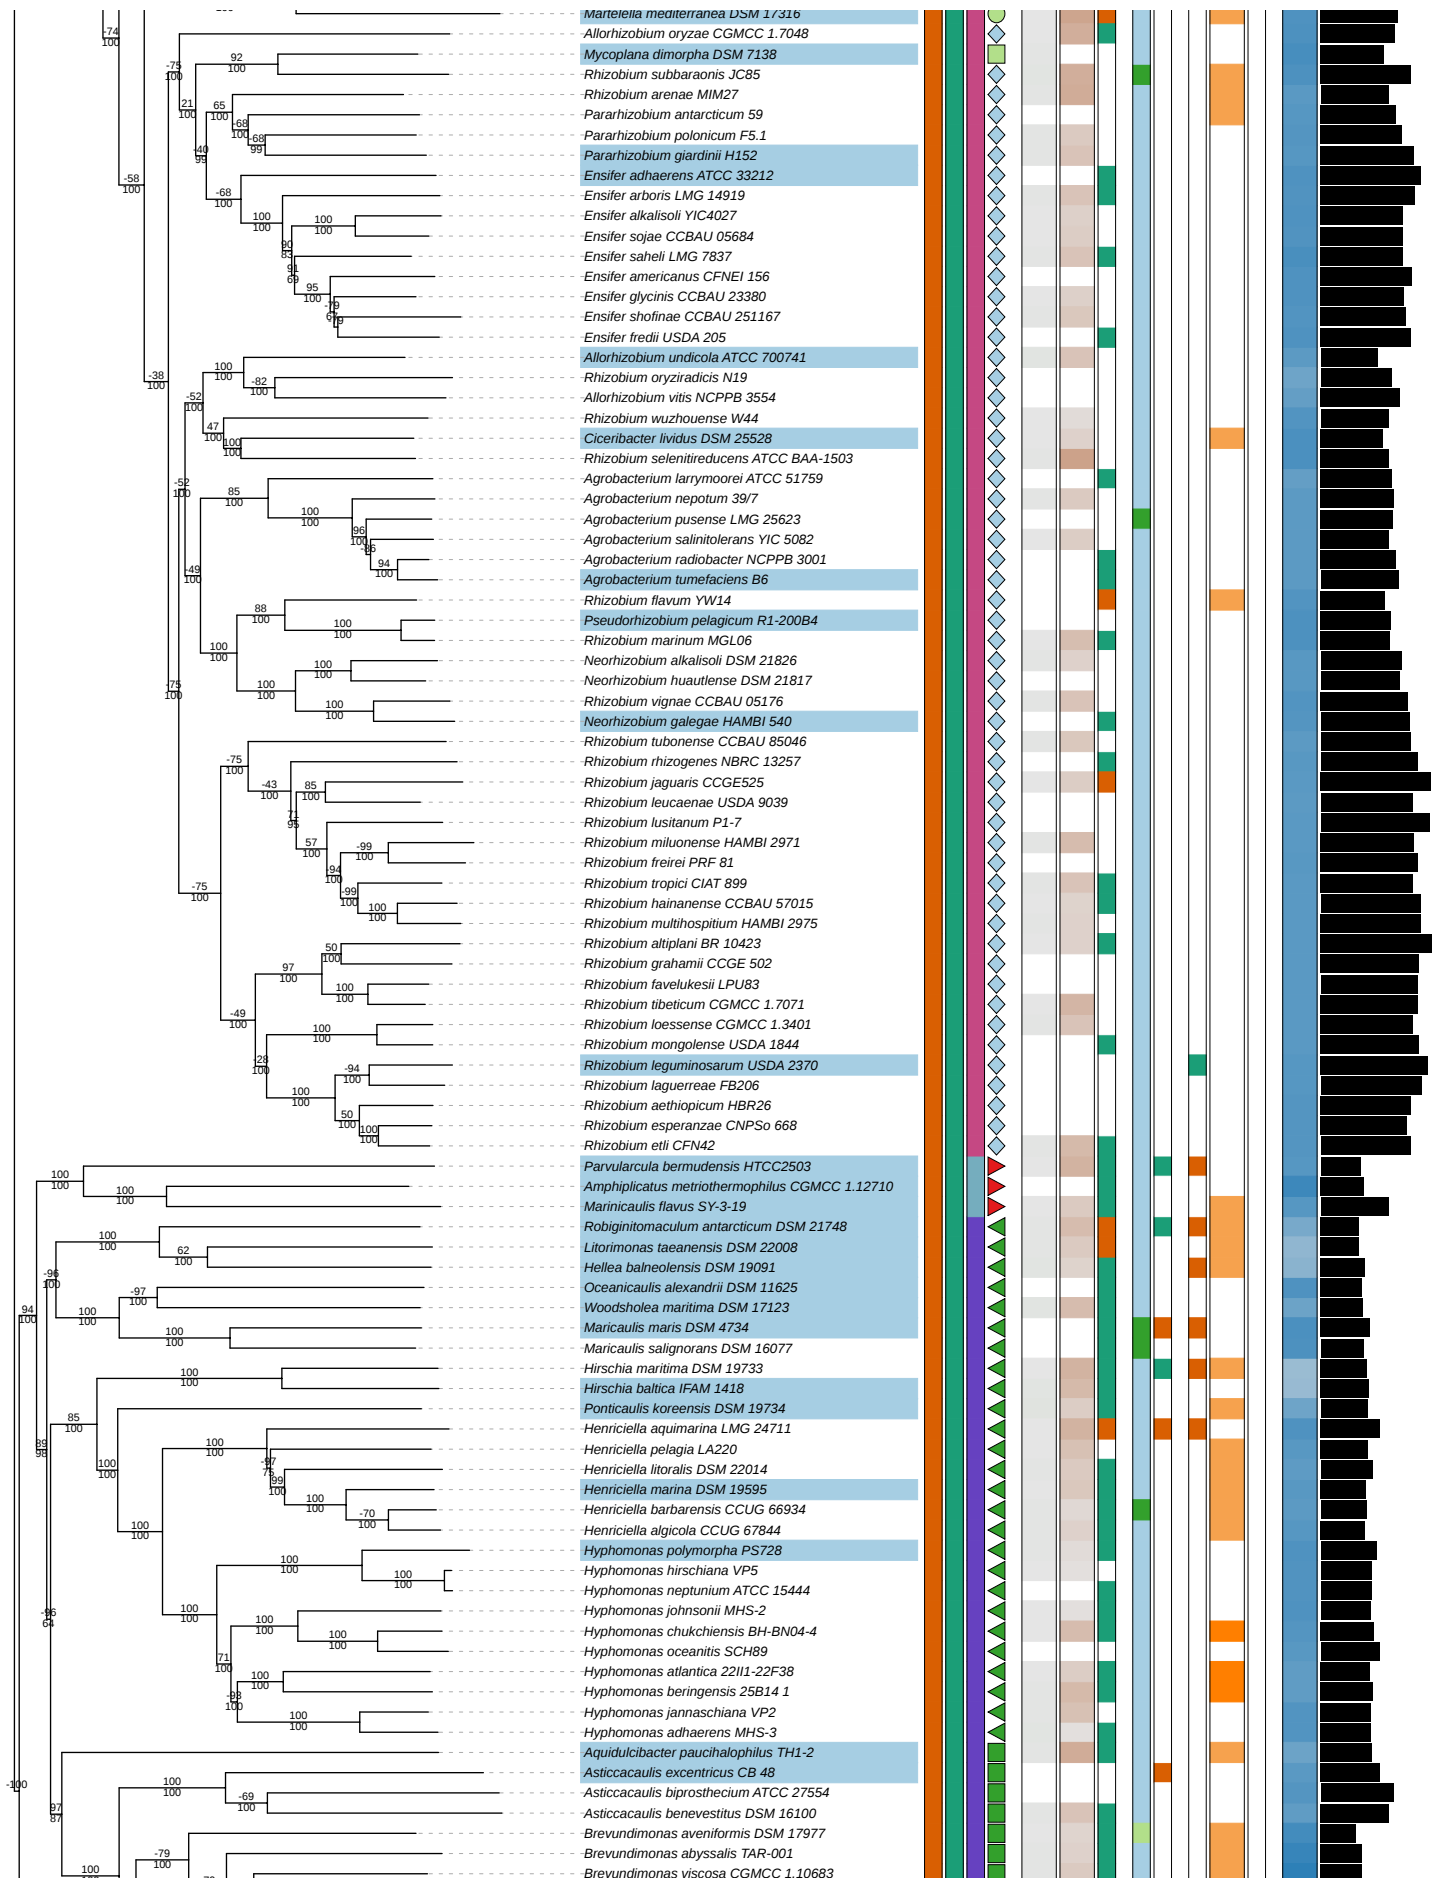

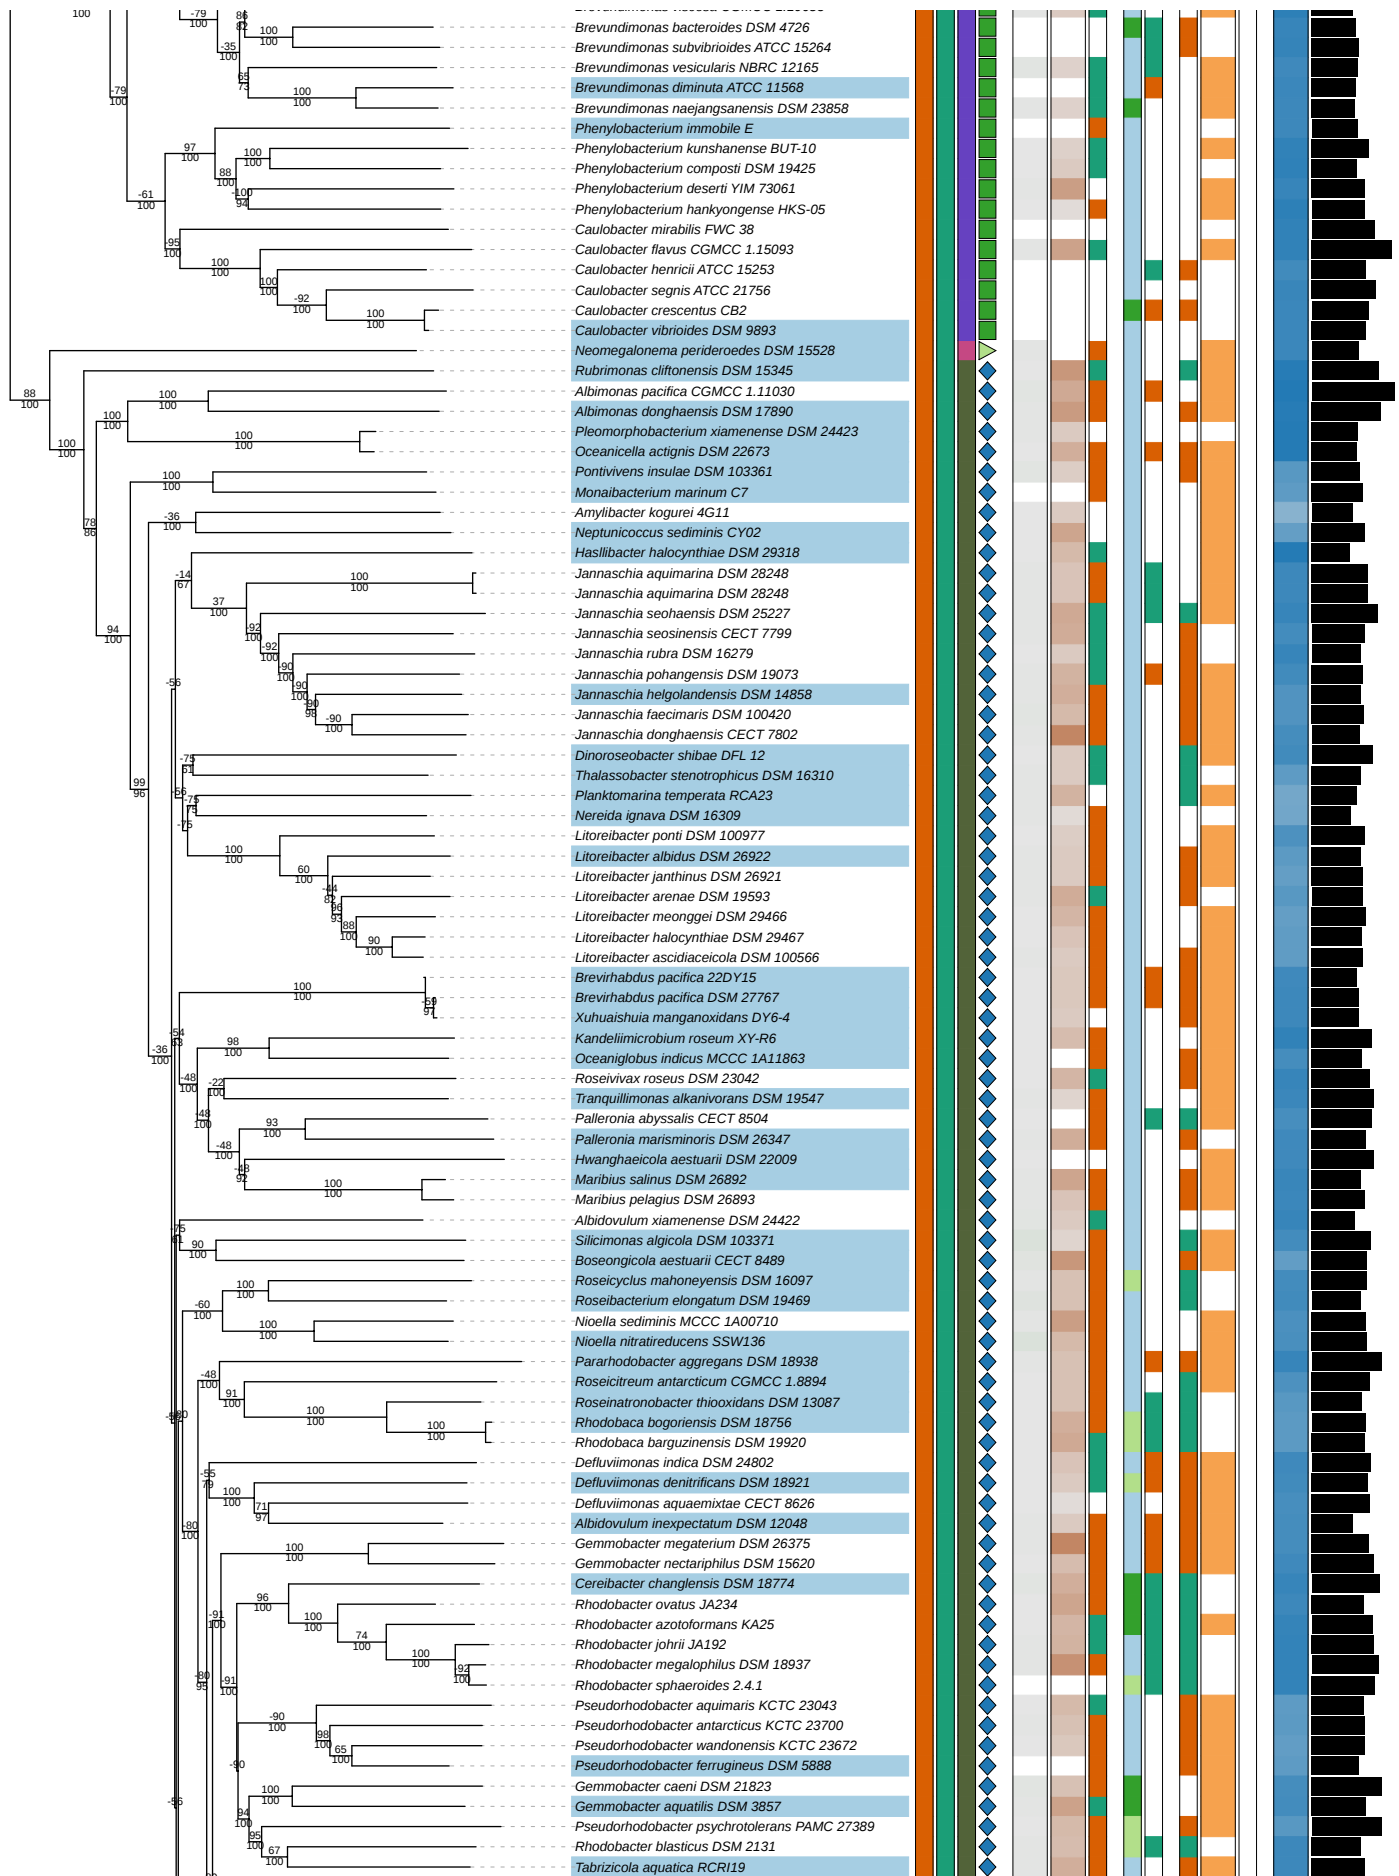

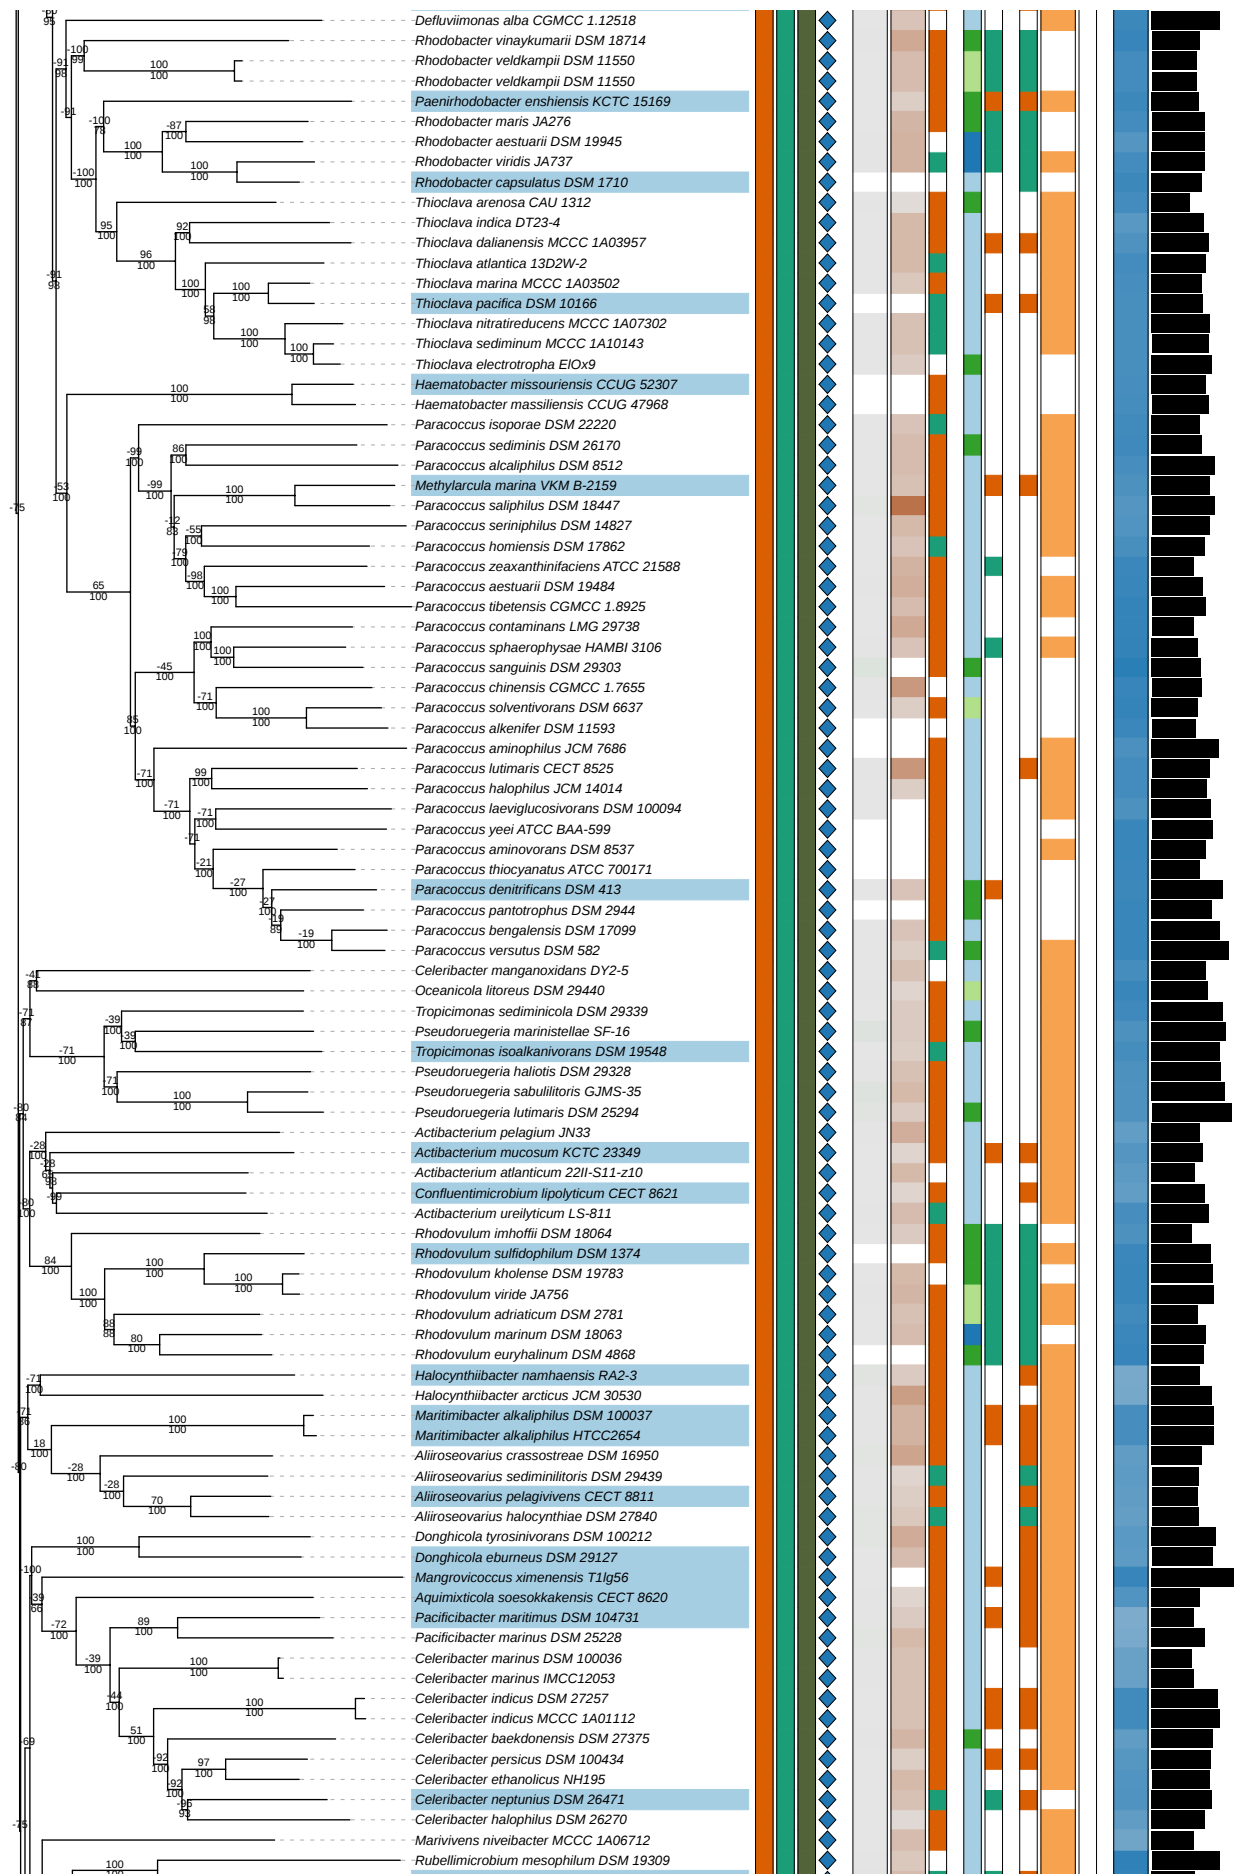

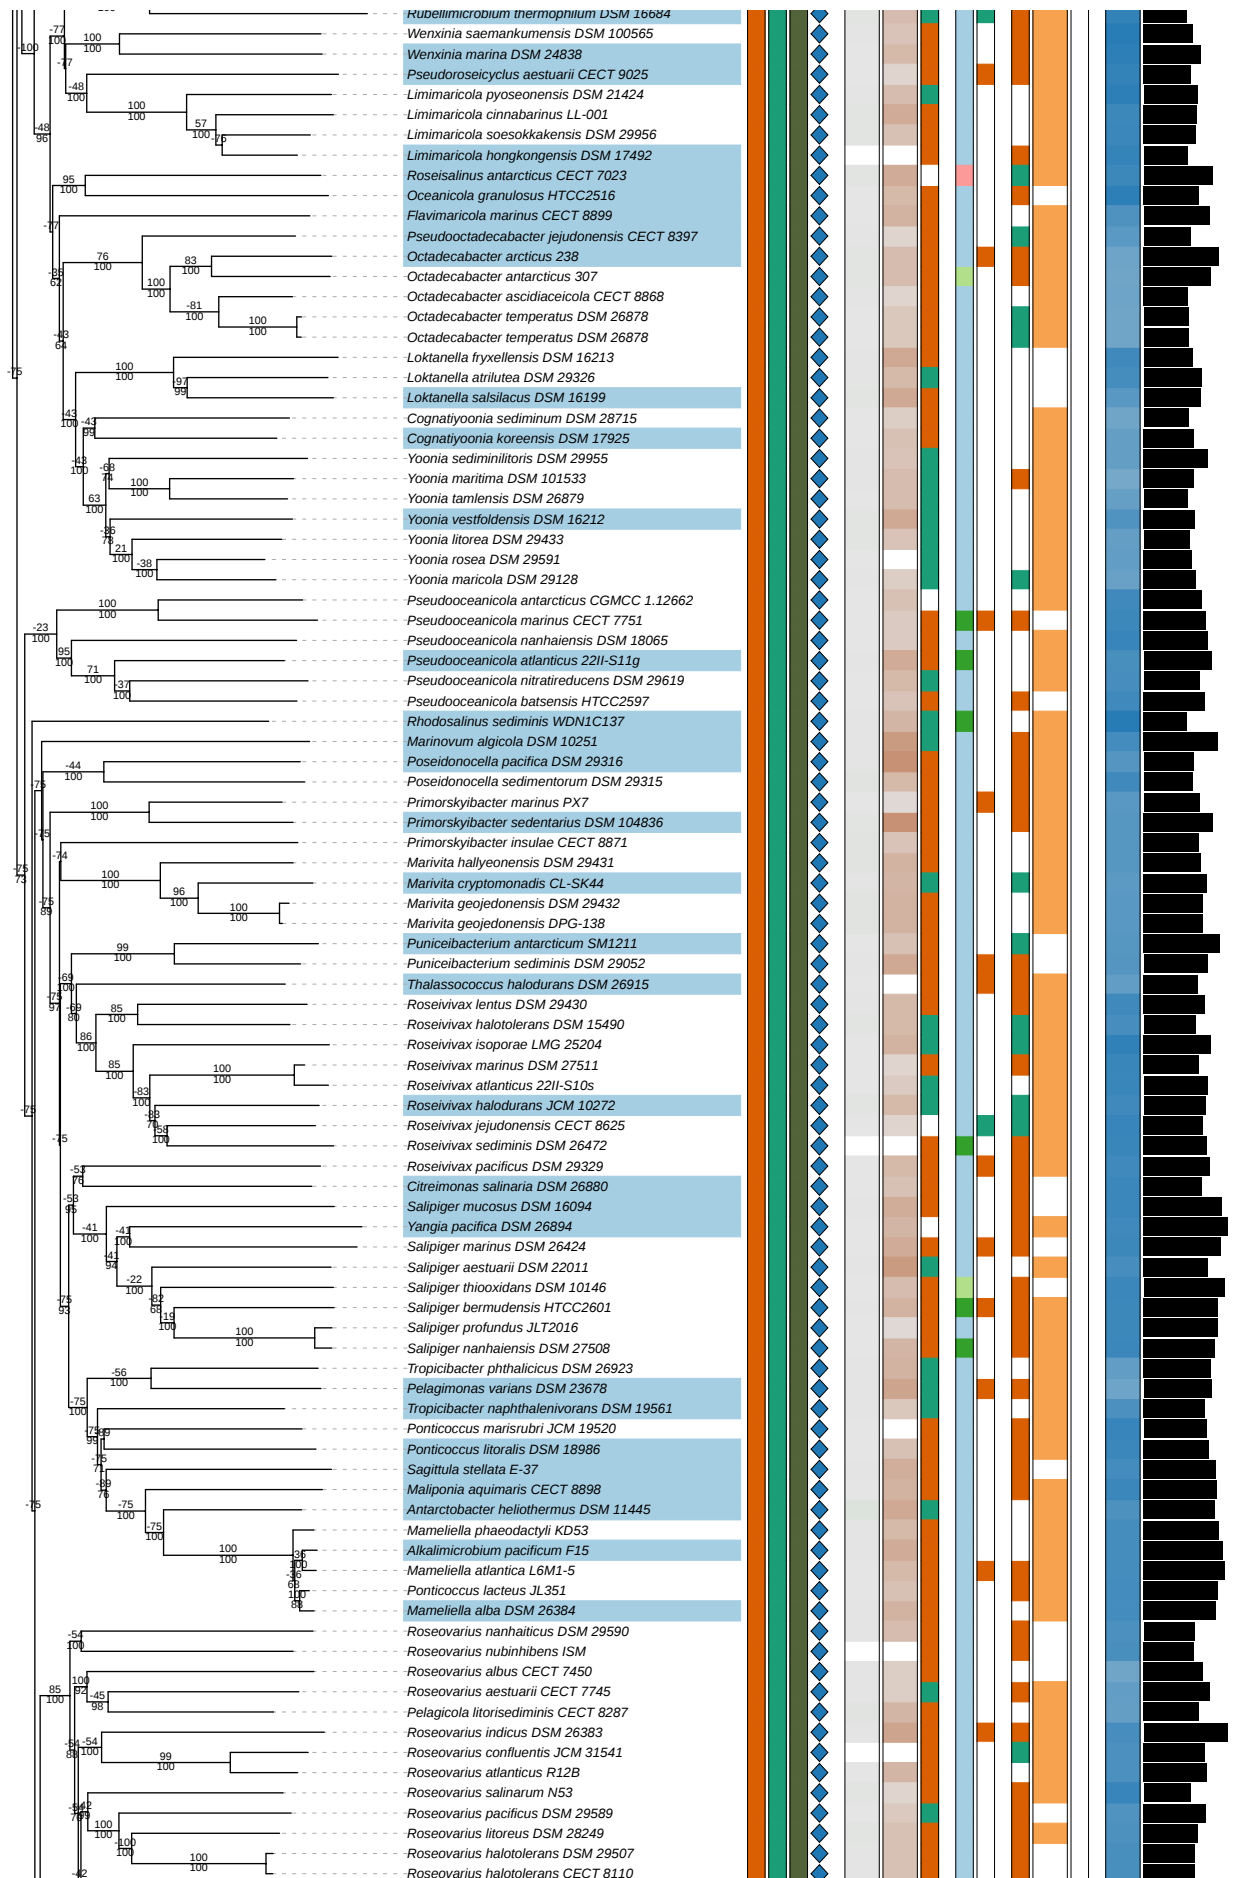

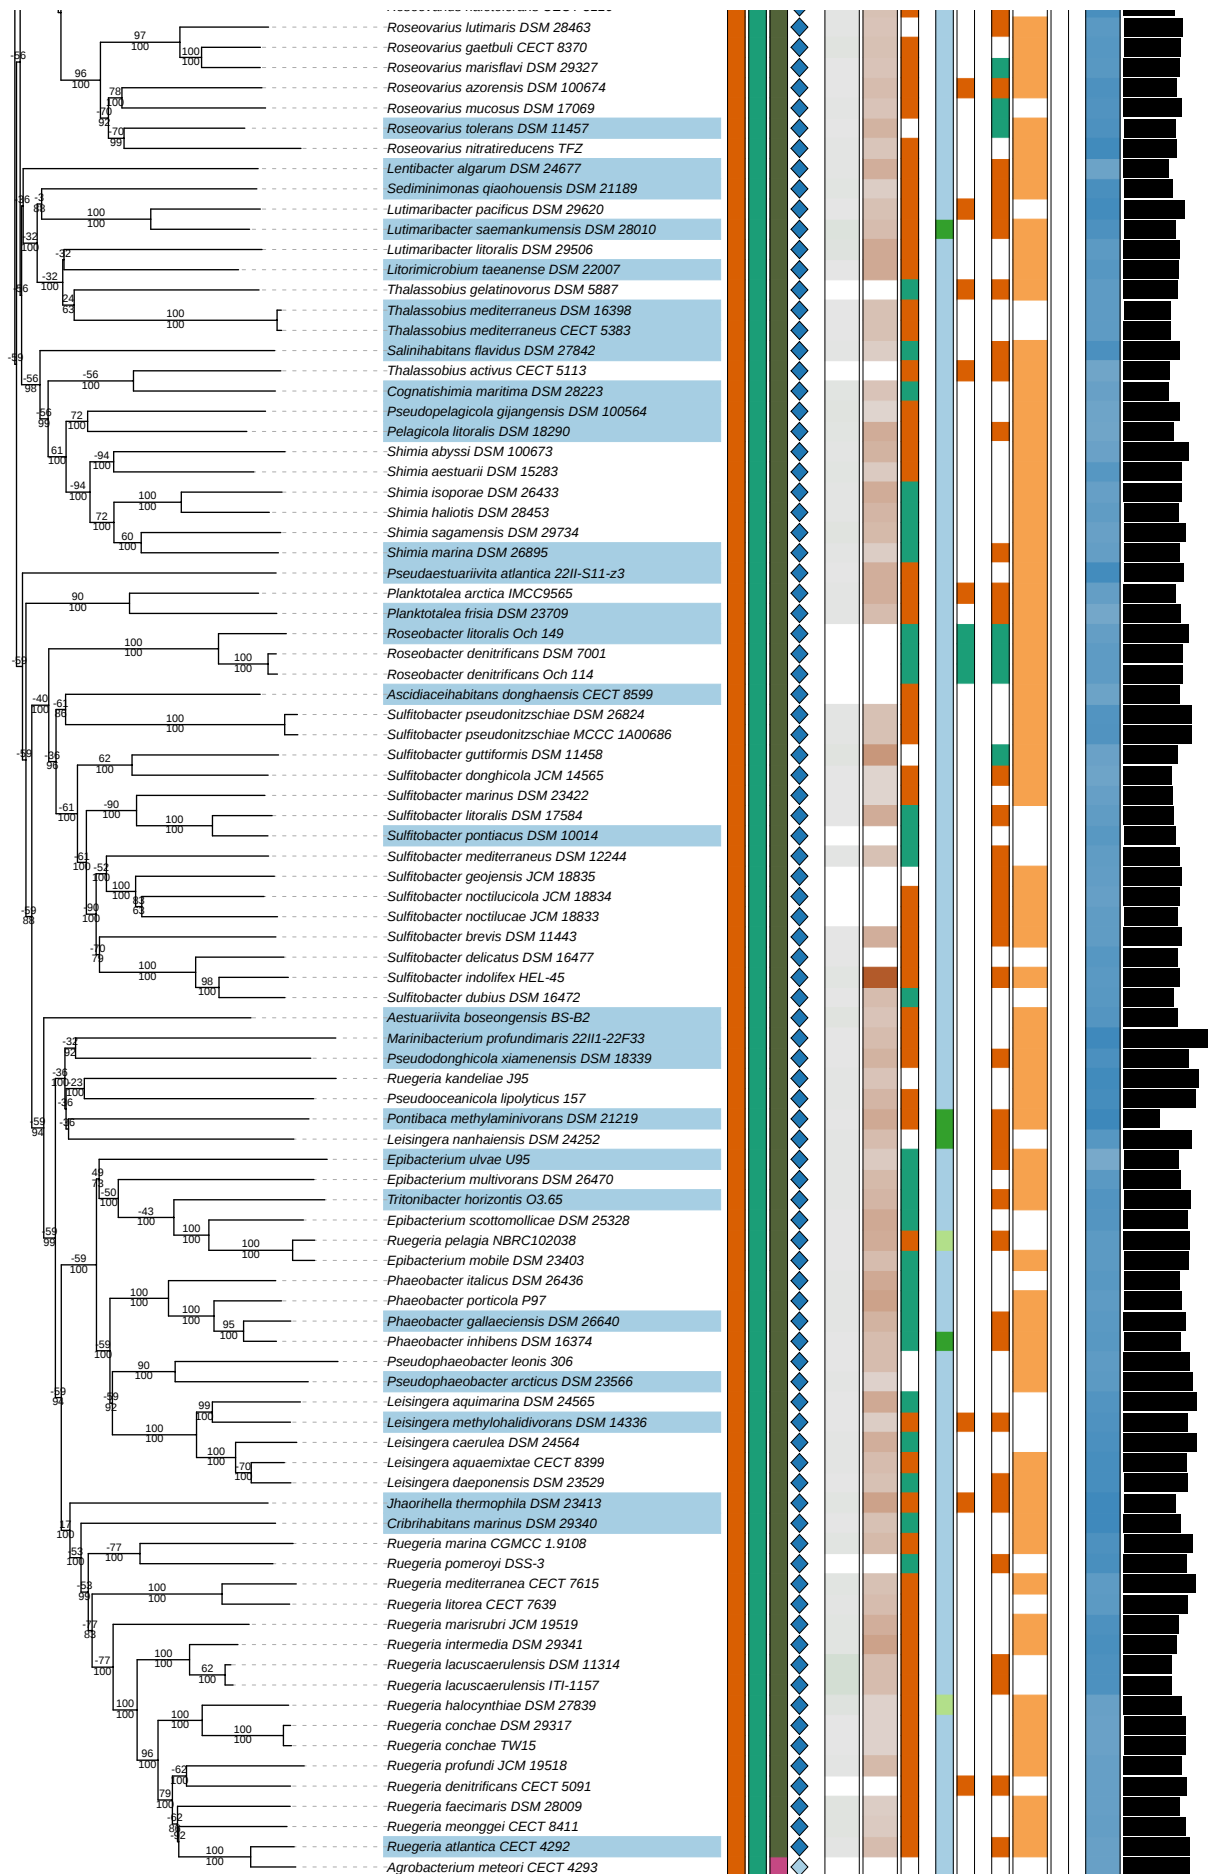

Figure 1: The figure shows the complete, uncollapsed GBDP tree of the *Alphaproteobacteria* genome dataset, which had to be distributed across Figures 1-9 in the main manuscript. Tree inferred with FastME from GBDP distances calculated from whole proteomes. The branches are scaled in terms of log-transformed intergenomic distances (GBDP formula  $d_5$ ). The numbers below branches are GBDP pseudo-bootstrap support values from 100 replications. The numbers above branches are support (positive) or conflict (negative) values from the gene-content analysis. Tip colors indicate type species, colors to the right of the tips indicate, from left to right, phylum (1), class (2), order (3) and family (4). The blocks labelled as "phenotype" display phenotypic information (5-13), whereas the blue gradient scale (14) indicates the exact G+C content as calculated from the genome sequences. Genome size (15) is displayed at the right-hand side. See the embedded legend for details. *Jannaschia aquimarina* DSM 28248 is represented by two distinct GenBank biosample accessions (above: SAMN05421775, below: SAMN03329626). The same holds true for *Octadecabacter temperatus* DSM 26878 (above: SAMN03891579, below: SAMN05444287), *Rhodobacter veldkampii* DSM 11550 (above: SAMN10866319, below: SAMN08535030) and *Sphingomonas sanxanigenens* DSM 19645 (above: SAMN02641489, below: SAMN02745820).

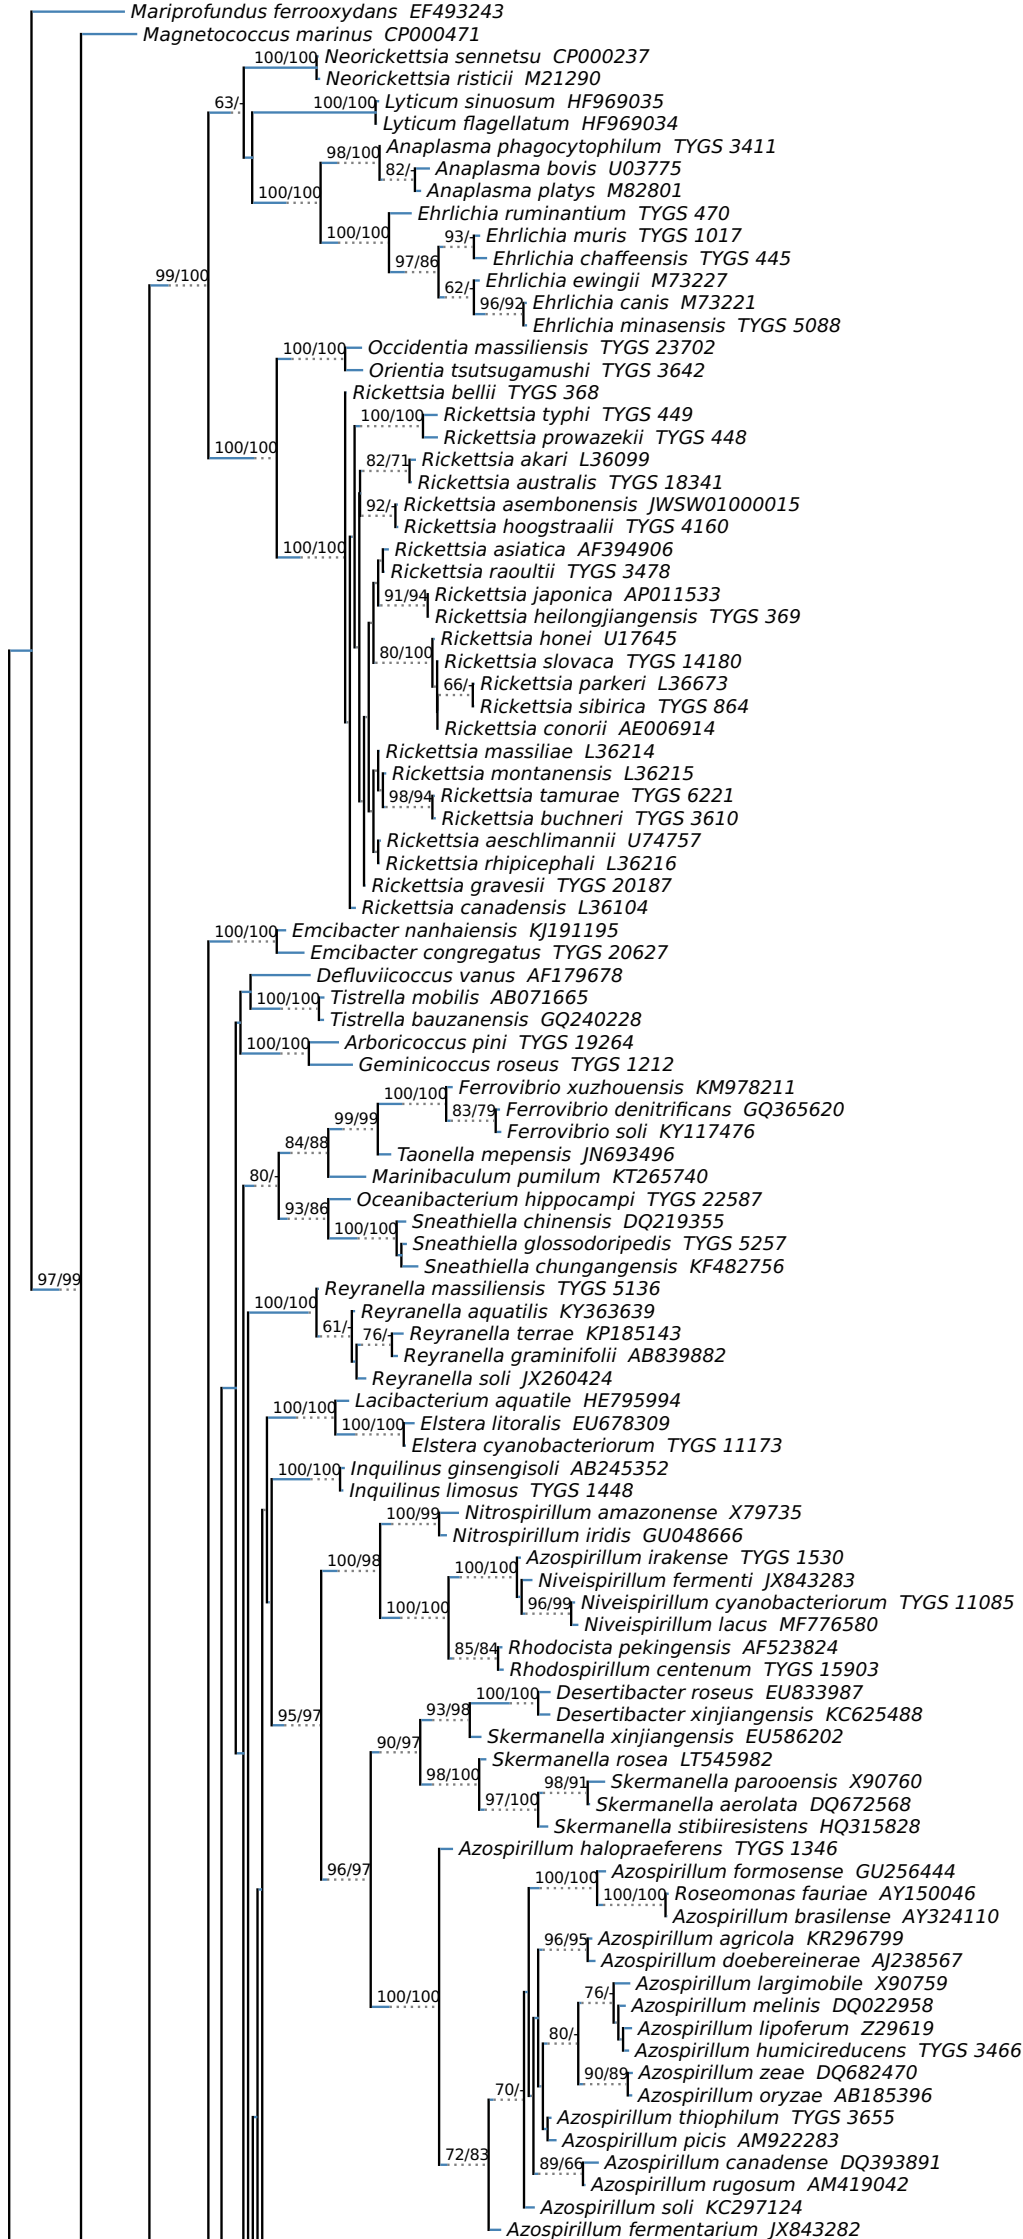

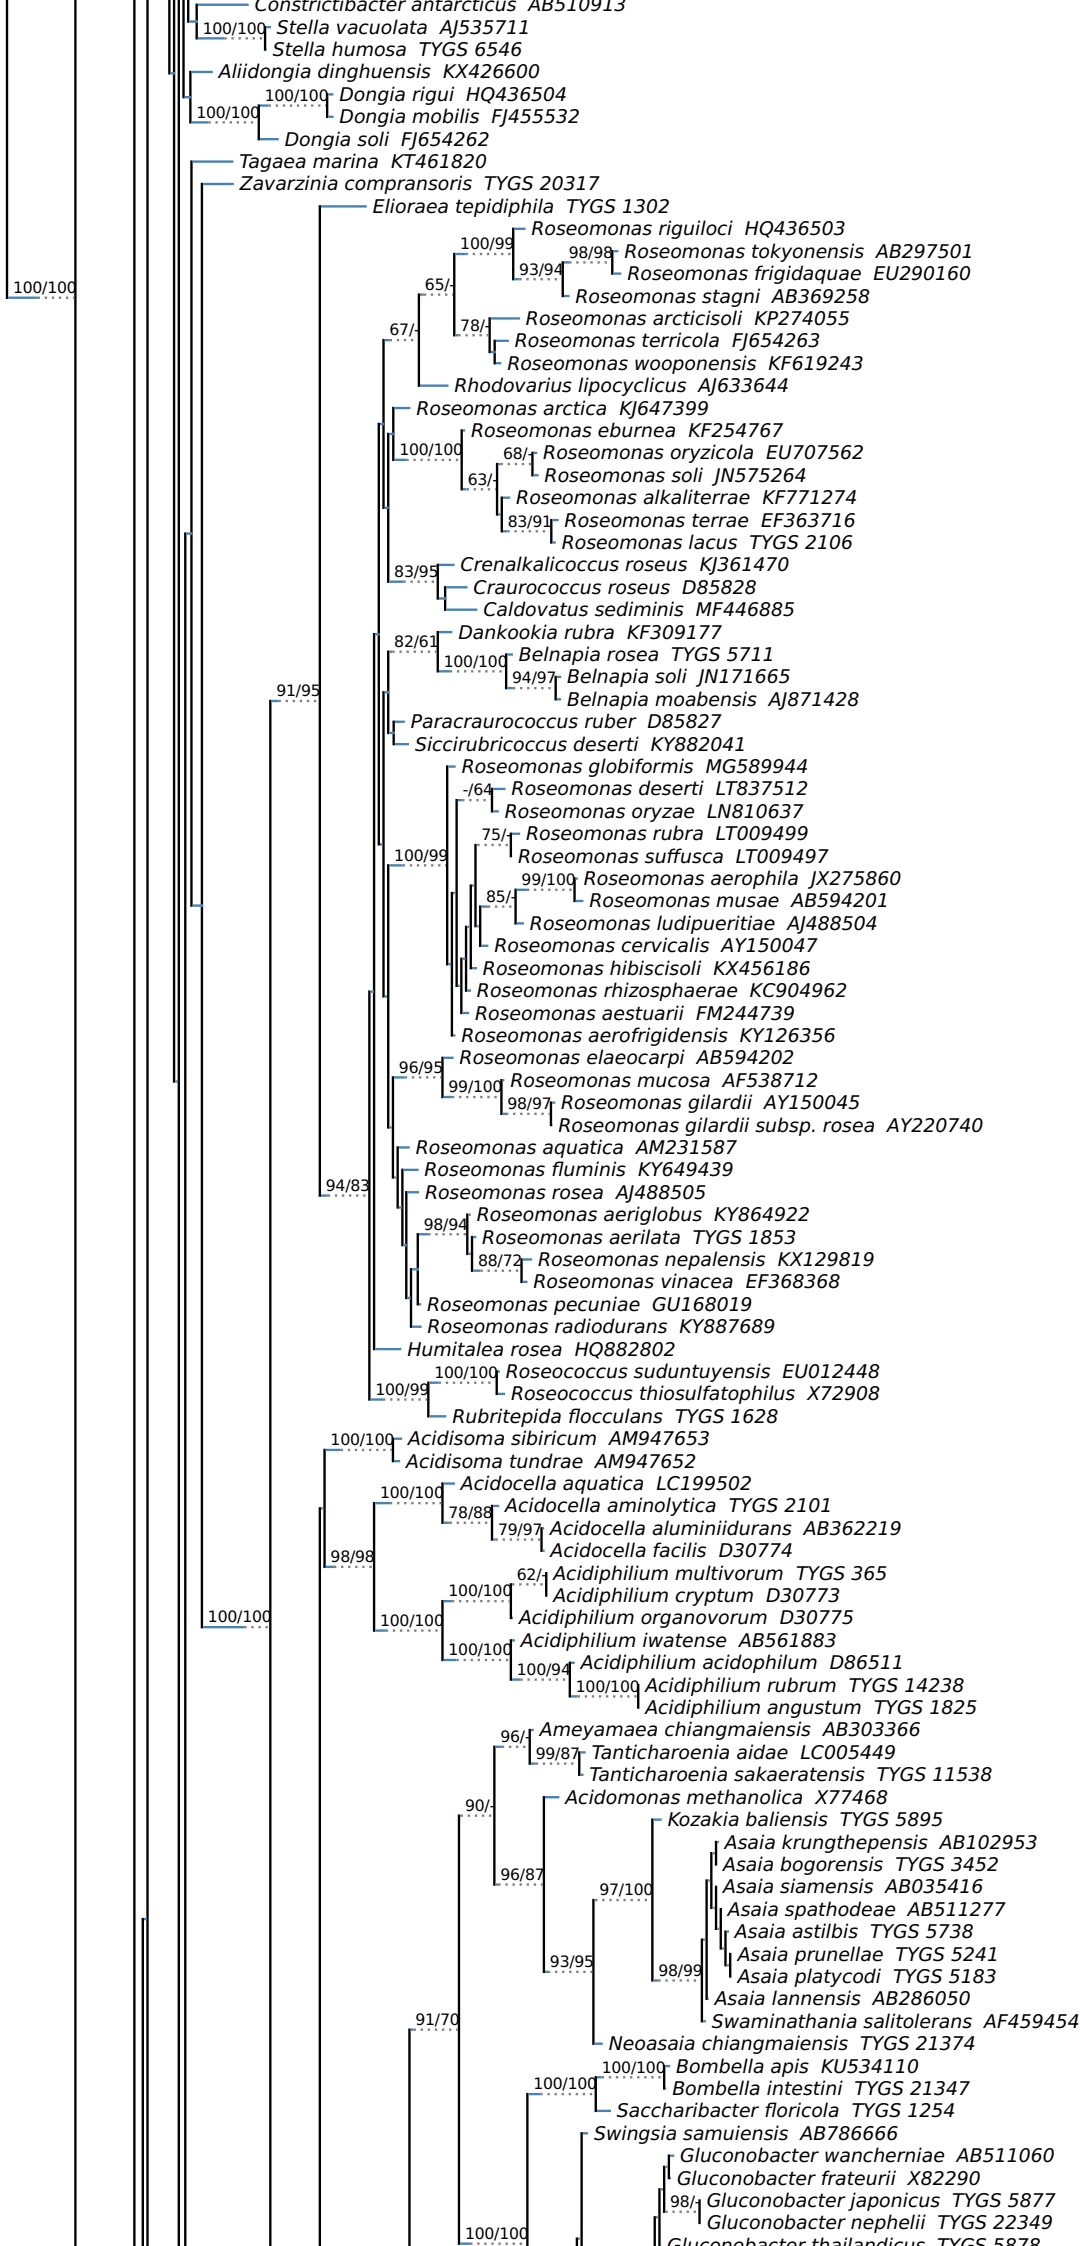

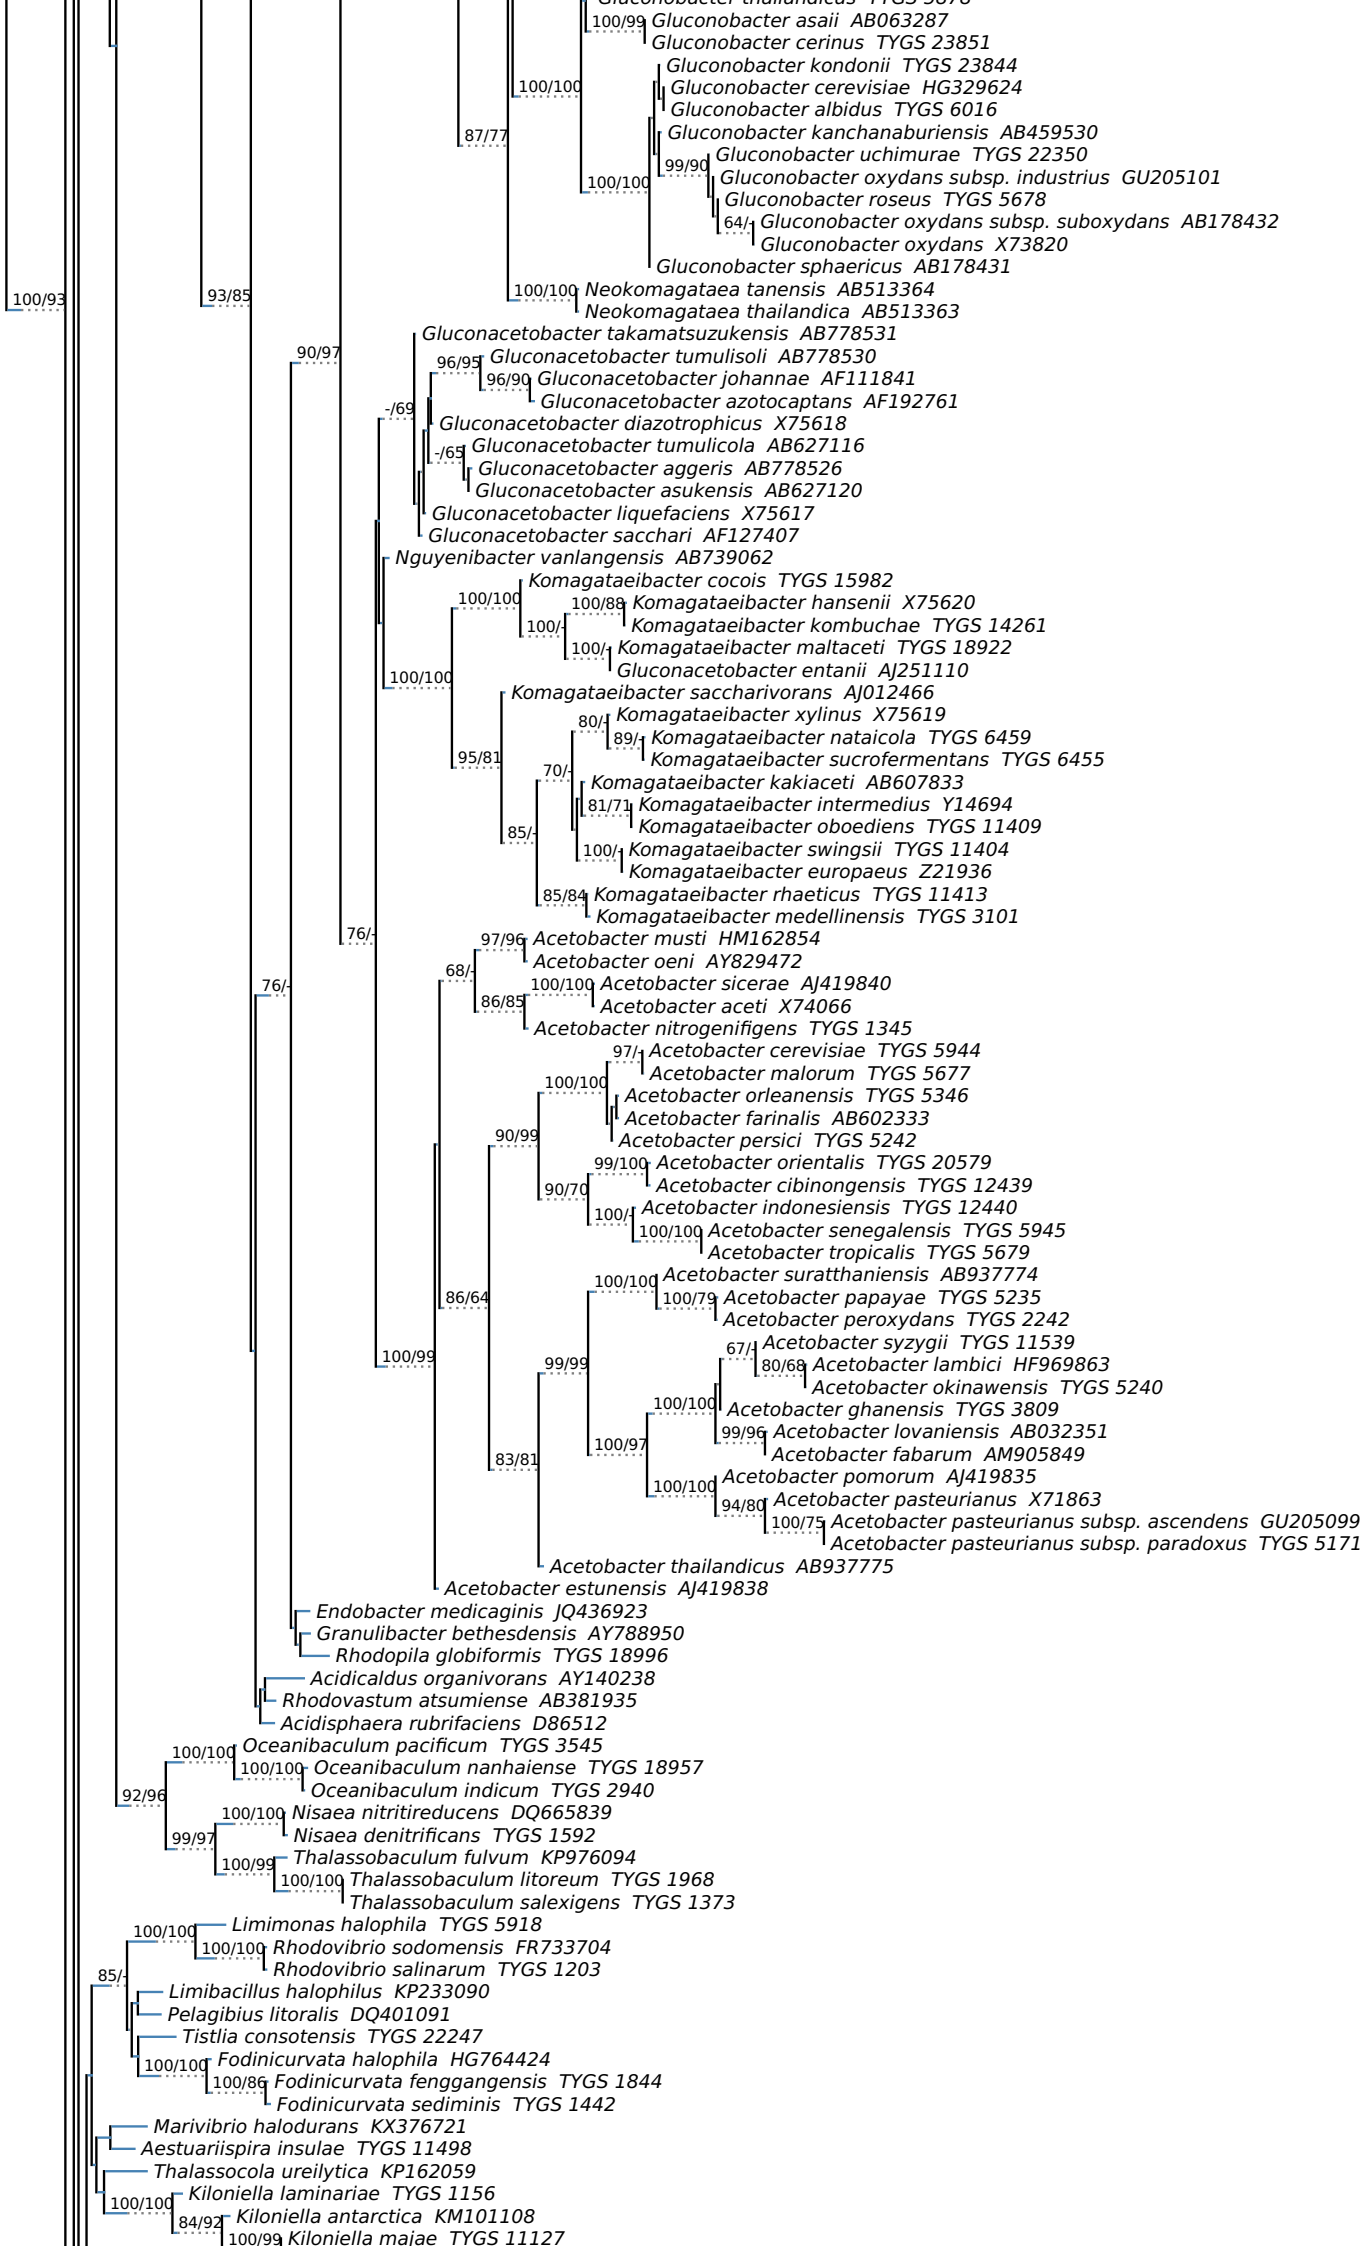

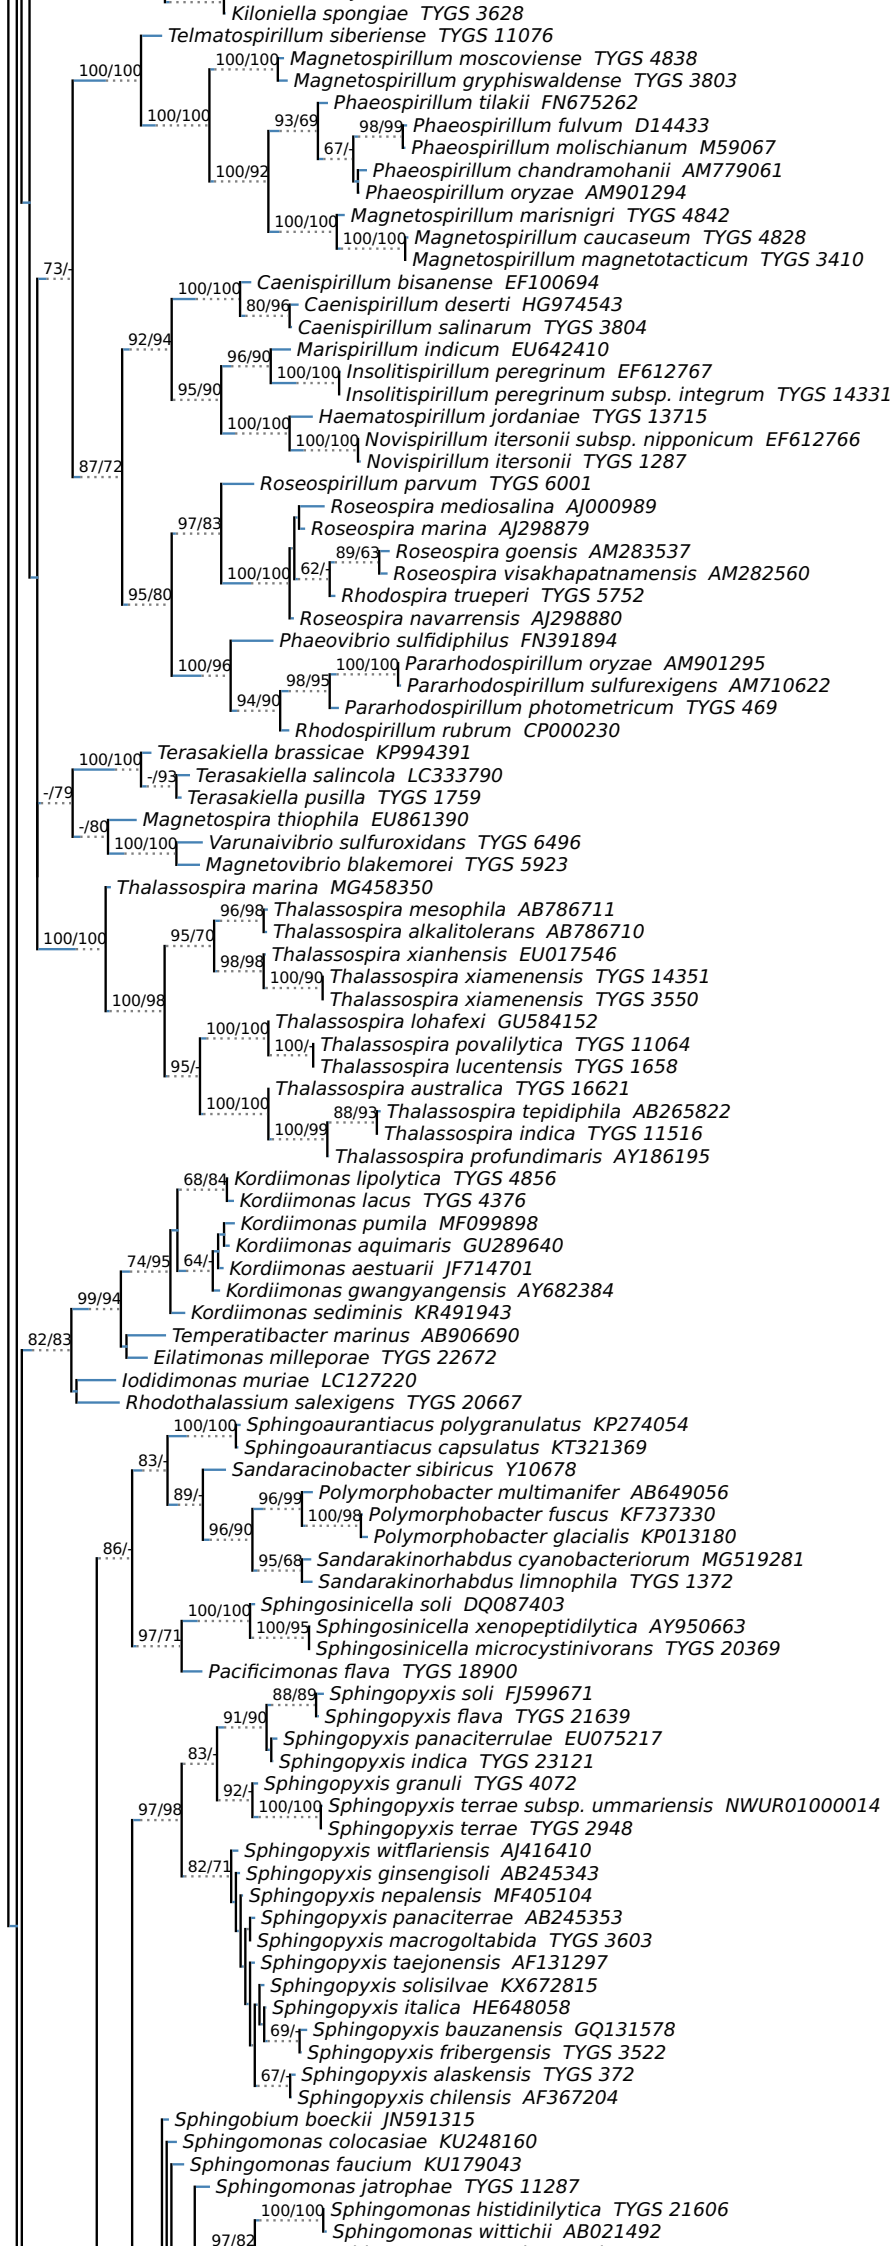

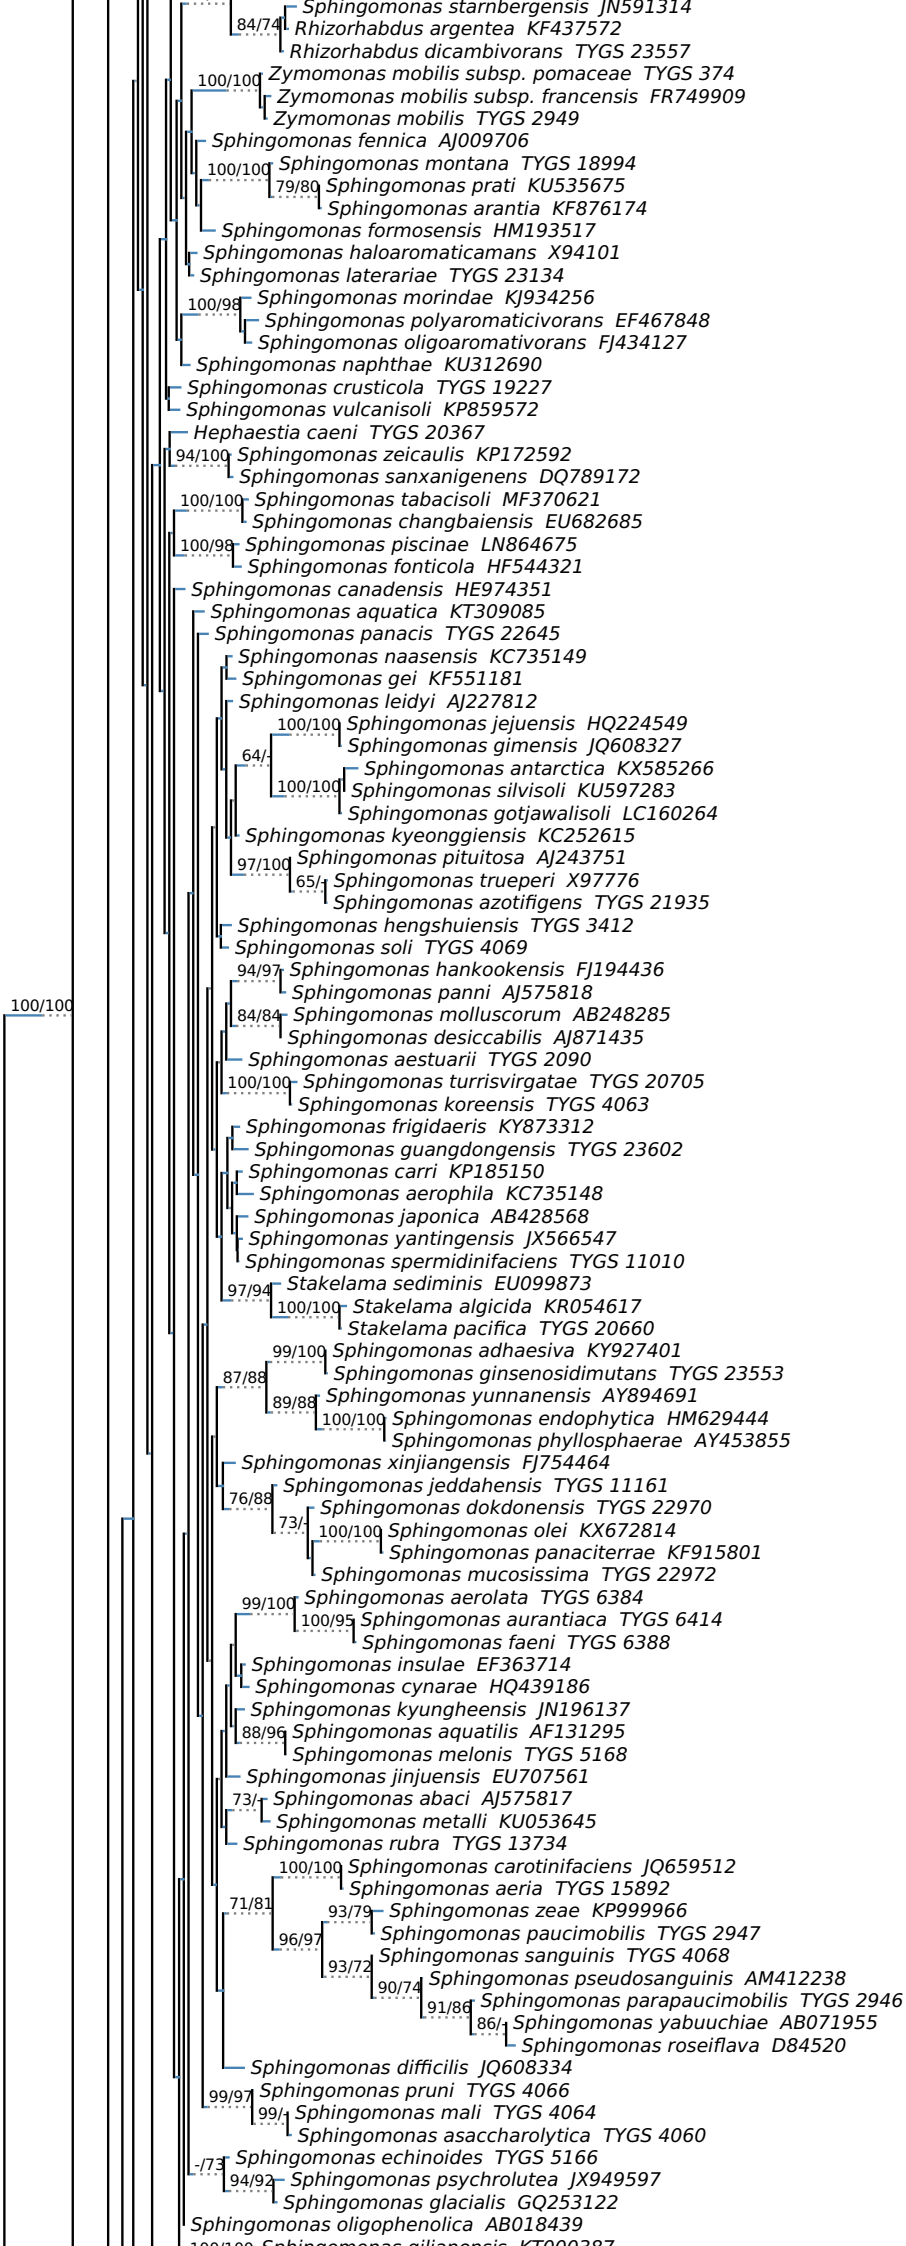

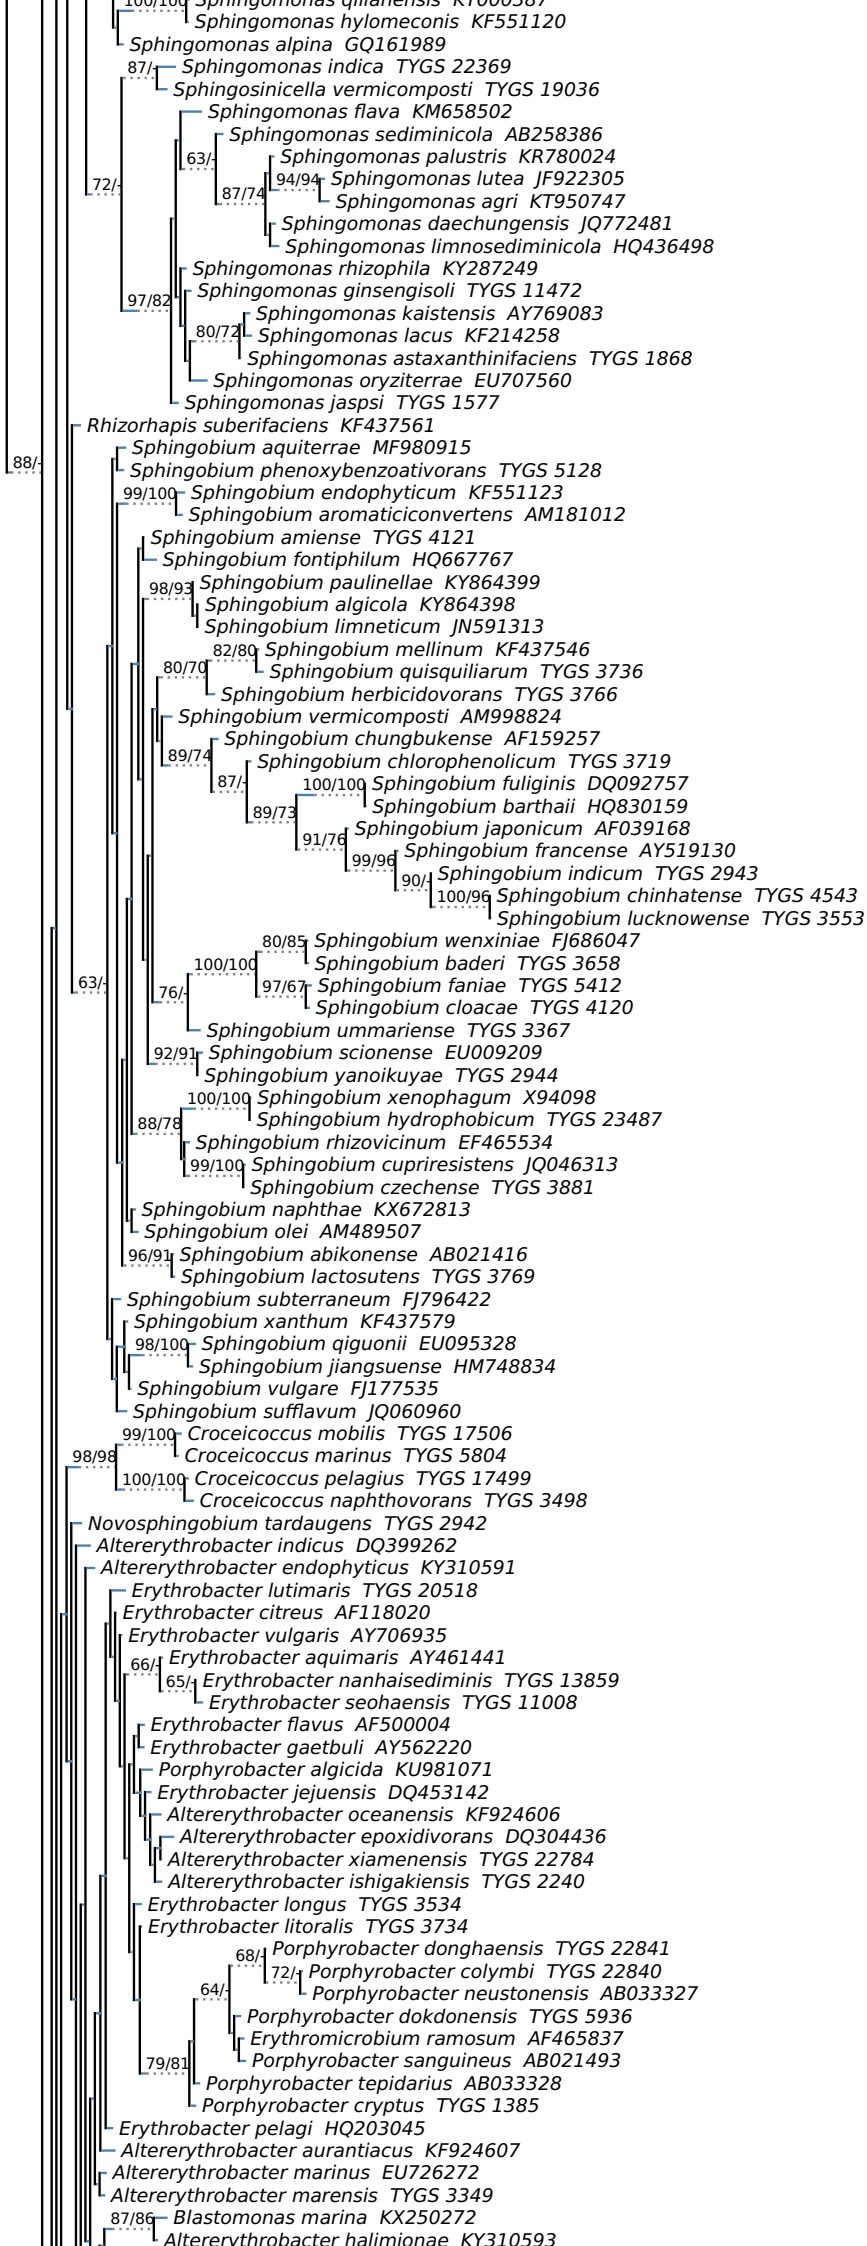

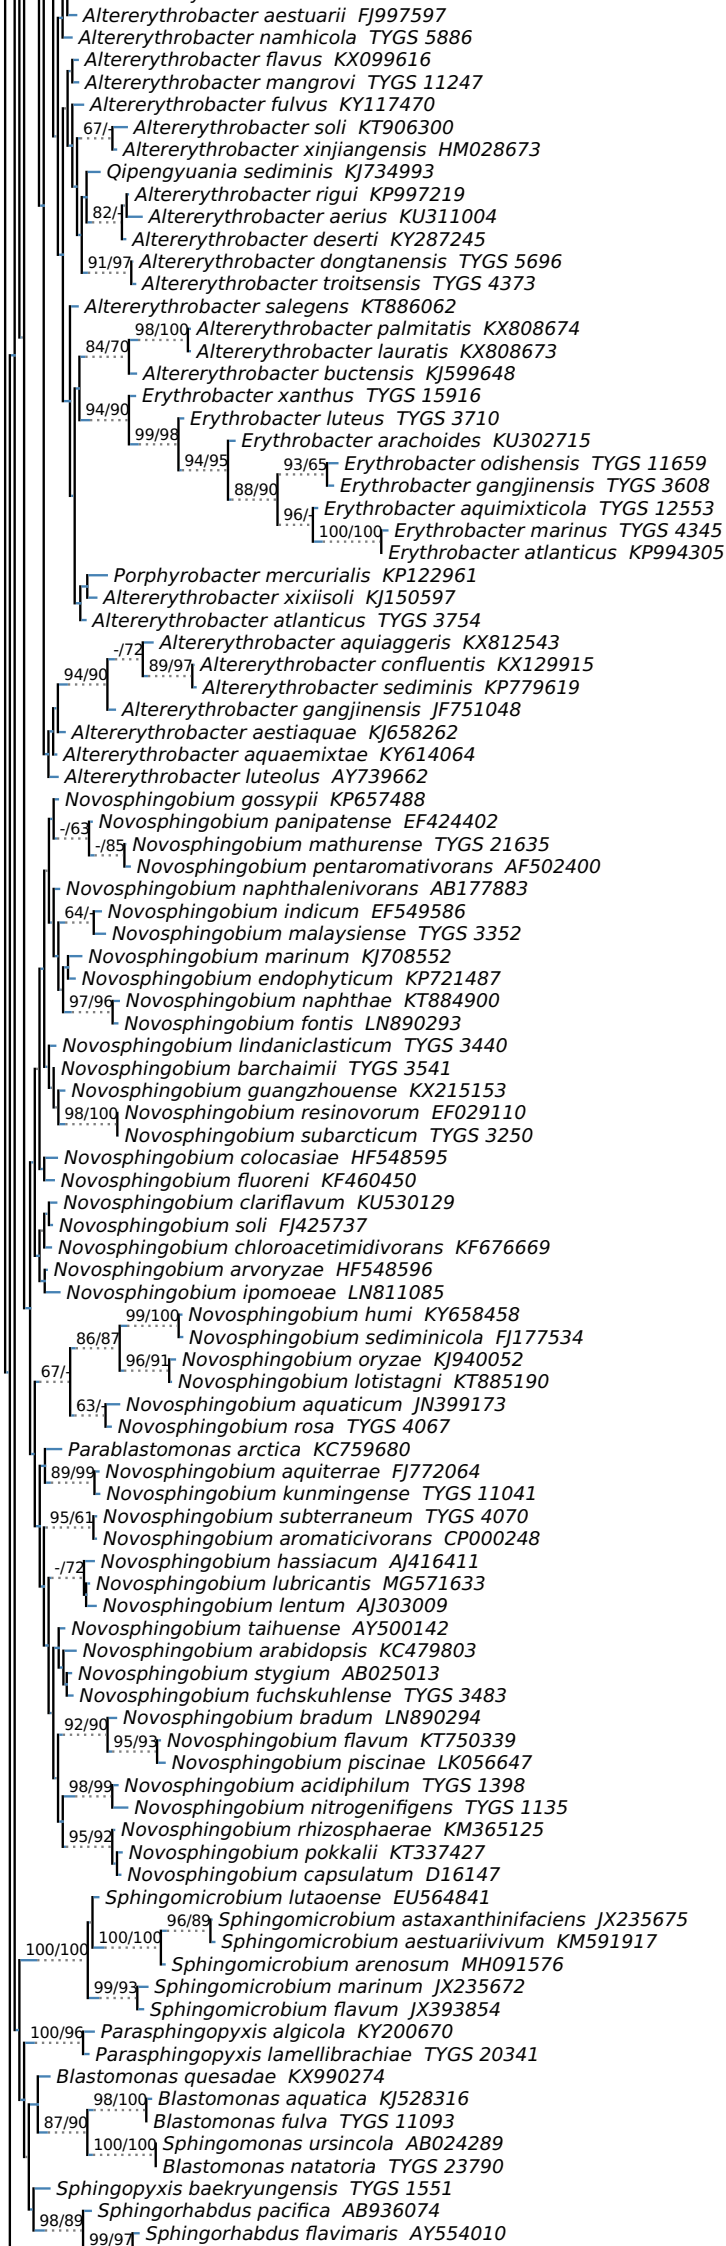

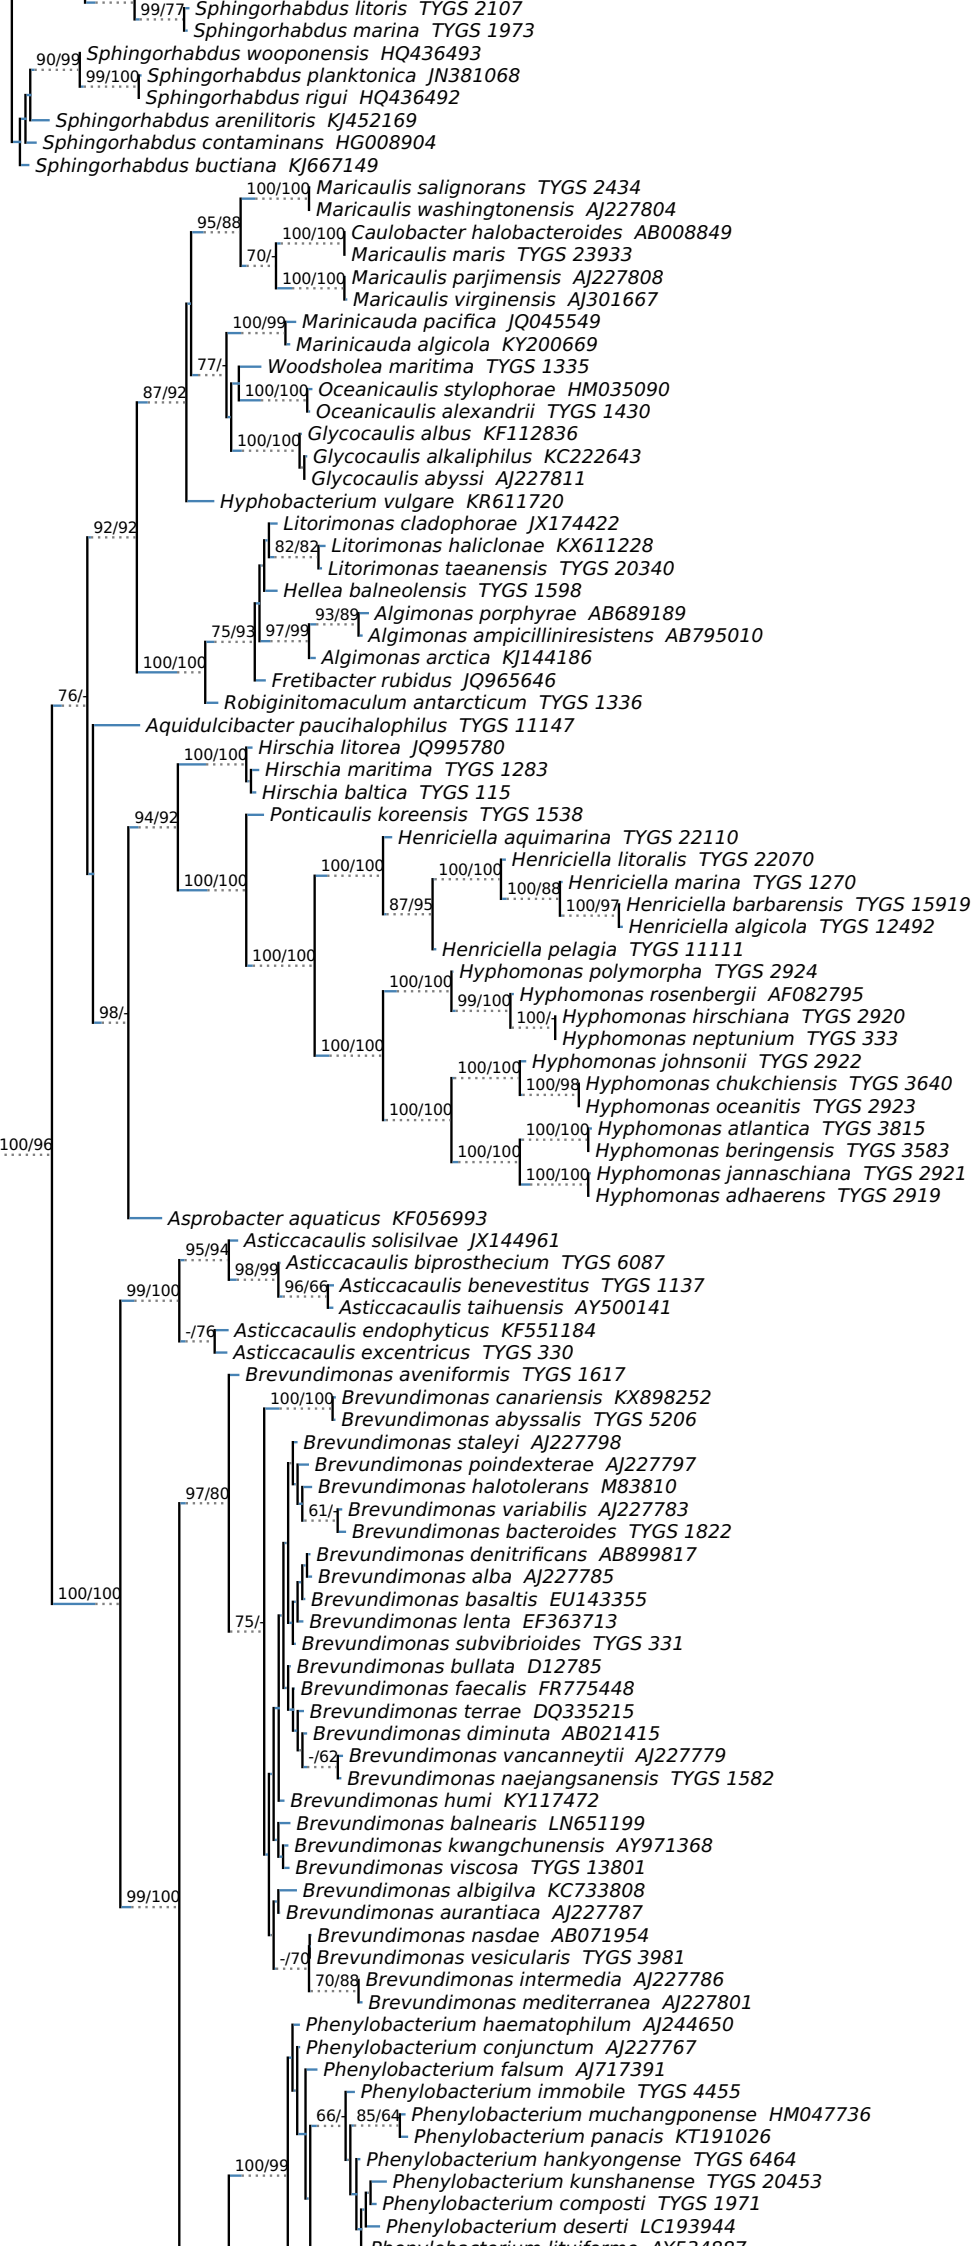

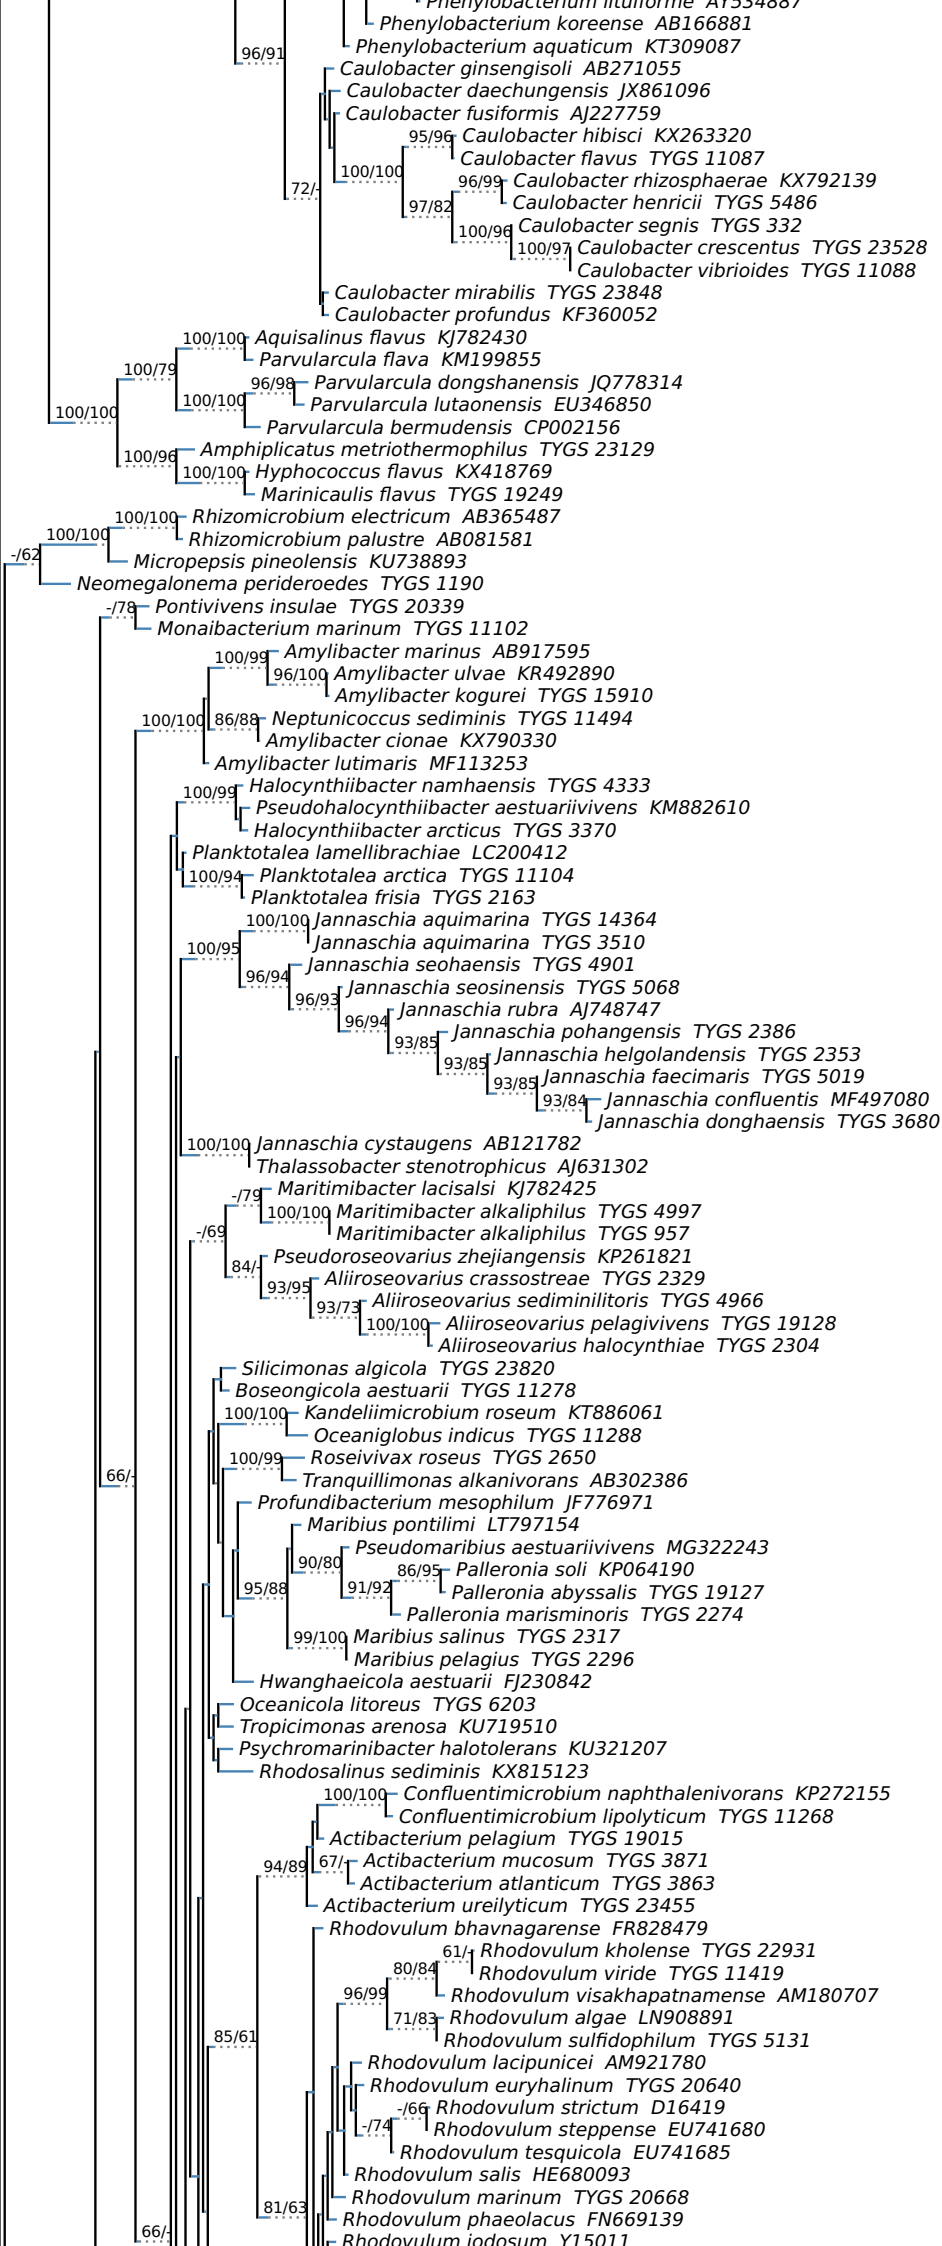

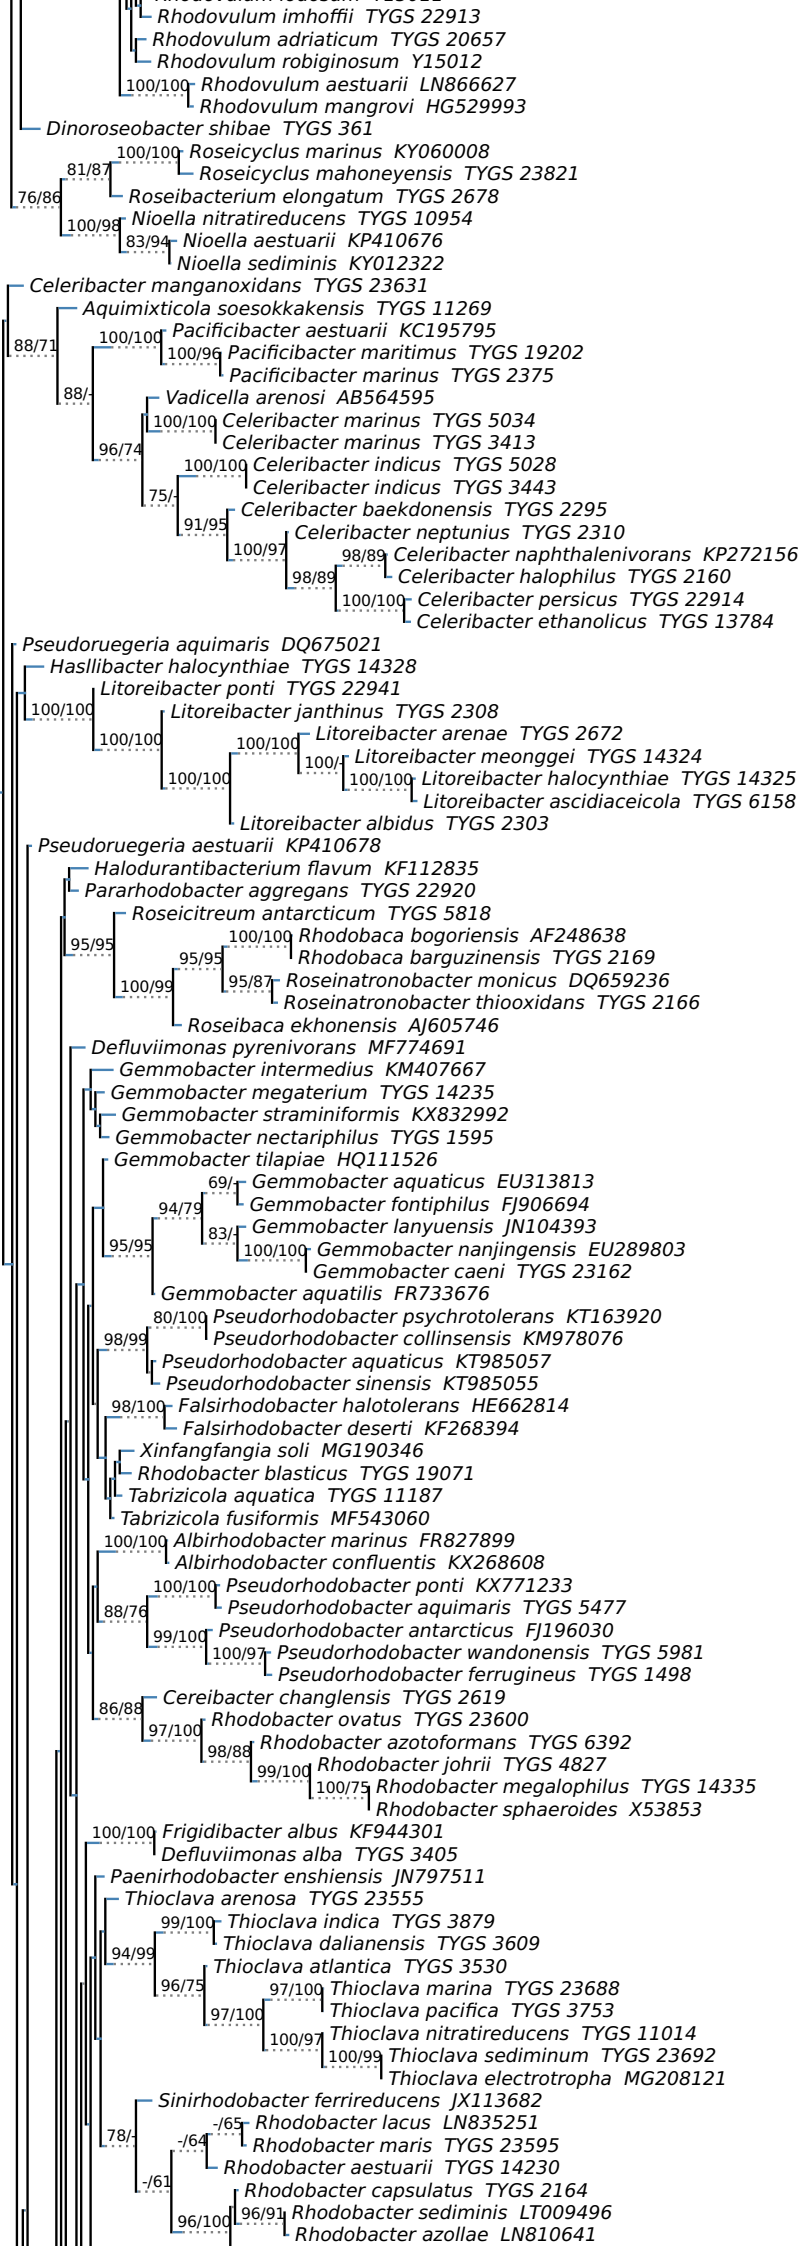

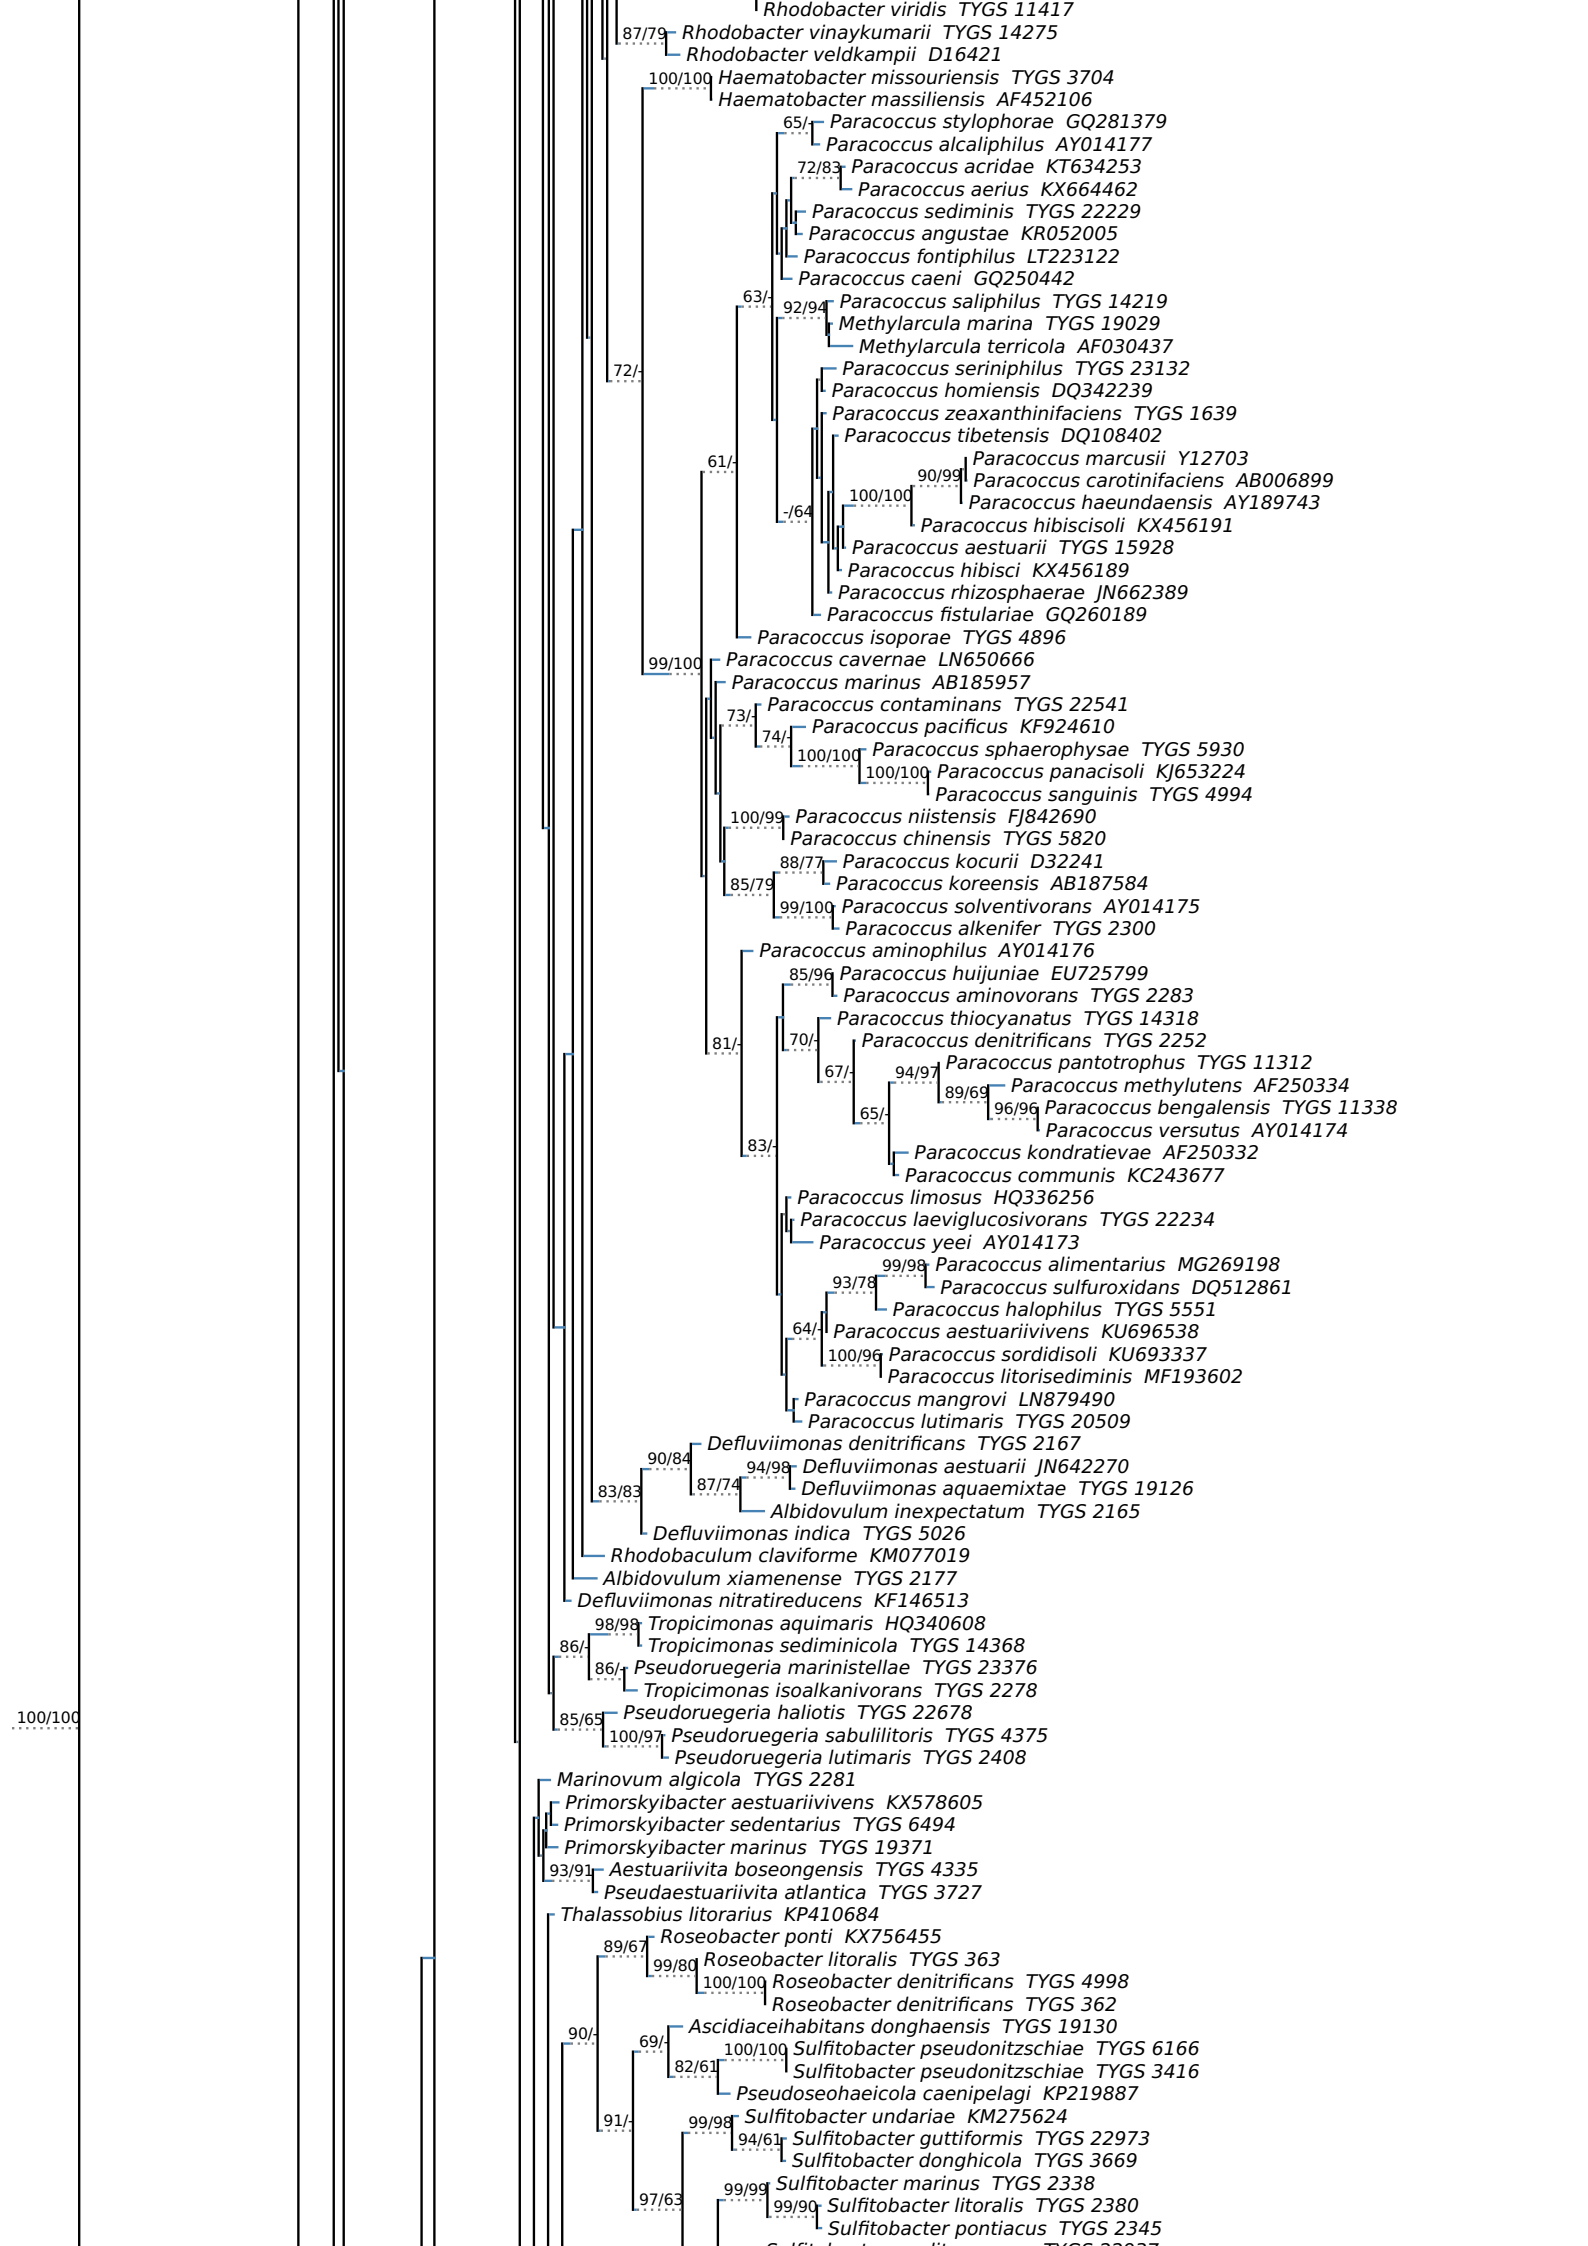



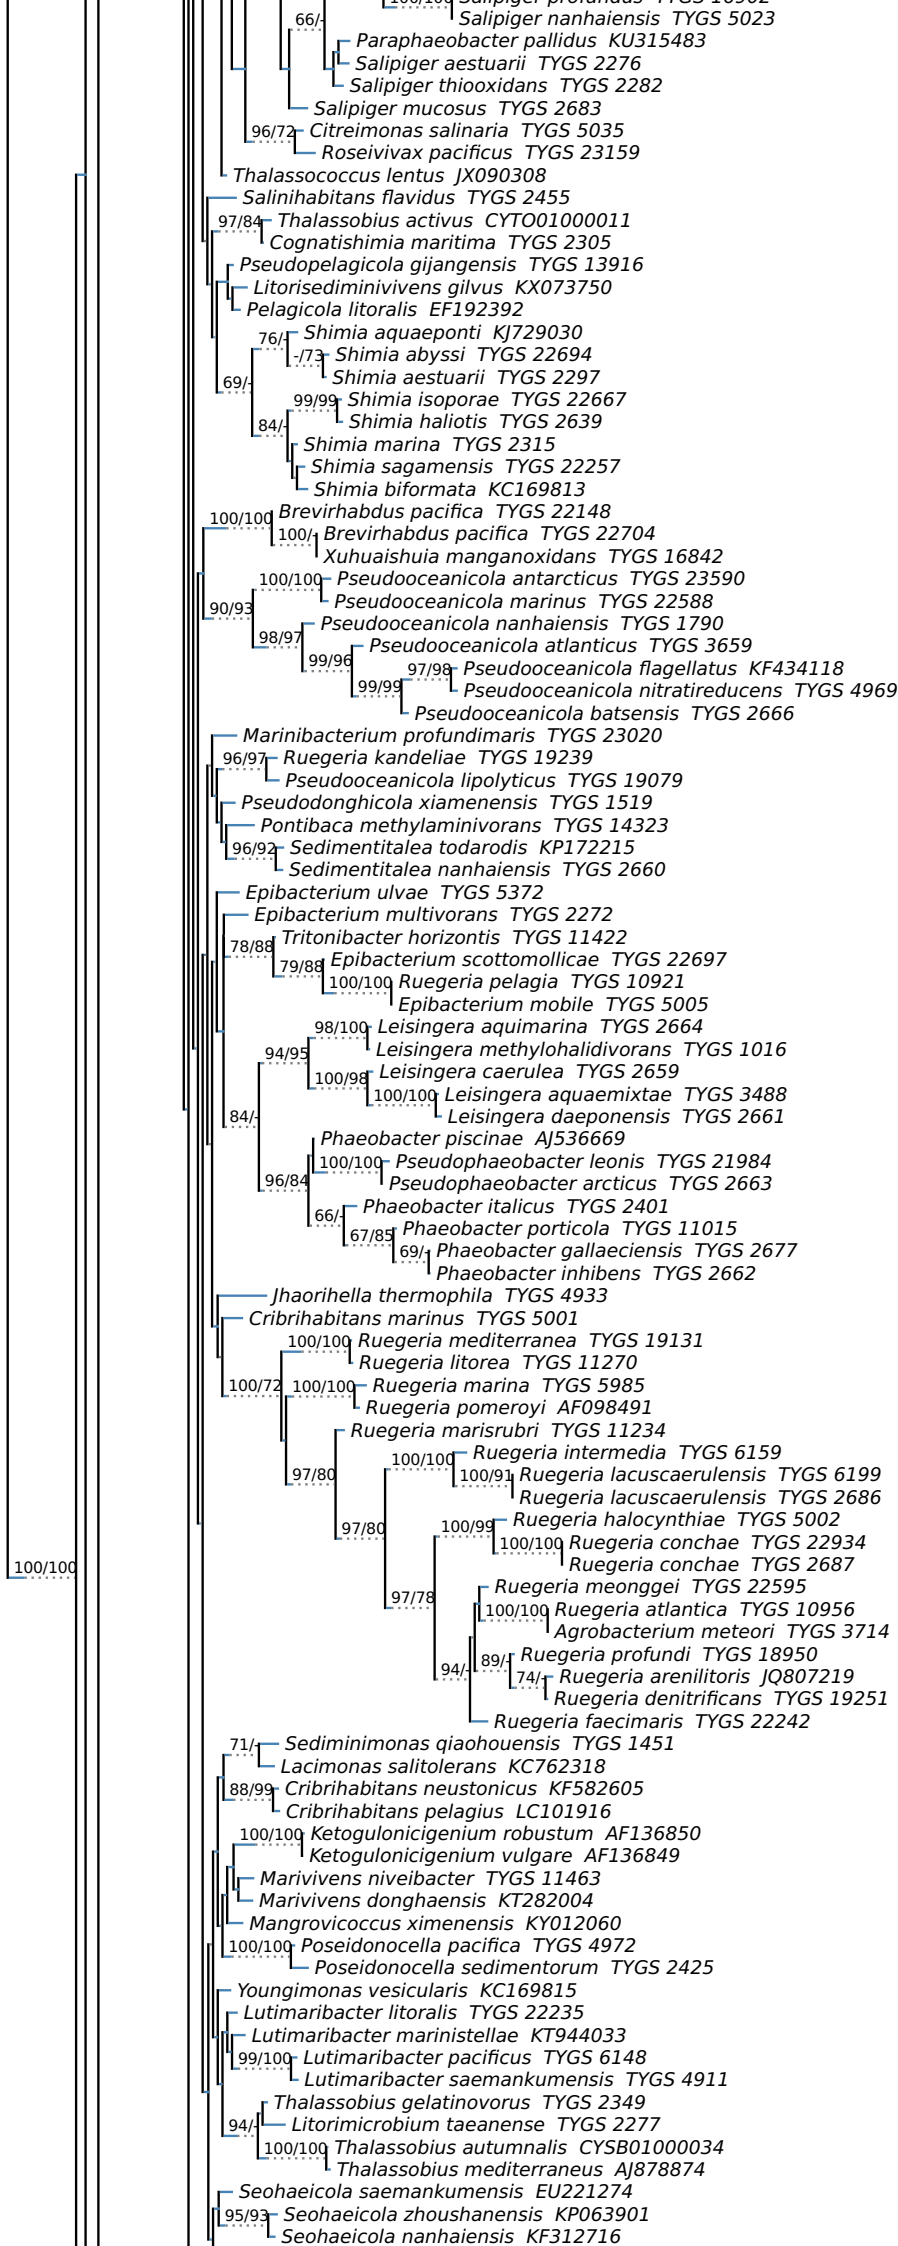

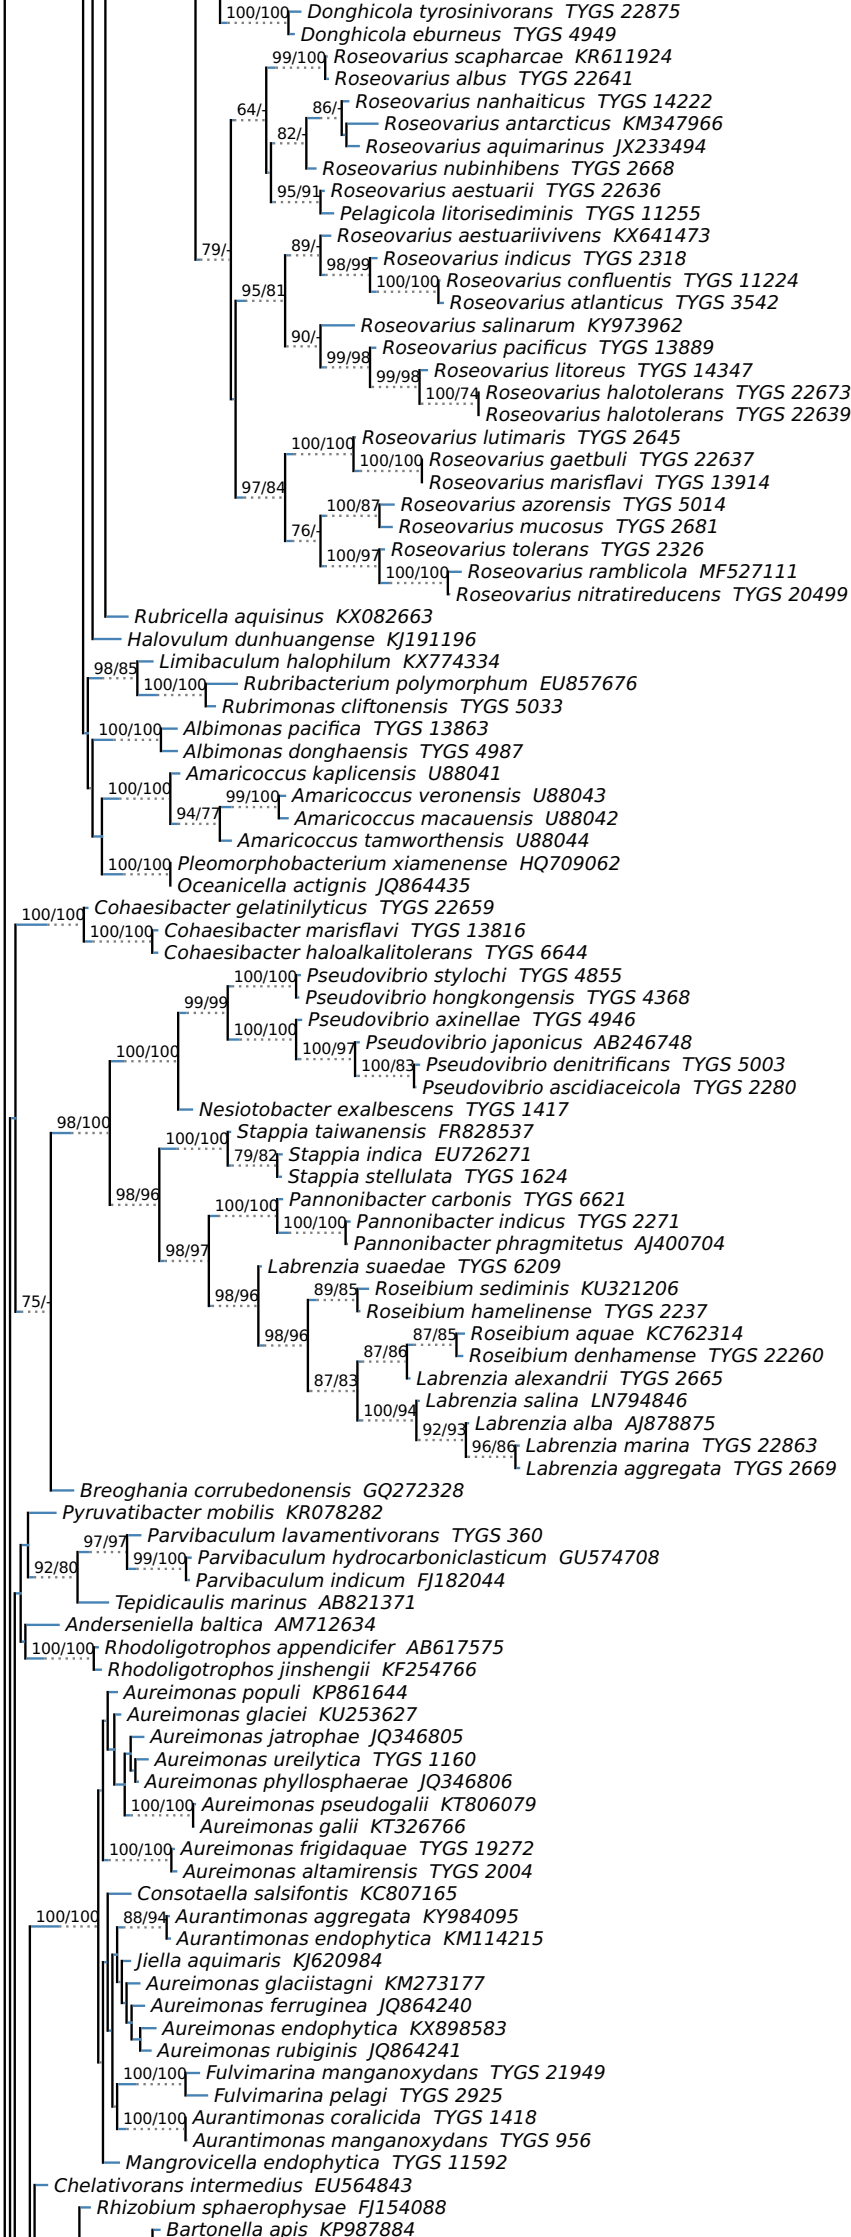

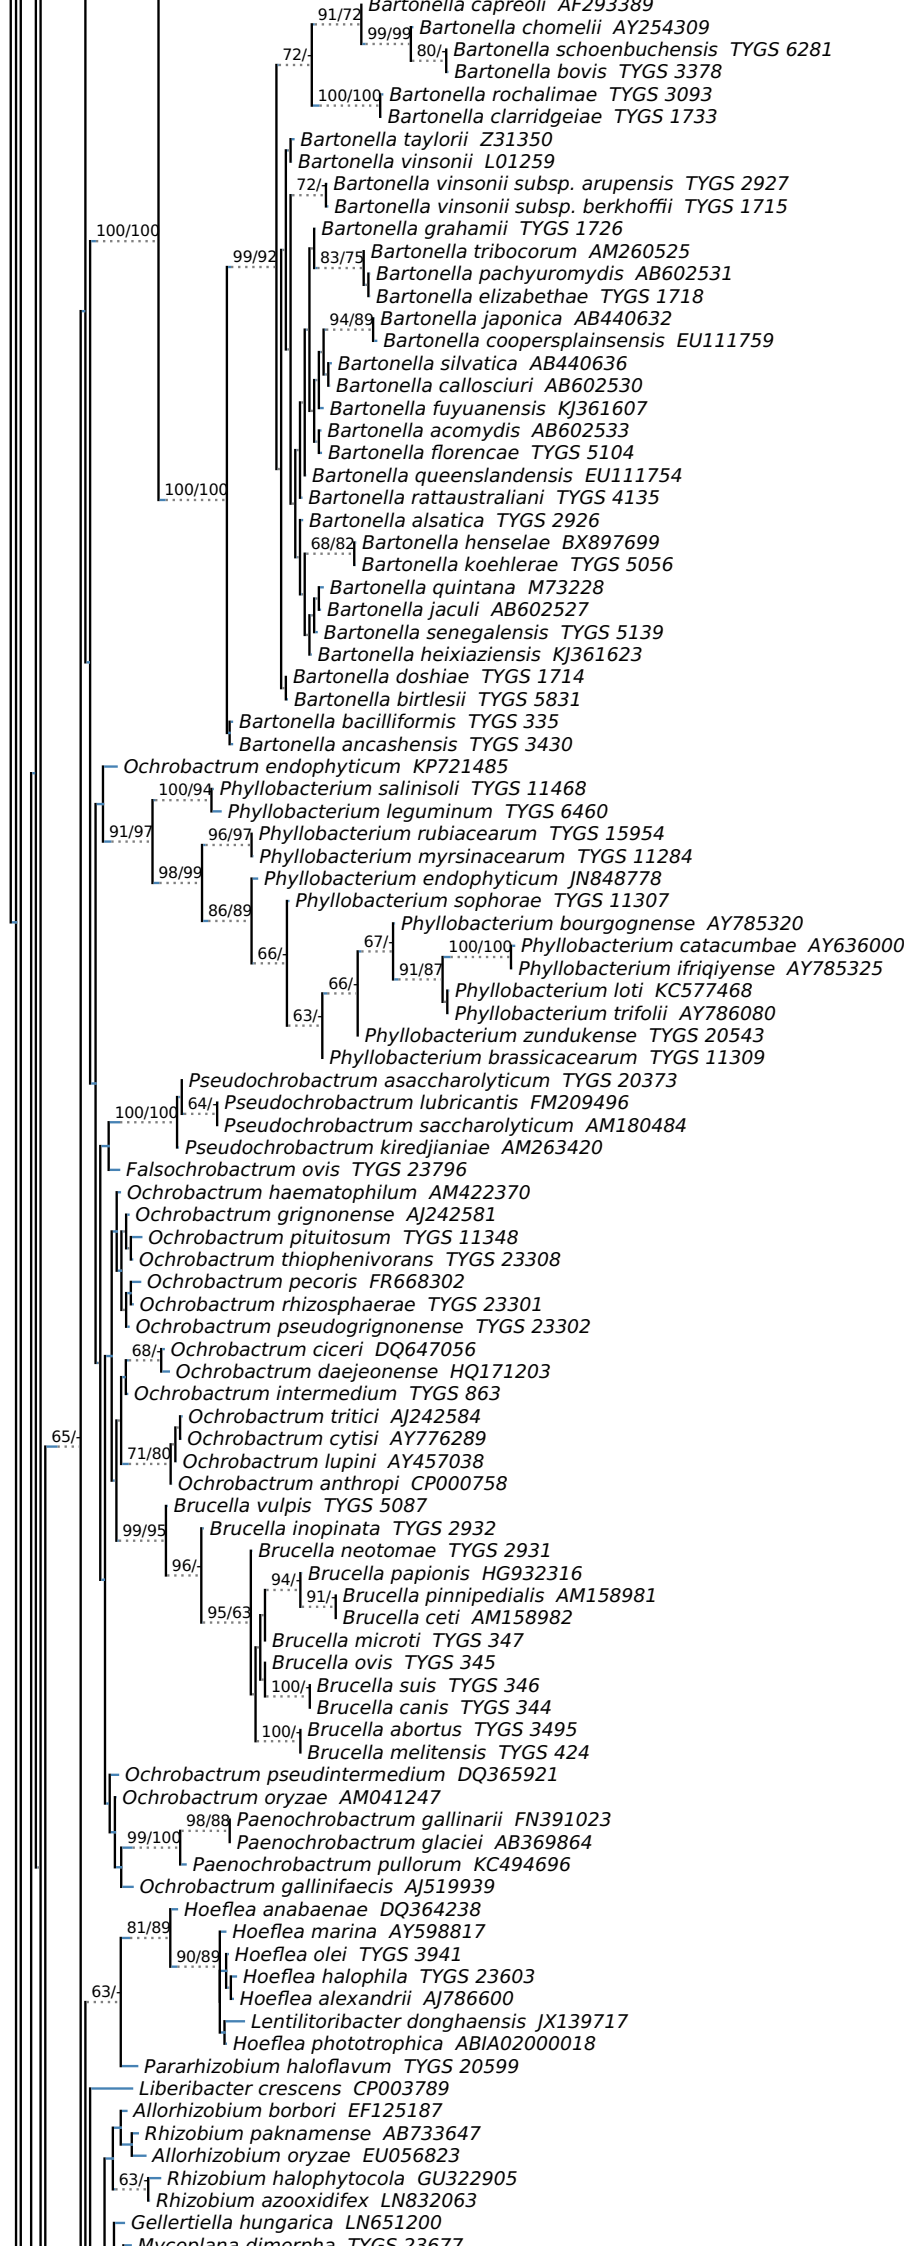

*Mycoplana umbrina* TYGS 23577  
*Mycoplana ramosa* D13944  
*Rhizobium subbaraonis* TYGS 23599  
*Rhizobium arenae* TYGS 11023  
95/84 *Pararhizobium herbae* GU565534  
90/74 *Pararhizobium polonicum* TYGS 23693  
87/87 *Pararhizobium giardinii* U86344  
*Rhizobium gei* KF551166  
*Pararhizobium antarcticum* LSRP01000156  
*Ensifer sesbaniae* JF834143  
*Ensifer glycinis* TYGS 9045  
*Ensifer shofinae* TYGS 23643  
*Ensifer sahelii* TYGS 5684  
*Ensifer alkanisoli* TYGS 11070  
*Ensifer sojae* TYGS 5735  
*Ensifer americanus* TYGS 5683  
*Ensifer fredii* X67231  
*Ensifer kummerowiae* AY034028  
*Ensifer xinjiangensis* AM181732  
*Ensifer arboris* TYGS 5165  
163 *Ensifer psoraleae* EU618039  
*Ensifer medicae* L39882  
89/86 *Ensifer numidicus* AY500254  
94/80 *Ensifer meliloti* D14509  
*Ensifer kostiensis* Z78203  
*Ensifer garamanticus* AY500255  
*Ensifer terangae* X68388  
*Ensifer mexicanus* DQ411930  
*Ensifer morelensis* AY024335  
*Ensifer adhaerens* TYGS 3743  
*Rhizobium daejeonense* AY341343  
*Rhizobium alvei* HE649224  
97/96 *Allorhizobium undicola* TYGS 1803  
100/100 *Rhizobium oryzae* KX129901  
100/100 *Rhizobium taibaishanense* HM776997  
*Allorhizobium vitis* U45329  
*Rhizobium populi* KC609734  
*Rhizobium rosettiformans* EU781656  
83/76 *Rhizobium ipomoeae* HE866935  
*Rhizobium wuzhouense* TYGS 20638  
*Pararhizobium capsulatum* X73042  
*Rhizobium aggregatum* X73041  
92/79 *Ciceribacter lividus* TYGS 20326  
*Ciceribacter azotifigens* KX510117  
*Ciceribacter thiooxidans* KU975391  
98/97 *Rhizobium naphthalenivorans* AB663504  
*Rhizobium selenitireducens* EF440185  
*Agrobacterium nepotum* TYGS 5663  
100/100 *Agrobacterium radiobacter* TYGS 6109  
100/84 *Agrobacterium tumefaciens* TYGS 6094  
99/99 *Beijerinckia fluminensis* EU401907  
100/100 *Agrobacterium salinitolerans* TYGS 23342  
*Agrobacterium pusense* TYGS 5993  
93/82 *Rhizobium larrymoorei* TYGS 1696  
85/85 *Agrobacterium skirnewicense* HQ823551  
*Rhizobium rubi* D14503  
*Rhizobium pakistanense* AB854065  
*Rhizobium lemnae* AB738386  
*Rhizobium rhizoryzae* EF649779  
*Rhizobium helianthi* JQ032629  
94/94 *Allorhizobium pseudoryzae* DQ454123  
*Rhizobium straminoryzae* KF444510  
*Rhizobium capsici* HQ113369  
88/73 *Rhizobium endolithicum* HE818072  
*Rhizobium flavum* TYGS 20154  
*Rhizobium oryzicola* JX446583  
78/78 *Rhizobium puerariae* LC014930  
*Rhizobium petrolearium* EU556969  
100/100 *Pseudorhizobium pelagicum* JOKI01000038  
*Rhizobium marinum* TYGS 16877  
*Rhizobium tarimense* HM371420  
*Rhizobium smilacinae* KF551141  
67/78 *Rhizobium cellulosilyticum* DQ855276  
84/84 *Rhizobium zeae* KX932068  
*Rhizobium wenxiniae* KR610521  
*Rhizobium yantingense* KC934840  
*Rhizobium soli* EF363715  
*Neorhizobium alkanisoli* TYGS 18998  
*Neorhizobium huautlense* TYGS 11282  
99/99 *Rhizobium vignae* GU128881  
*Neorhizobium galegae* TYGS 3816  
*Rhizobium tubonense* TYGS 20459  
97/83 *Rhizobium rhizogenes* TYGS 2938  
76/76 *Rhizobium vallis* FJ839677  
99/98 *Rhizobium paranaense* EU488753  
90/90 *Rhizobium jaguaris* TYGS 11665  
*Rhizobium leucaenae* TYGS 5112  
*Rhizobium lusitanum* AY738130  
*Rhizobium mayense* JX855172  
*Rhizobium calliandrae* JX855162  
98/98 *Rhizobium miluonense* TYGS 3936  
97/98 *Rhizobium freirei* TYGS 3108  
98/98 *Rhizobium tropici* U89832  
99/99 *Rhizobium hainanense* TYGS 14249  
94/91 *Rhizobium multihospitium* TYGS 3923  
*Rhizobium mesoamericanum* JF424606  
*Rhizobium cauense* JQ308326  
*Rhizobium altiplani* TYGS 23849  
*Rhizobium endophyticum* EU867317  
90/90 *Rhizobium metallidurans* JX678769  
*Rhizobium agrammii* TYGS 3095

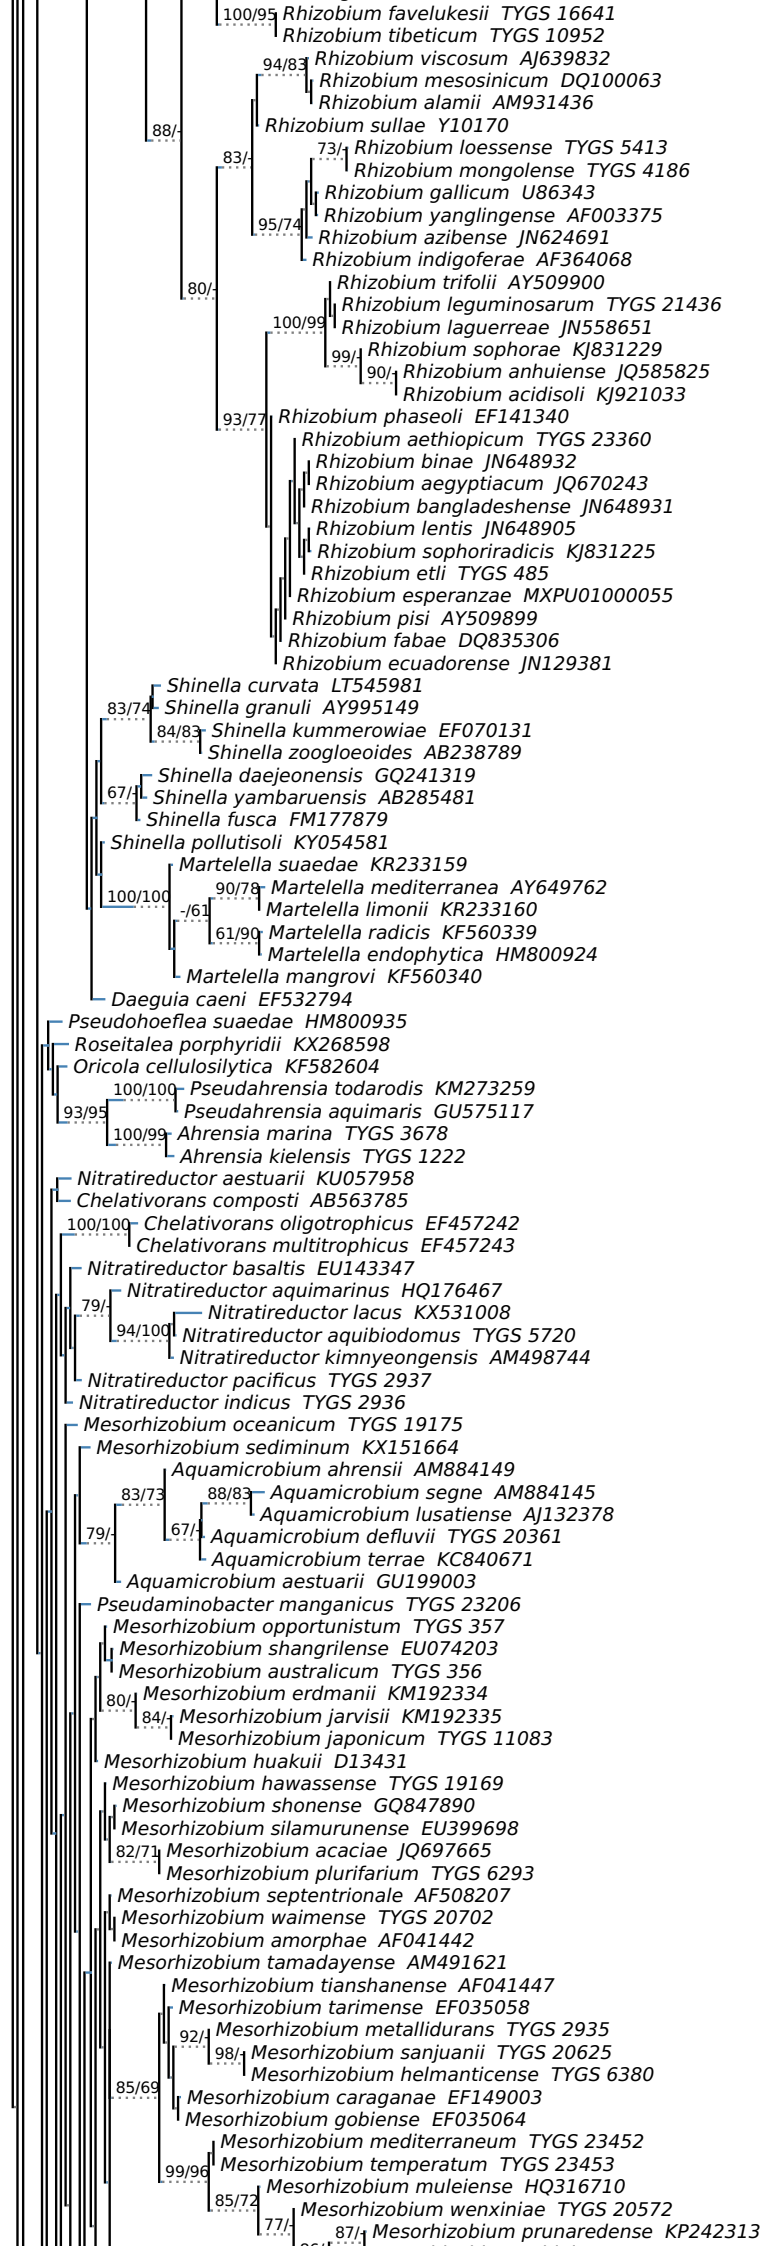

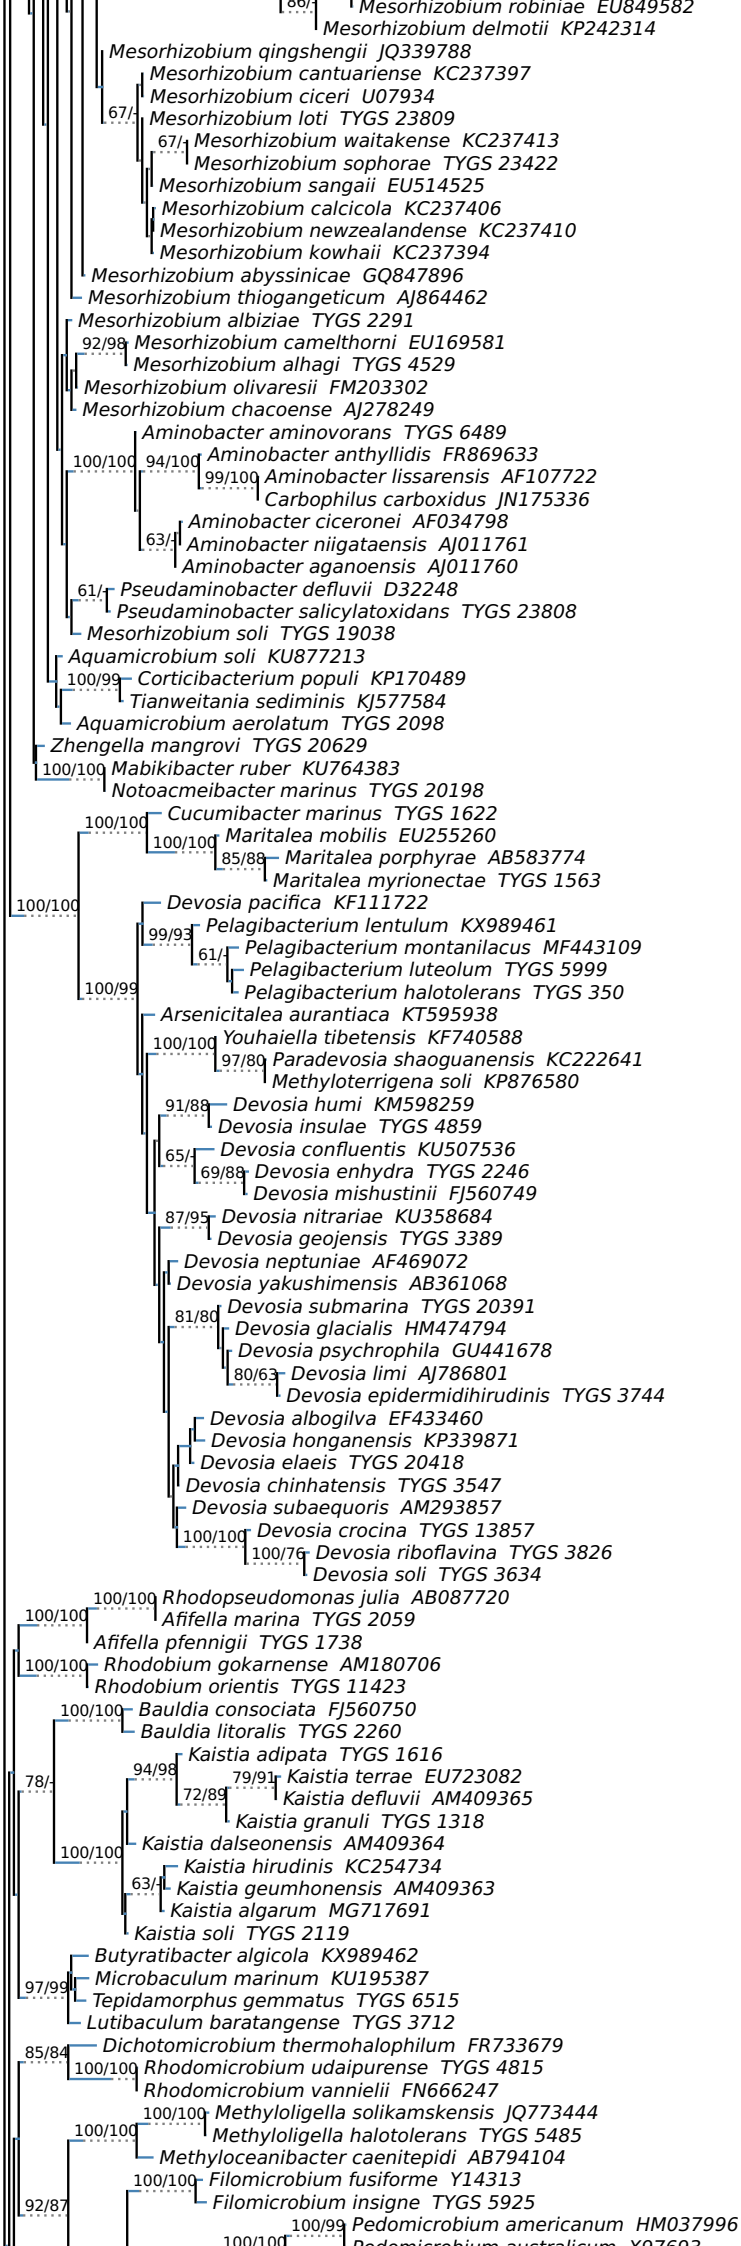

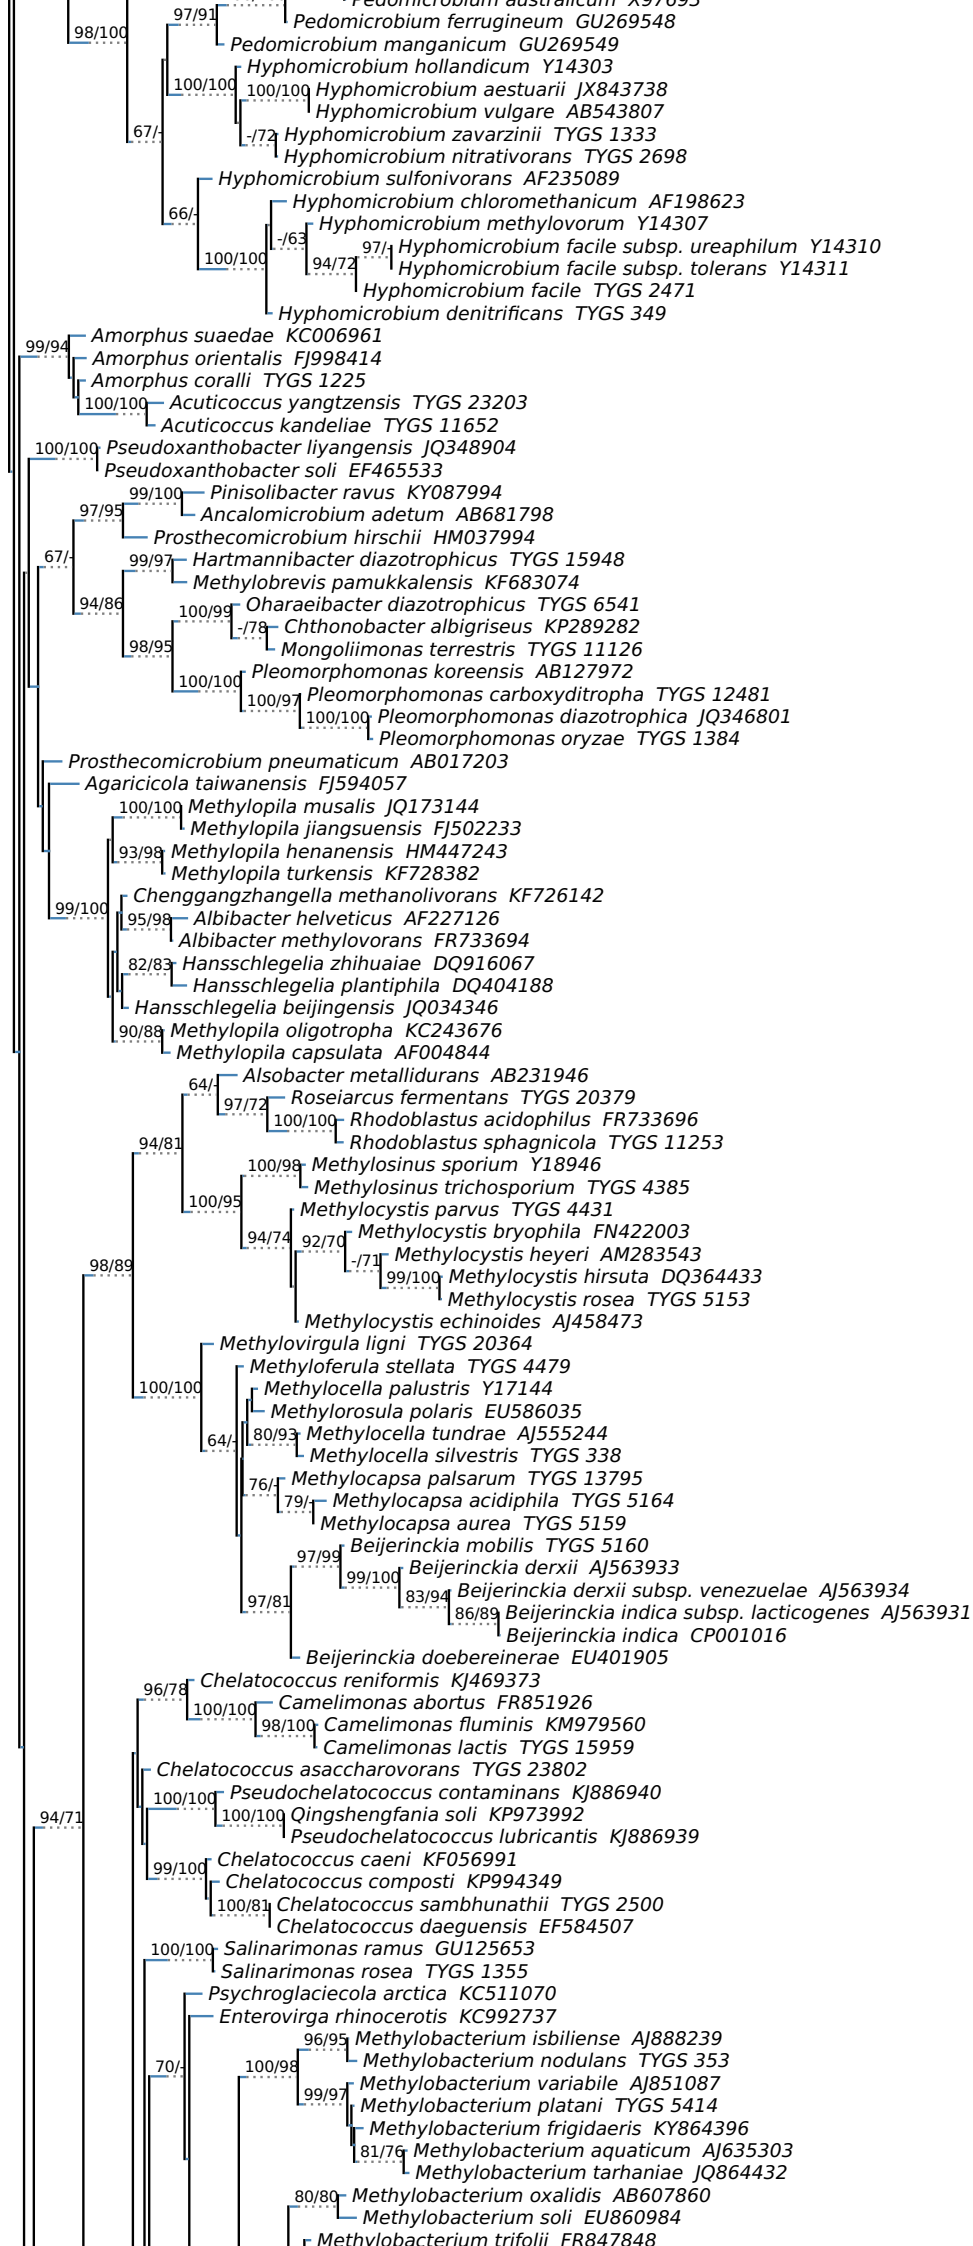

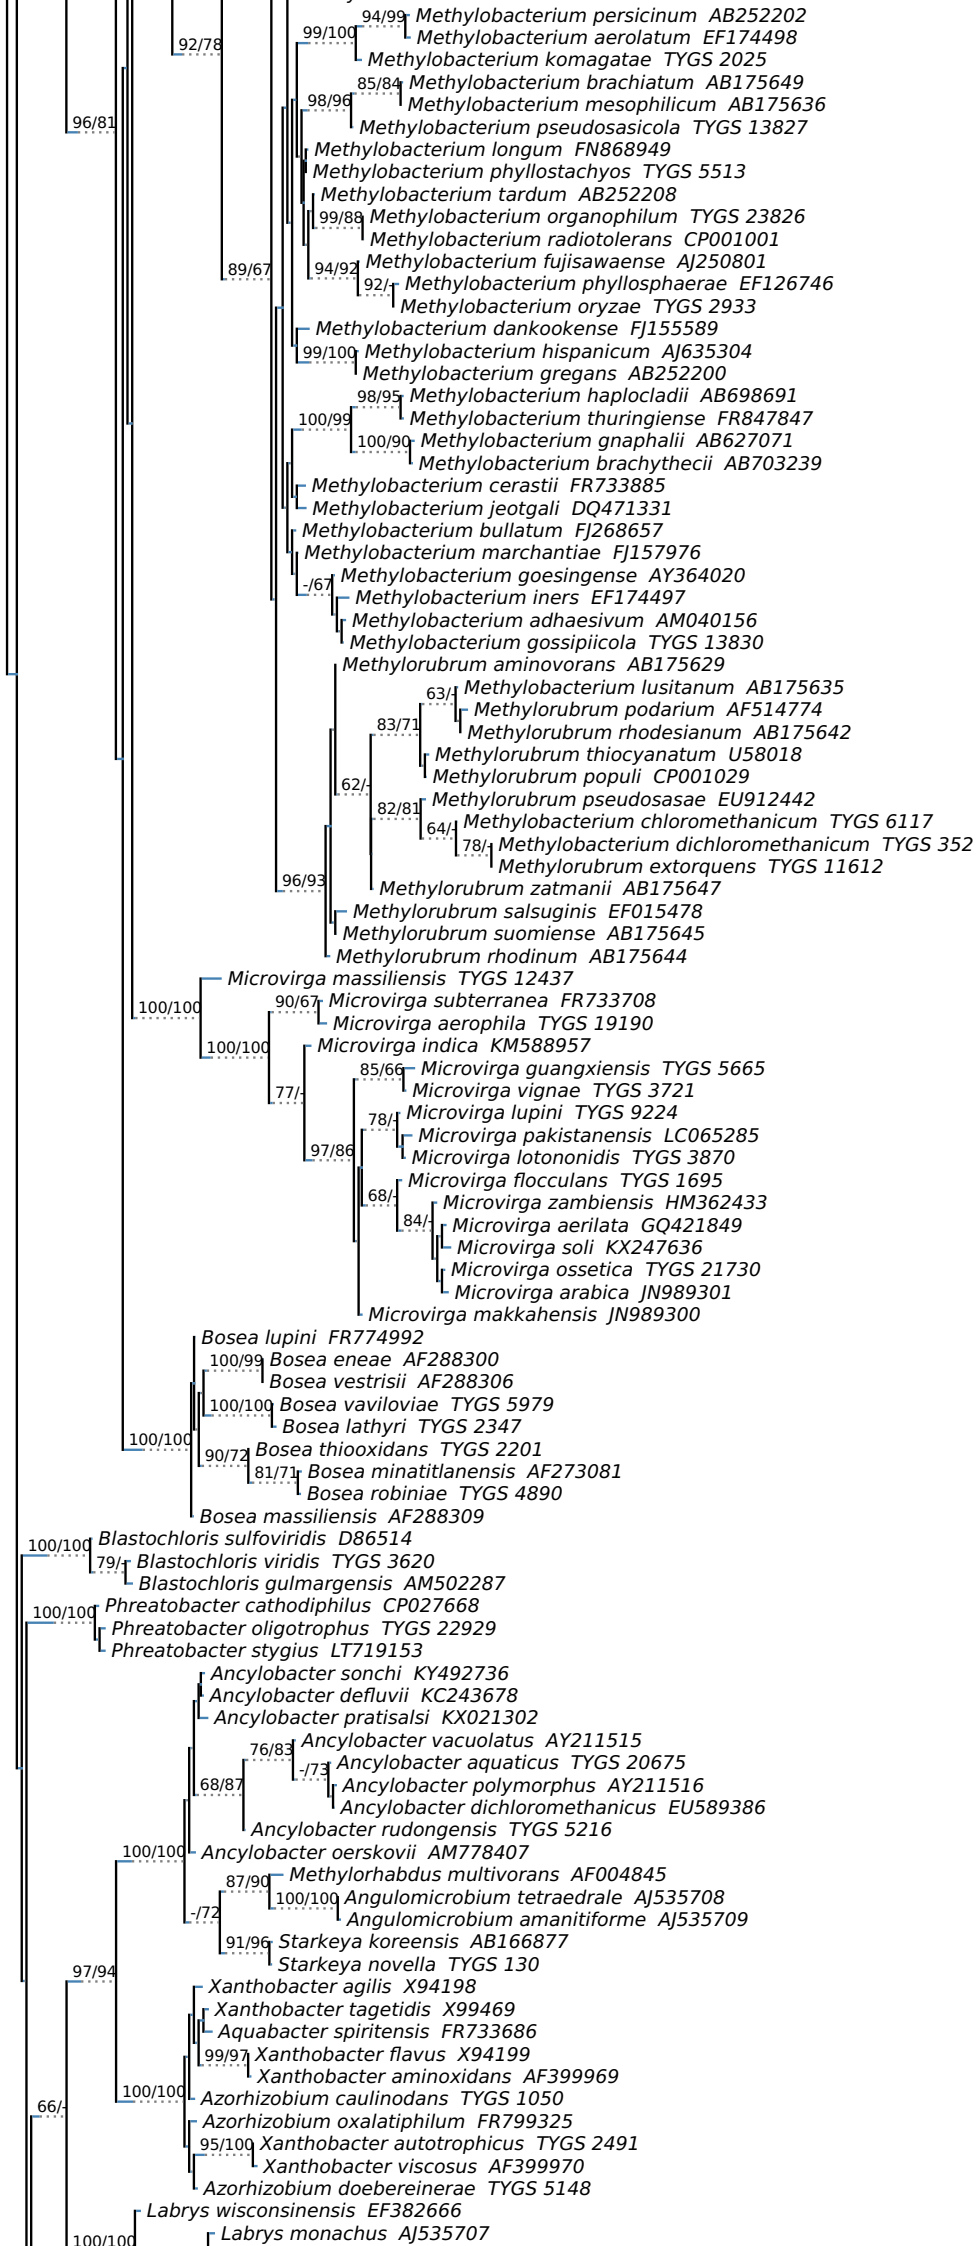

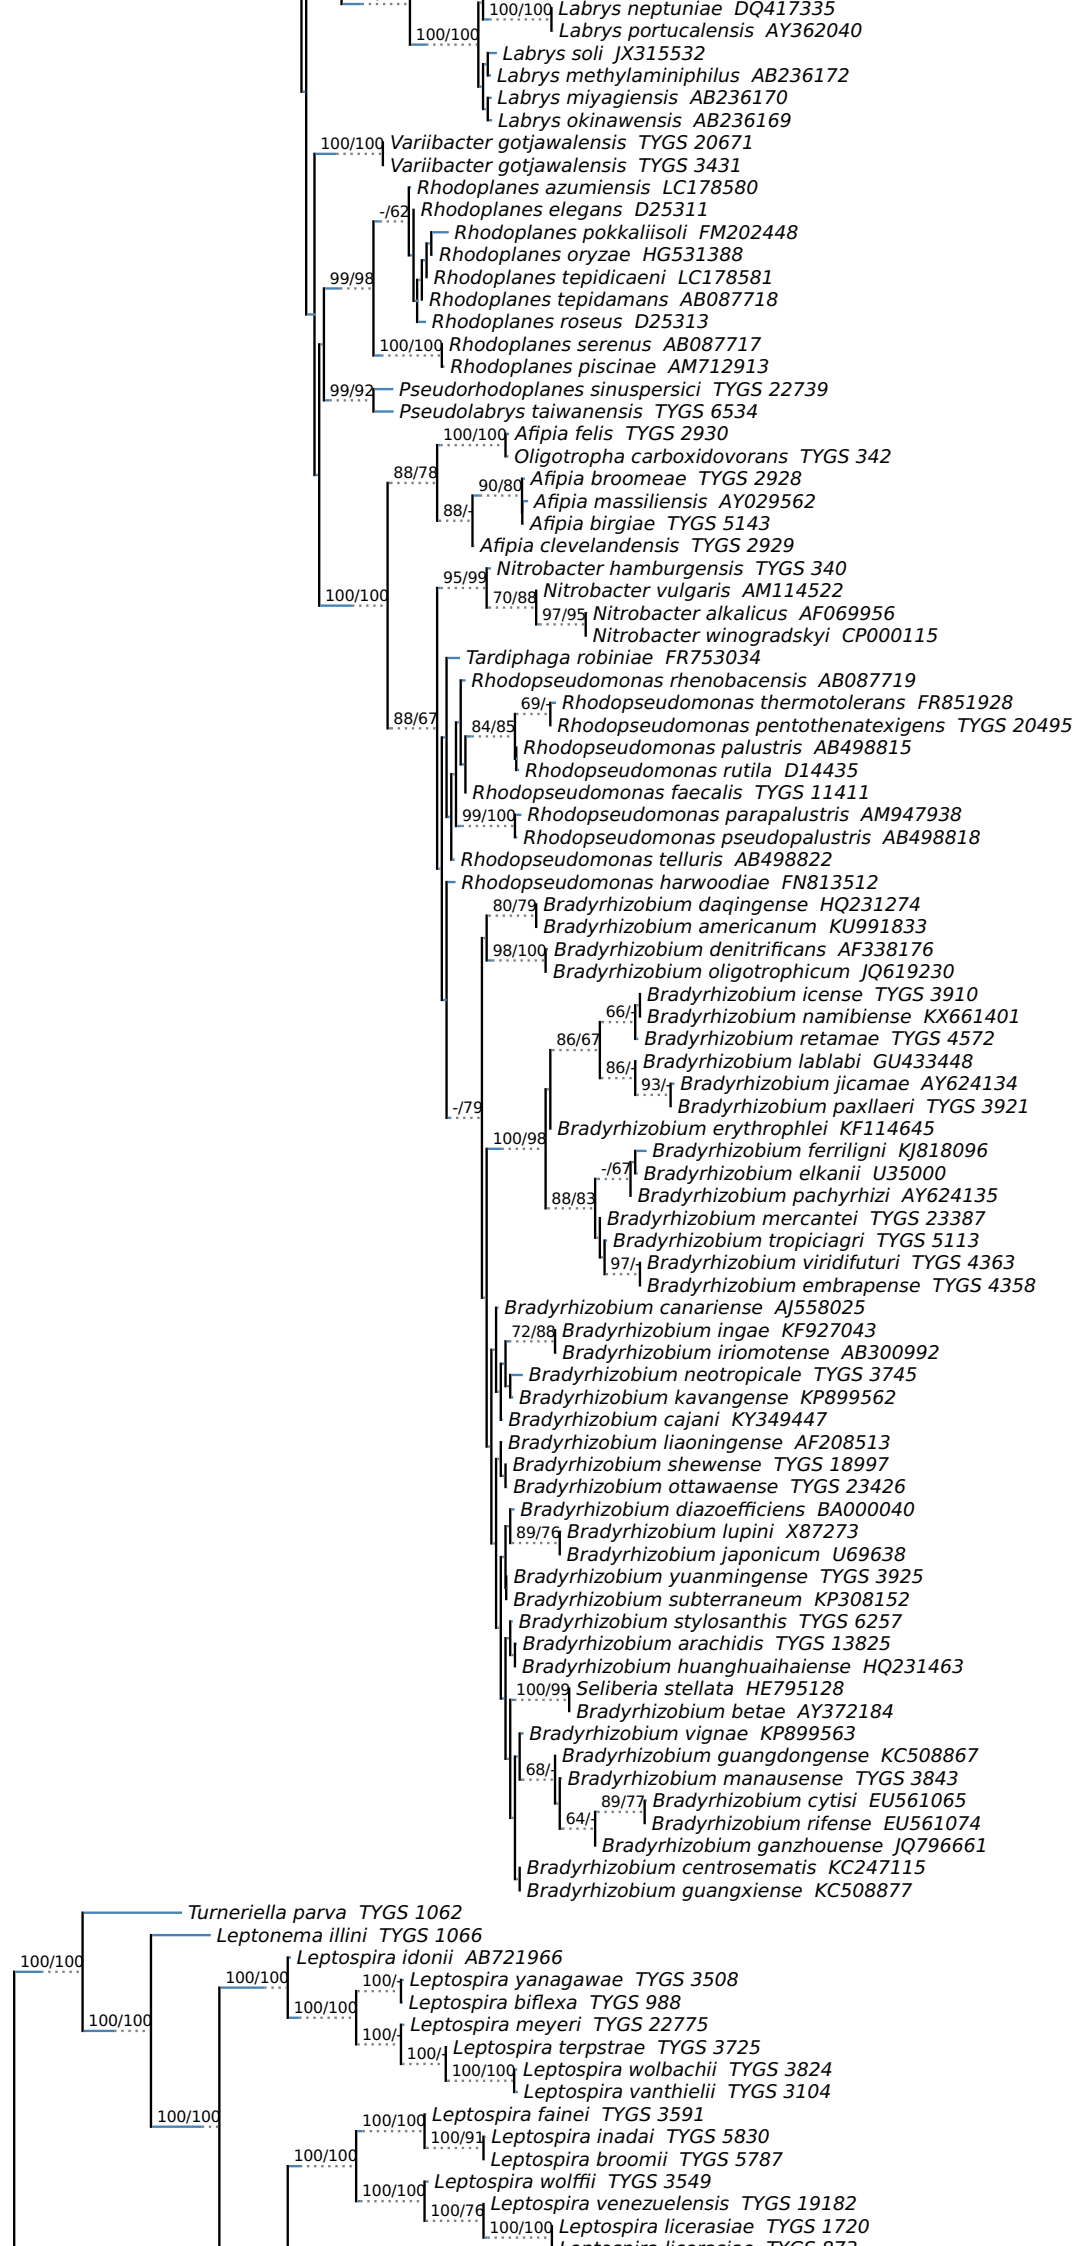

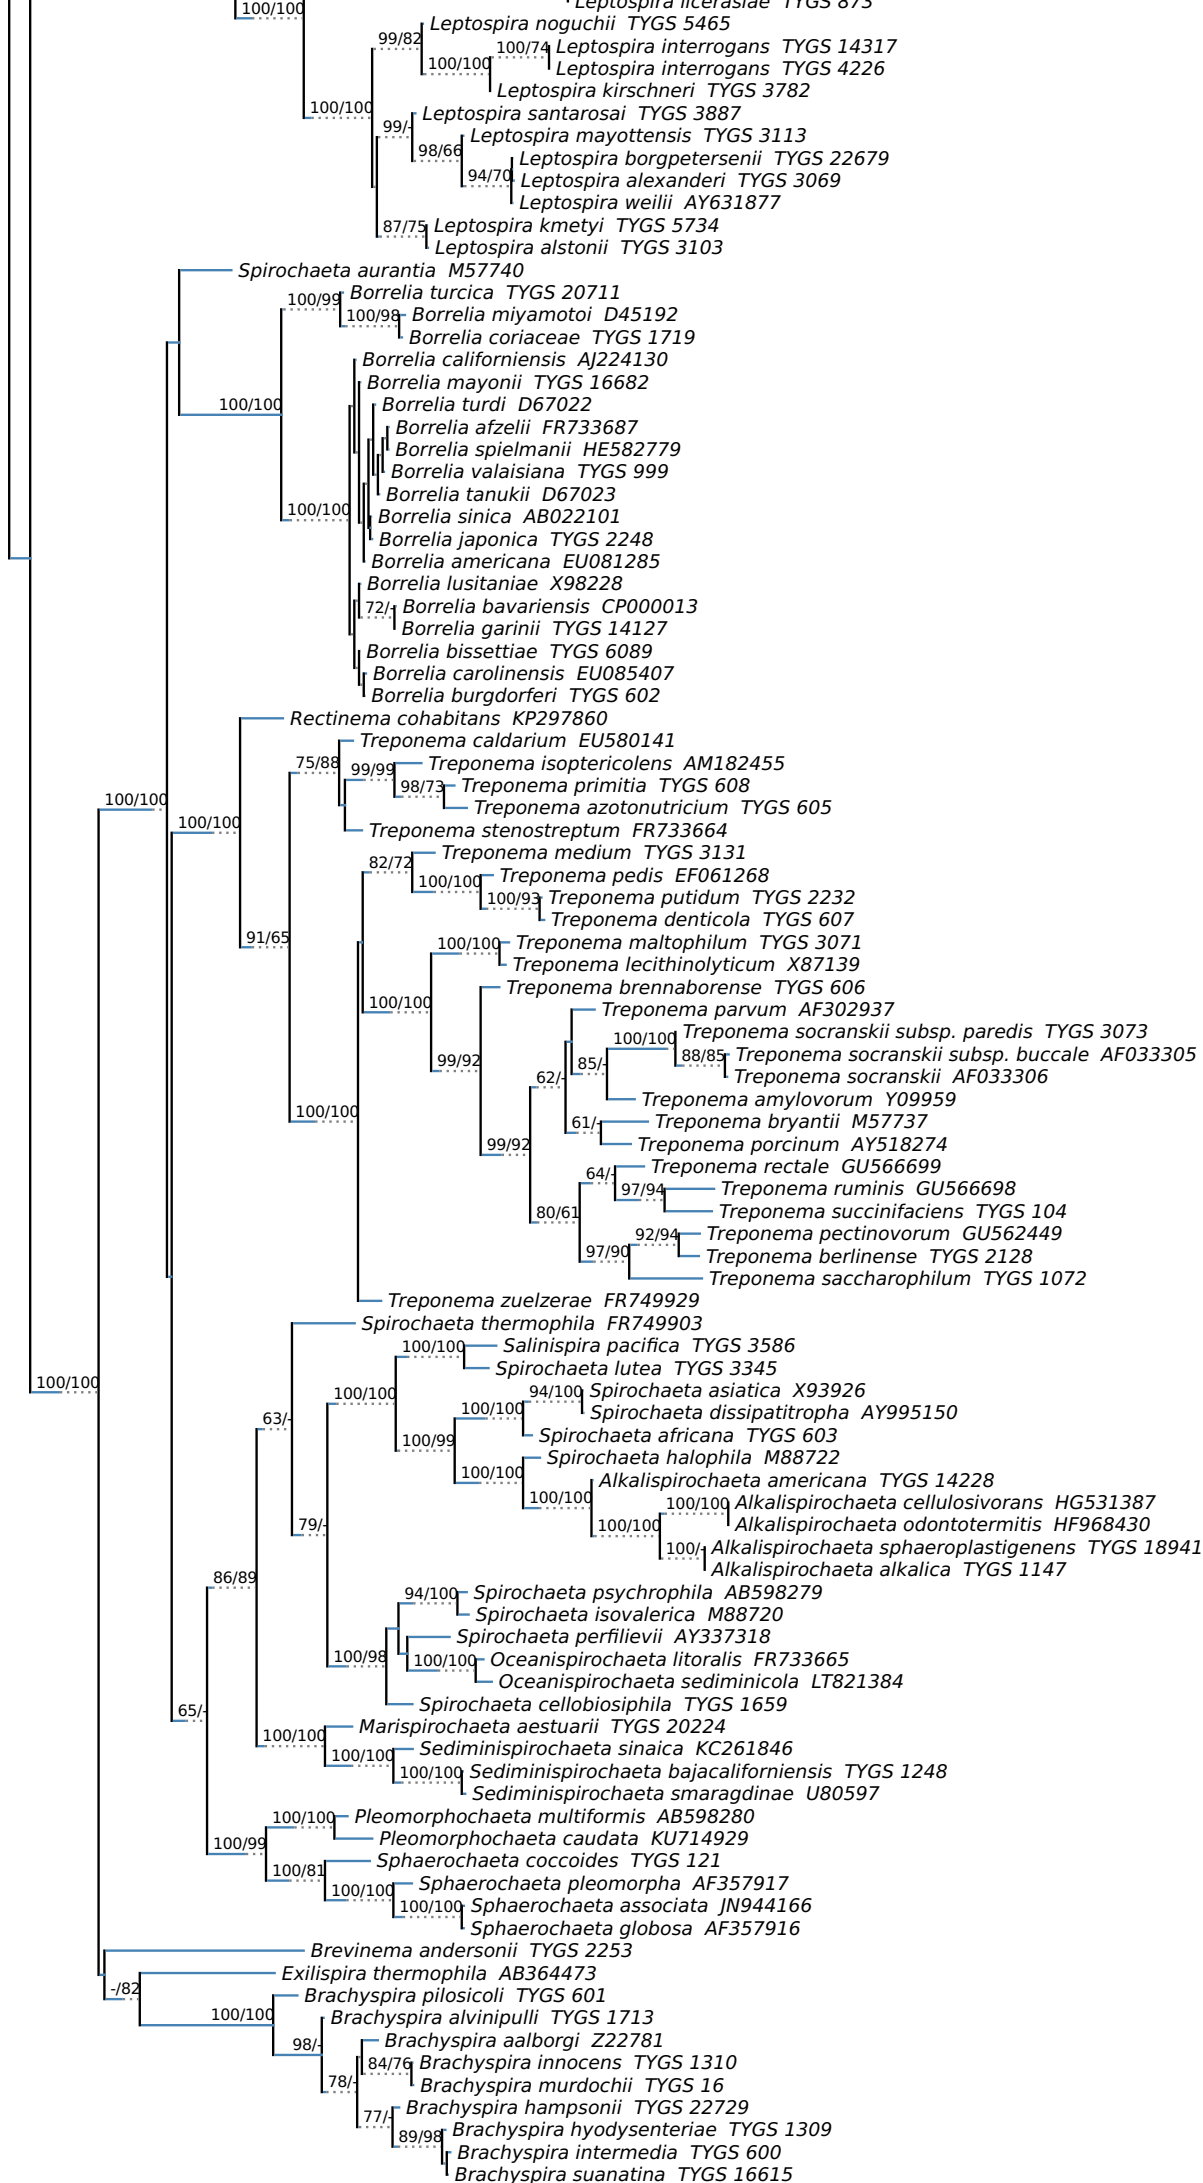

Figure 2: Backbone-constrained comprehensive 16S rRNA gene ML tree (CCT) of *Alphaproteobacteria* inferred under the GTR+CAT model. The branches are scaled in terms of the expected number of substitutions per site. The numbers above the branches are support values when larger than 60% from ML (left) and MP (right) bootstrapping. Dotted parts of branches are filled in to allow proper placement of bootstrap values and are not part of the actual branch length. Numbers preceded by the term 'TYGS' in labels refer to the genome IDs as found in Supplementary Table S1 (first sheet). Each tip label ends with the family of the respective taxon.

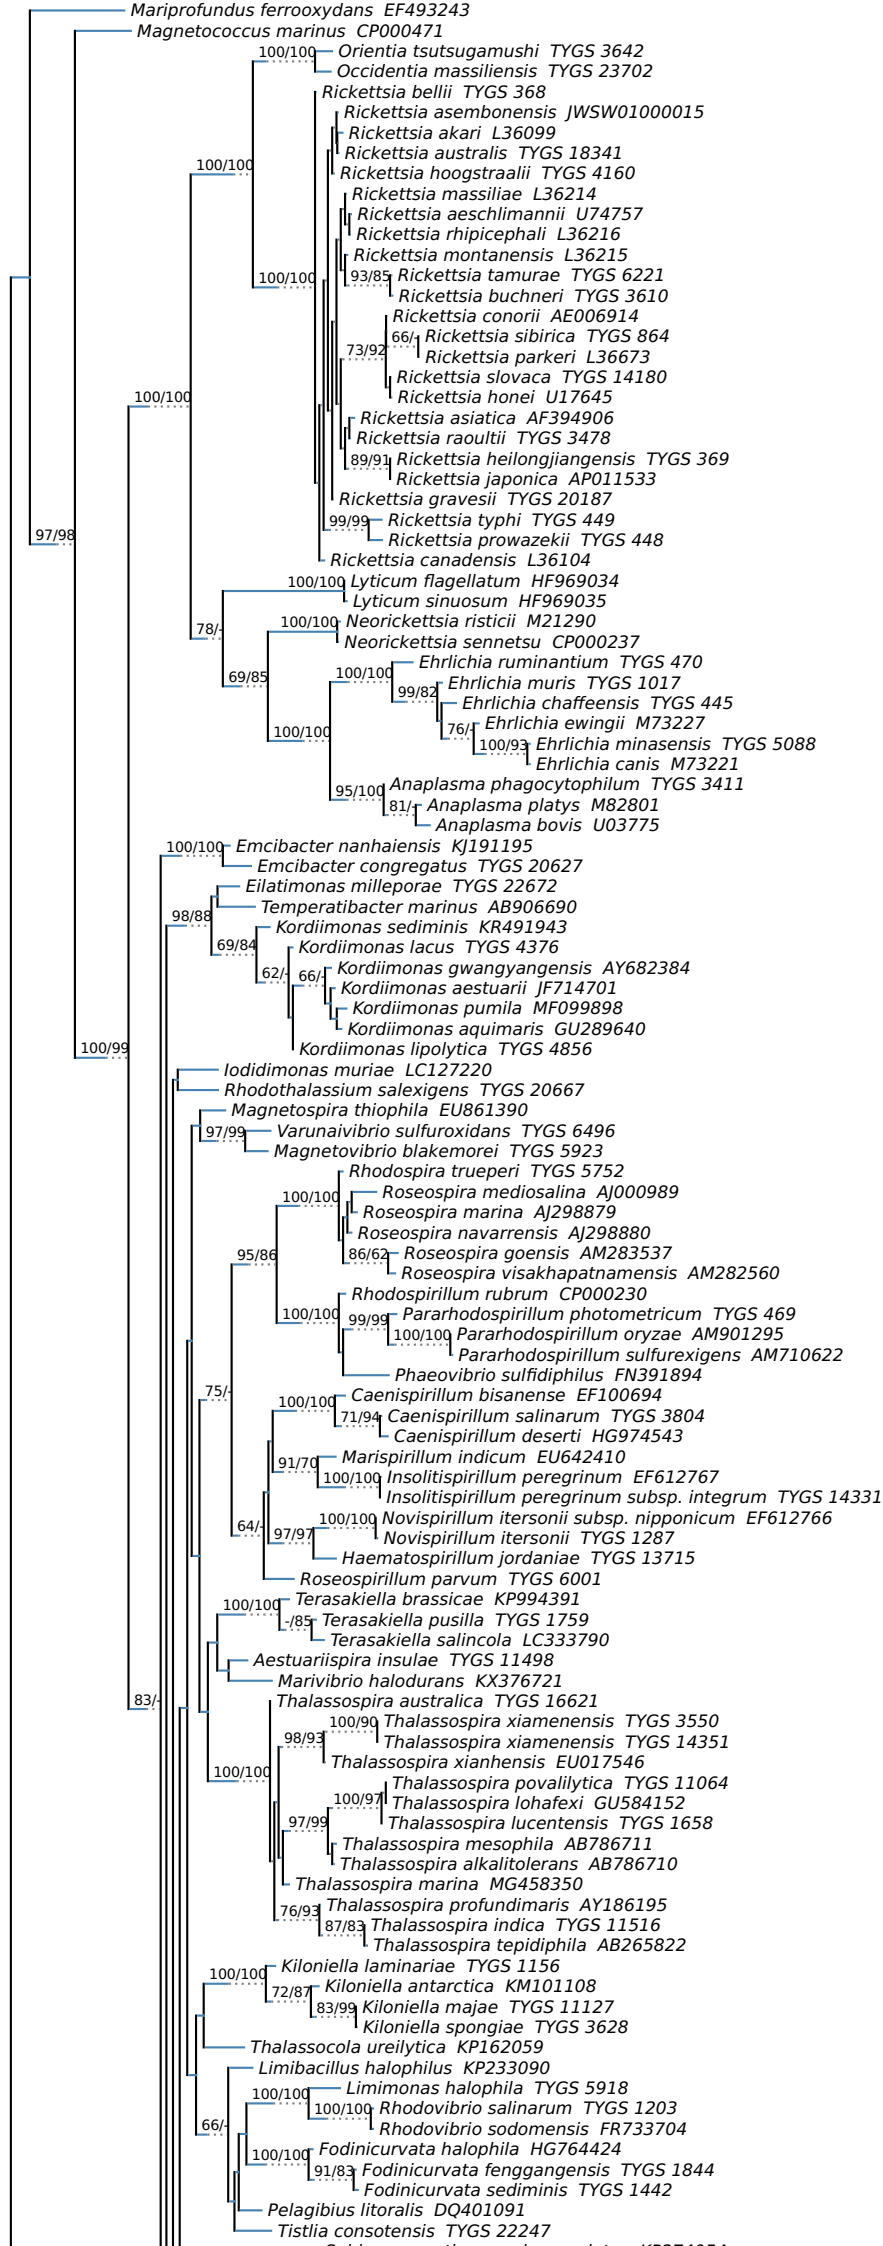

100/100 *Sphingogaurantiacus polygranulatus* KP274054  
84/80 *Sphingogobium fontis* LN890293  
Novosphingobium naphthae KT884900  
Novosphingobium mathurense TYGS 21635  
Novosphingobium pentaromativorans AF502400  
Novosphingobium panipatense EF424402  
Novosphingobium gossypii KP657488  
Novosphingobium guangzhouense KX215153  
Novosphingobium fluoreni KF460450  
Novosphingobium colocasiae HF548595  
97/97 *Blastomonas fulva* TYGS 11093  
65/83 *Blastomonas aquatica* KJ528316  
100/100 *Blastomonas natatoria* TYGS 23790  
Sphingomonas ursincola AB024289  
Rhizorhapis suberifaciens KF437561  
Sphingobium boeckii JN591315  
Sphingomonas colocasiae KU248160  
Sphingomonas indica TYGS 22369  
Sphingomonas vulcanisoli KP859572  
Sphingomonas jatrophae TYGS 11287  
Sphingomonas crusticola TYGS 19227  
85/78 *Sphingomonas laterariae* TYGS 23134  
Sphingomonas haloaromaticamans X94101  
Sphingomonas formosensis HM193517  
100/100 *Sphingomonas montana* TYGS 18994  
Sphingomonas arantia KF876174  
Sphingomonas prati KU535675  
Sphingomonas fennica AJ009706  
74/94 *Sphingomonas histidinilytica* TYGS 21606  
90/72 *Sphingomonas wittichii* AB021492  
90/69 *Rhizorhabdus dicambivorans* TYGS 23557  
Sphingomonas starnbergensis JN591314  
Rhizorhabdus argentea KF437572  
Sphingomonas naphthae KU312690  
Sphingomonas sediminicola AB258386  
85/70 *Sphingomonas daechungensis* JQ772481  
Sphingomonas limnosediminicola HQ436498  
95/85 *Sphingomonas palustris* KR780024  
61/1 *Sphingomonas lutea* JF922305  
96/94 *Sphingomonas agri* KT950747  
Sphingomonas rhizophila KY287249  
Sphingomonas ginsengisoli TYGS 11472  
Sphingomonas oryzae EU707560  
Sphingomonas lacus KF214258  
Sphingomonas kaistensis AY769083  
Sphingomonas astaxanthinifaciens TYGS 1868  
Sphingomonas jaspisi TYGS 1577  
Sphingomonas flava KM658502  
100/100 *Sphingomonas silvisoli* KU597283  
68/1 *Sphingomonas antarctica* KX585266  
Sphingomonas gotjavalisoli LC160264  
100/100 *Sphingomonas jejuensis* HQ224549  
Sphingomonas gimensis JQ608327  
99/100 *Sphingomonas changbaiensis* EU682685  
77/1 *Sphingomonas tabacisoli* MF370621  
Sandaracinobacter sibiricus Y10678  
93/76 *Polymorphobacter multimanifer* AB649056  
97/94 *Polymorphobacter glacialis* KP013180  
99/95 *Polymorphobacter fuscus* KF737330  
95/90 *Sandarakinorhabdus limnophila* TYGS 1372  
96/90 *Sandarakinorhabdus cyanobacteriorum* MG519281  
100/100 *Sphingomonas fonticola* HF544321  
Sphingomonas piscinae LN864675  
Hephaestia caeni TYGS 20367  
95/100 *Sphingomonas sanxanigenens* DQ789172  
Sphingomonas zeicaulis KP172592  
Sphingomonas alpina GQ161989  
Sphingomonas oligophenolica AB018439  
Sphingomonas mali TYGS 4064  
Sphingomonas pruni TYGS 4066  
Sphingomonas asaccharolytica TYGS 4060  
Sphingomonas soli TYGS 4069  
Sphingomonas hengshuiensis TYGS 3412  
97/81 *Sphingomonas turrisvirgatae* TYGS 20705  
Sphingomonas koreensis TYGS 4063  
Sphingomonas leidy AJ227812  
Sphingomonas kyeonggiensis KC252615  
84/78 *Sphingomonas naasensis* KC735149  
Sphingomonas gei KF551181  
Sphingomonas aquatica KT309085  
Sphingomonas aestuarii TYGS 2090  
92/86 *Sphingomonas desiccabilis* AJ871435  
Sphingomonas molluscorum AB248285  
95/98 *Sphingomonas hankookensis* FJ194436  
Sphingomonas panni AJ575818  
Sphingomonas frigidaeris KY873312  
84/84 *Sphingomonas spermidinifaciens* TYGS 11010  
Sphingomonas yangtingensis JX566547  
Sphingomonas japonica AB428568  
Sphingomonas guangdongensis TYGS 23602  
97/100 *Sphingomonas azotifigens* TYGS 21935  
Sphingomonas pituitosa AJ243751  
Sphingomonas trueperi X97776  
Sphingomonas aerophila KC735148  
Sphingomonas carri KP185150  
Sphingomonas jeddahensis TYGS 11161  
Sphingomonas xinjiangensis FJ754464  
100/100 *Sphingomonas panaciterrae* KF915801  
77/1 *Sphingomonas olei* KX672814  
100/100 *Sphingomonas faeni* TYGS 6388  
86/1 *Sphingomonas aerolata* TYGS 6384  
Sphingomonas aurantiaca TYGS 6414  
Sphingomonas mucosissima TYGS 22972  
Sphingomonas dokdonensis TYGS 22970  
Sphingomonas difficilis JQ608334  
99/98 *Sphingomonas polyaromaticivorans* EF467848  
Sphingomonas morindae KJ934256  
Sphingomonas oligoaromaticivorans FJ434127  
88/72 *Sphingomonas paucimobilis* TYGS 2947  
Sphingomonas zeae KP999966

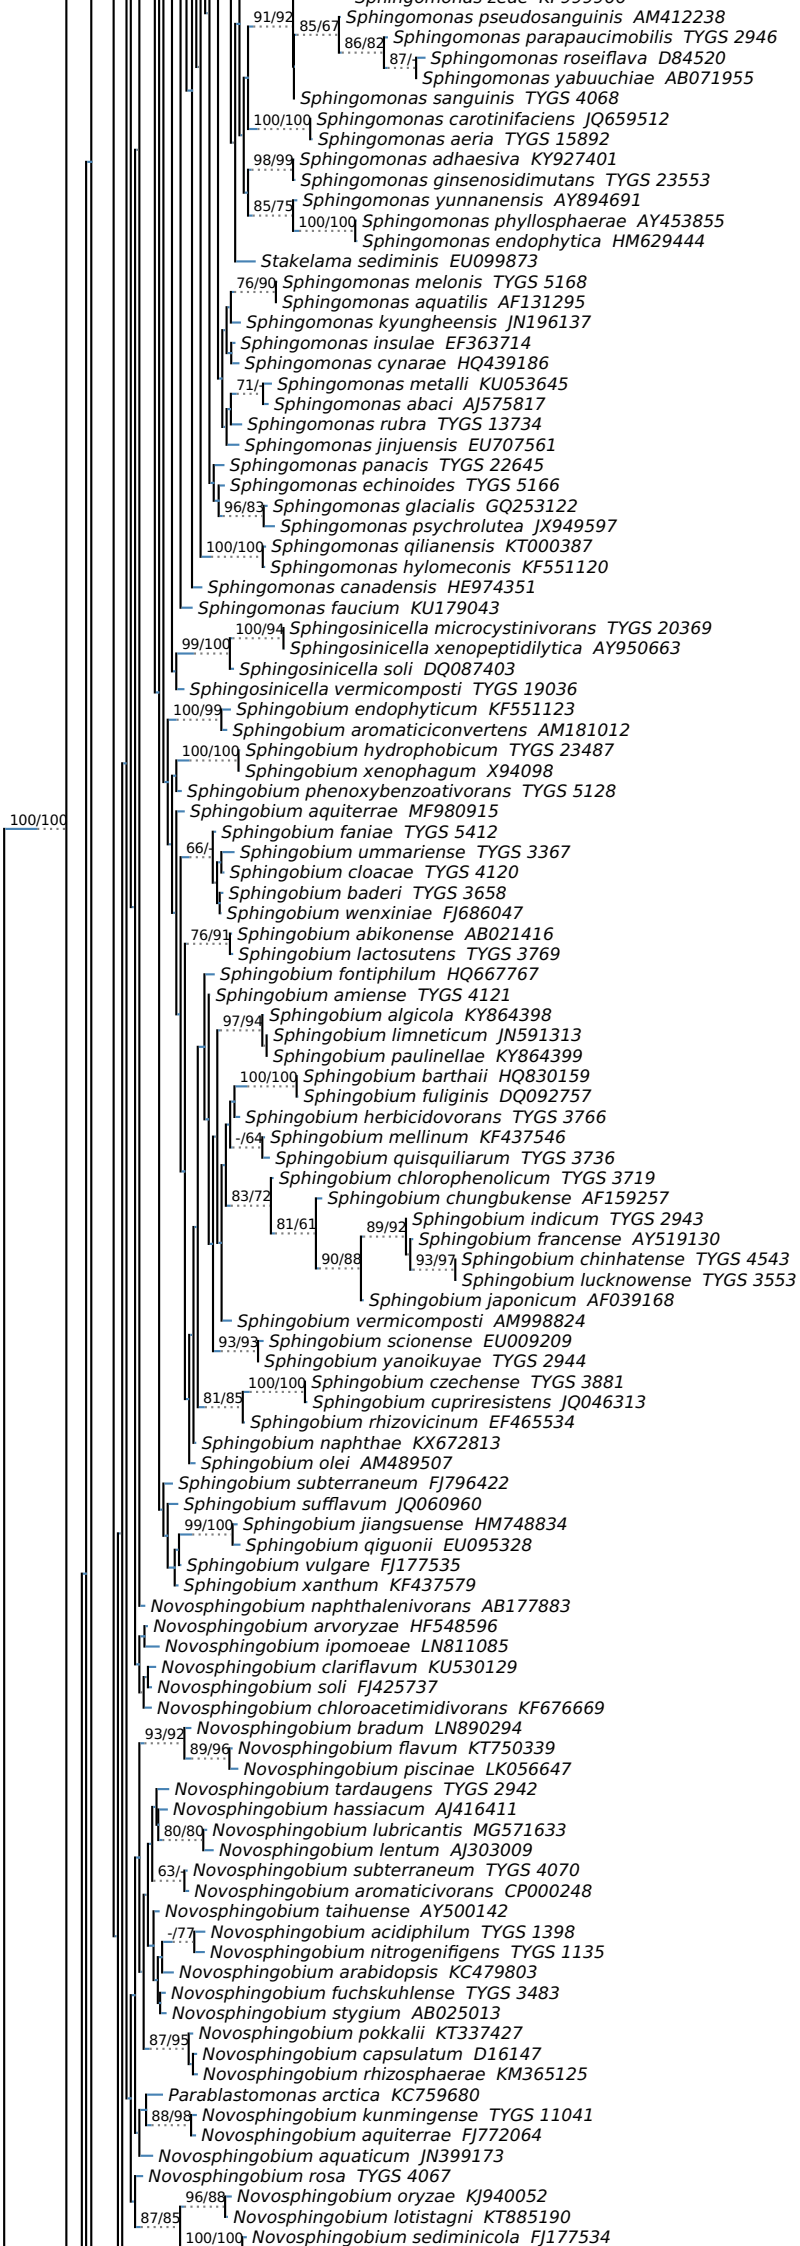

Novosphingobium resinovorum KY658458  
98/100 Novosphingobium resinovorum EF029110  
Novosphingobium subarcticum TYGS 3250  
Novosphingobium barchaimii TYGS 3541  
Novosphingobium lindaniclasticum TYGS 3440  
Novosphingobium endophyticum KP721487  
Novosphingobium marinum KJ708552  
Novosphingobium indicum EF549586  
Novosphingobium malaysiense TYGS 3352  
Altererythrobacter xixiisoli KJ150597  
Porphyrobacter mercurialis KP122961  
Altererythrobacter atlanticus TYGS 3754  
97/100 Altererythrobacter lauratis KX808673  
89/75 Altererythrobacter palmitatis KX808674  
Altererythrobacter buctensis KJ599648  
Altererythrobacter salegens KT886062  
Altererythrobacter ishigakiensis TYGS 2240  
Altererythrobacter flavus KX099616  
Altererythrobacter mangrovi TYGS 11247  
Altererythrobacter oceanensis KF924606  
Erythrobacter jejuensis DQ453142  
98/100 Sphingomicrobium arenosum MH091576  
73/90 Sphingomicrobium astaxanthinifaciens JX235675  
99/100 Sphingomicrobium aestuariivivum KM591917  
99/94 Sphingomicrobium marinum JX235672  
Sphingomicrobium flavum JX393854  
Sphingomicrobium lutaoense EU564841  
Altererythrobacter aurantiacus KF924607  
80/1 Erythrobacter nanhaiediminis TYGS 13859  
96/92 Erythrobacter longus TYGS 3534  
Erythrobacter aquimaris AY461441  
Erythrobacter citreus AF118020  
Erythrobacter arachoides KU302715  
Erythrobacter xanthus TYGS 15916  
Erythrobacter luteus TYGS 3710  
100/100 Erythrobacter atlanticus KP994305  
Erythrobacter marinus TYGS 4345  
66/85/80 Erythrobacter aquimixticola TYGS 12553  
Erythrobacter gangjinensis TYGS 3608  
Erythrobacter odishensis TYGS 11659  
Erythrobacter seohaensis TYGS 11008  
67/ Erythrobacter pelagi HQ203045  
Erythrobacter lutimaris TYGS 20518  
Erythrobacter flavus AF500004  
Erythrobacter vulgaris AY706935  
Erythrobacter litoralis TYGS 3734  
Porphyrobacter colymbi TYGS 22840  
Porphyrobacter neustonensis AB033327  
Porphyrobacter tepidarius AB033328  
Erythromicrobium ramosum AF465837  
Porphyrobacter sanguineus AB021493  
Porphyrobacter donghaensis TYGS 22841  
Porphyrobacter dokdonensis TYGS 5936  
Porphyrobacter cryptus TYGS 1385  
Erythrobacter gaetbulli AY562220  
Porphyrobacter algicida KU981071  
61/ Altererythrobacter aestuarii FJ997597  
97/79 Blastomonas marina KX250272  
Altererythrobacter halimionae KY310593  
Altererythrobacter namhicola TYGS 5886  
Altererythrobacter epoxidivorans DQ304436  
Altererythrobacter xiamenensis TYGS 22784  
Altererythrobacter luteolus AY739662  
66/ Altererythrobacter aestiaquae KJ658262  
Altererythrobacter aquaemixtae KY614064  
96/89 Altererythrobacter gangjinensis JF751048  
Altererythrobacter aquagigeris KX812543  
97/97 Altererythrobacter sediminis KP779619  
Altererythrobacter confluentis KX129915  
Altererythrobacter indicus DQ399262  
Altererythrobacter endophyticus KY310591  
Altererythrobacter marinus EU726272  
Altererythrobacter marensis TYGS 3349  
Altererythrobacter fulvus KY117470  
Altererythrobacter dongtanensis TYGS 5696  
98/89 Croceicoccus mobilis TYGS 17506  
Croceicoccus pelagius TYGS 17499  
Croceicoccus naphthovorans TYGS 3498  
Croceicoccus marinus TYGS 5804  
Altererythrobacter troitsensis TYGS 4373  
83/74 Qipengyuania sediminis KJ734993  
77/ Altererythrobacter aerius KU311004  
83/79 Altererythrobacter deserti KY287245  
Altererythrobacter rigui KP997219  
61/ Altererythrobacter xinjiangensis HM028673  
Altererythrobacter soli KT906300  
77/ Sphingopyxis soli FJ599671  
84/81 Sphingopyxis flava TYGS 21639  
76/ Sphingopyxis panaciterrulae EU075217  
Sphingopyxis indica TYGS 23121  
Sphingopyxis granuli TYGS 4072  
Sphingopyxis nepalensis MF405104  
Sphingopyxis ginsengisoli AB245343  
Sphingopyxis taejonensis AF131297  
Sphingopyxis solisilvae KX672815  
Sphingopyxis italica HE648058  
66/ Sphingopyxis chilensis AF367204  
95/95 Sphingopyxis alaskensis TYGS 372  
Sphingopyxis panaciterrae AB245353  
Sphingopyxis fribergensis TYGS 3522  
Sphingopyxis witflariensis AJ416410  
Sphingopyxis bauzanensis GQ131578  
Sphingopyxis macrogoltabida TYGS 3603  
95/99 Sphingopyxis terrae TYGS 2948  
Sphingopyxis terrae subsp. ummariensis NWUR01000014  
Sphingorhabdus arenilitoris KJ452169  
89/98 Sphingorhabdus wooponensis HQ436493  
100/100 Sphingorhabdus planktonica JN381068  
Sphingorhabdus rigui HQ436492  
76/ Sphingorhabdus buctiana KJ667149

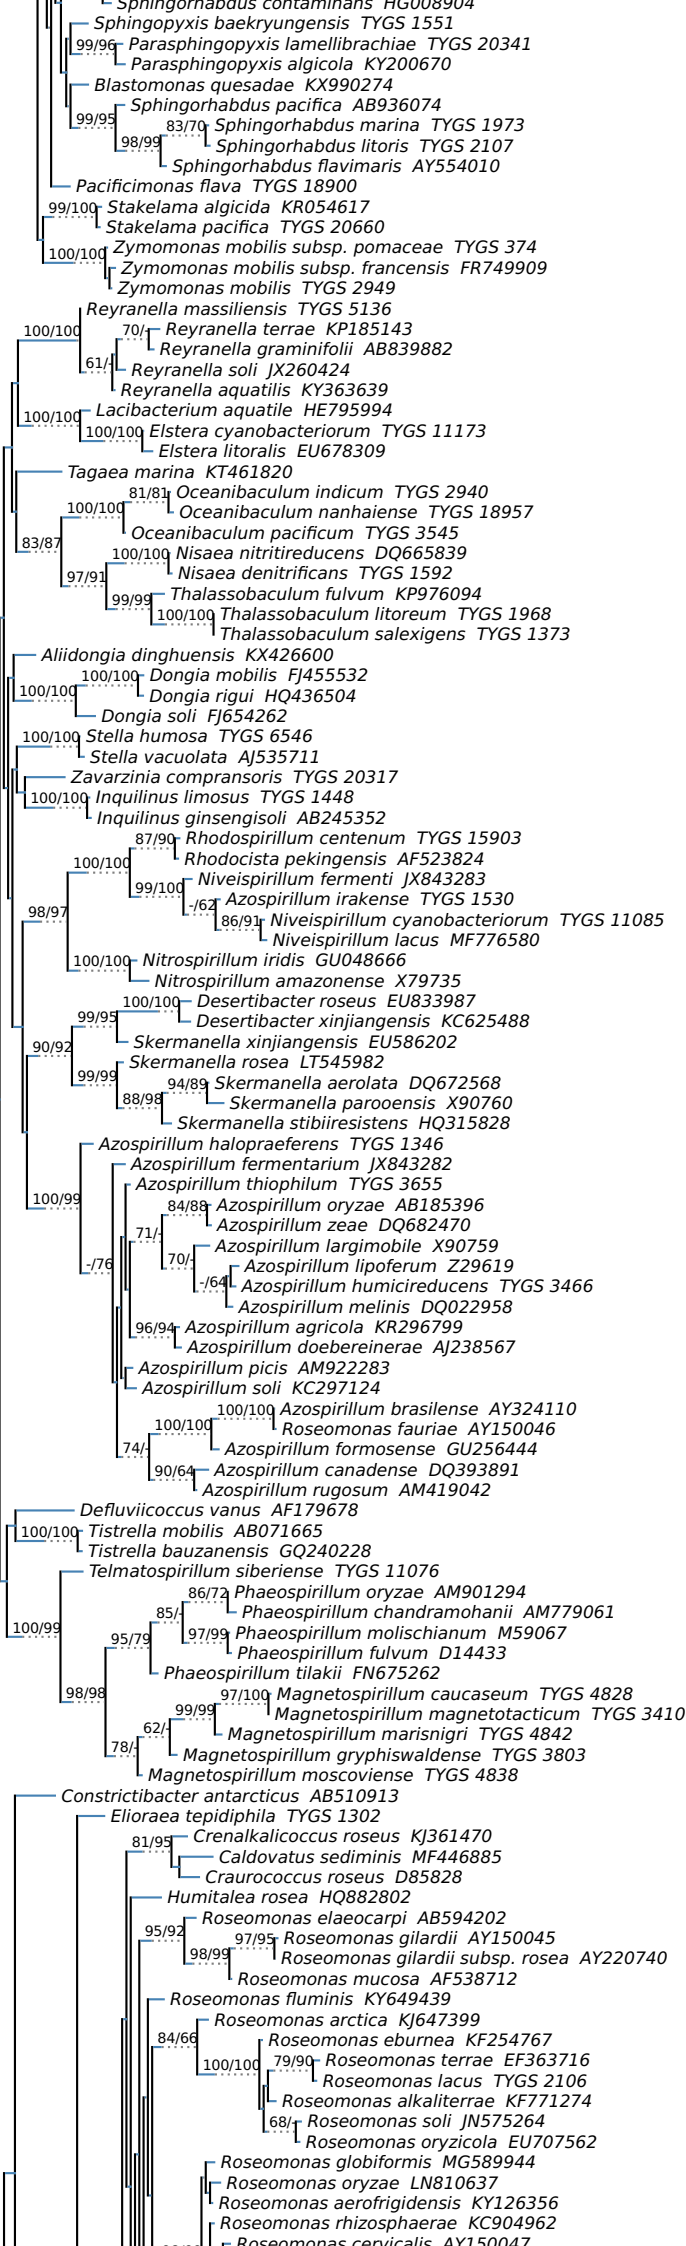

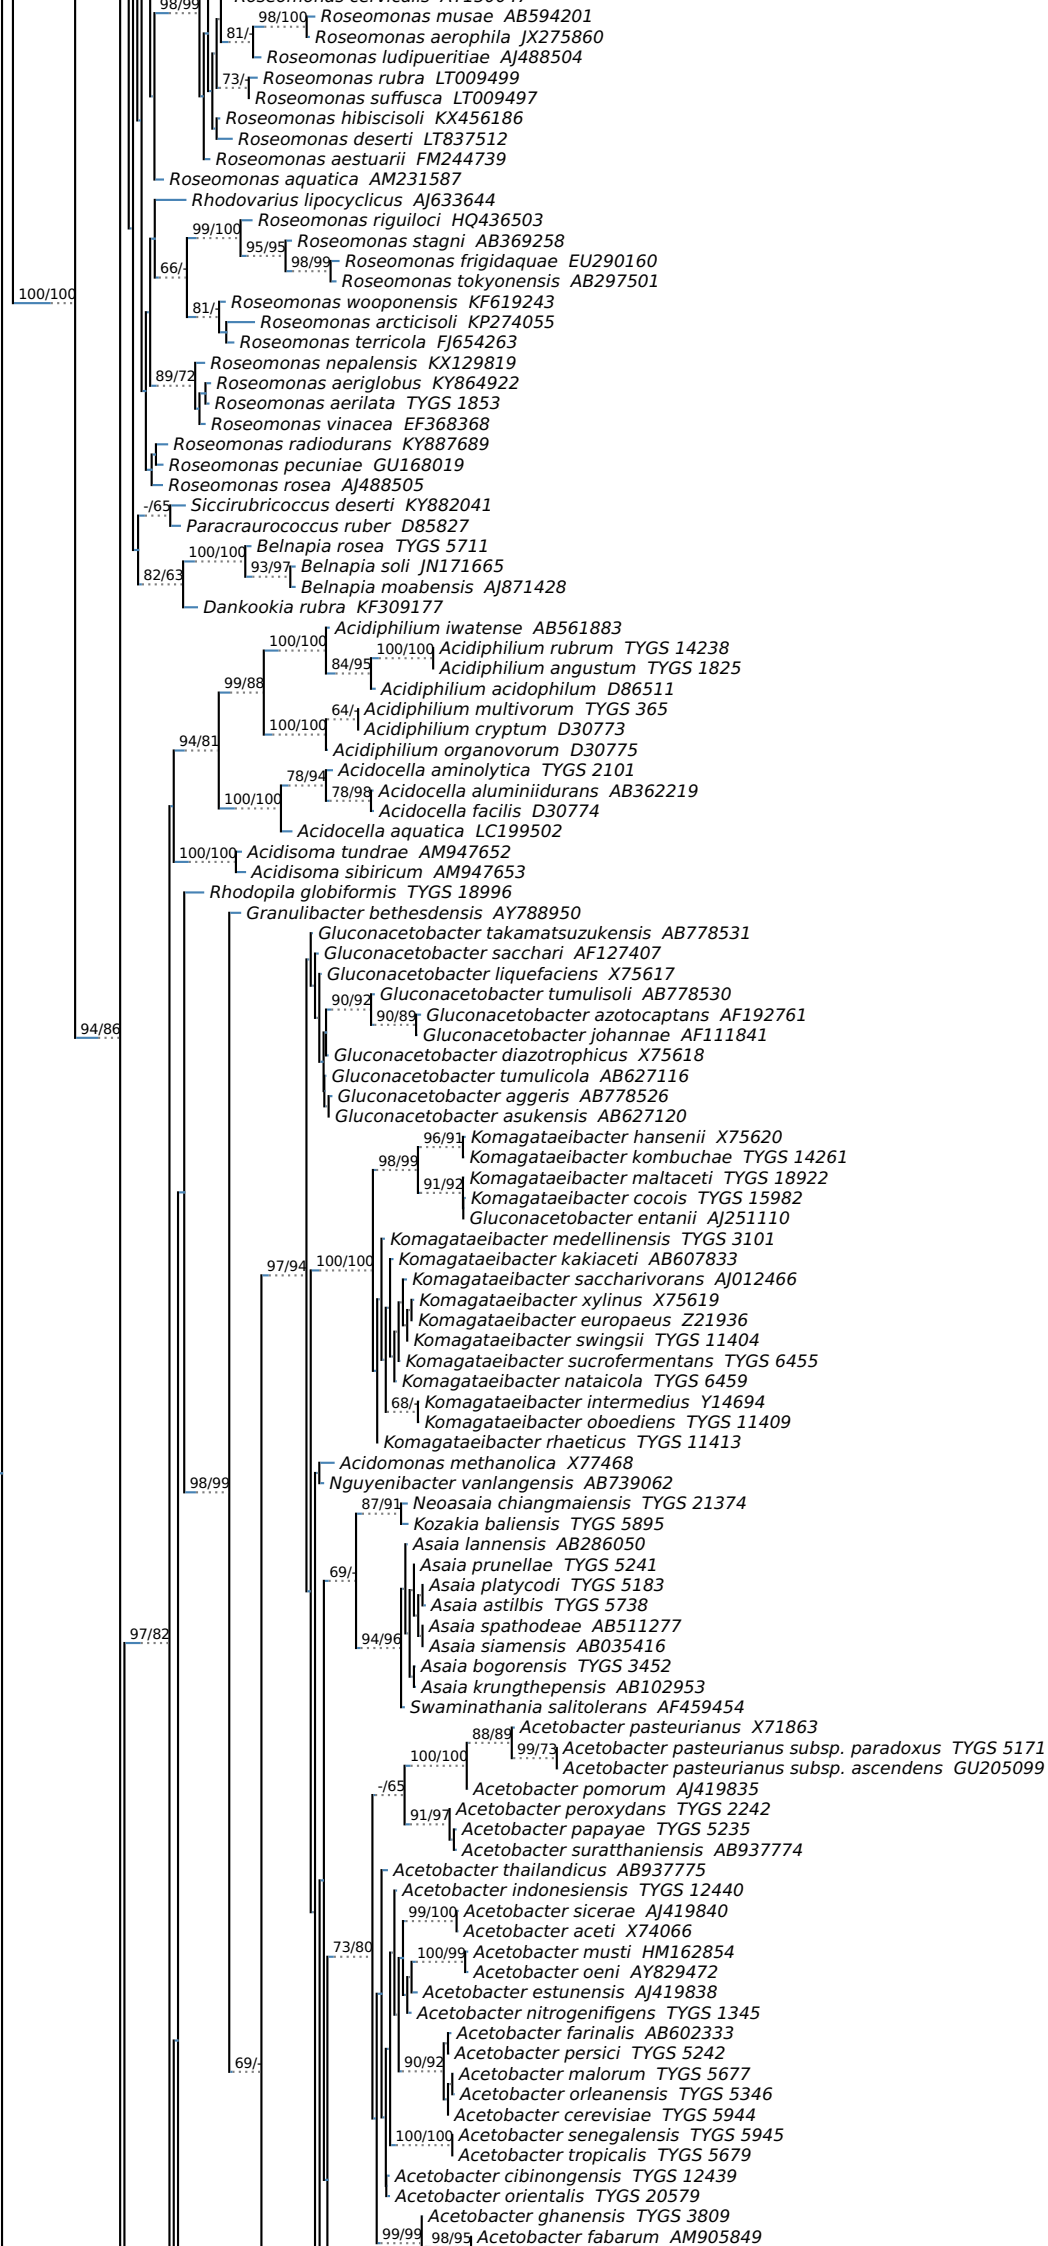

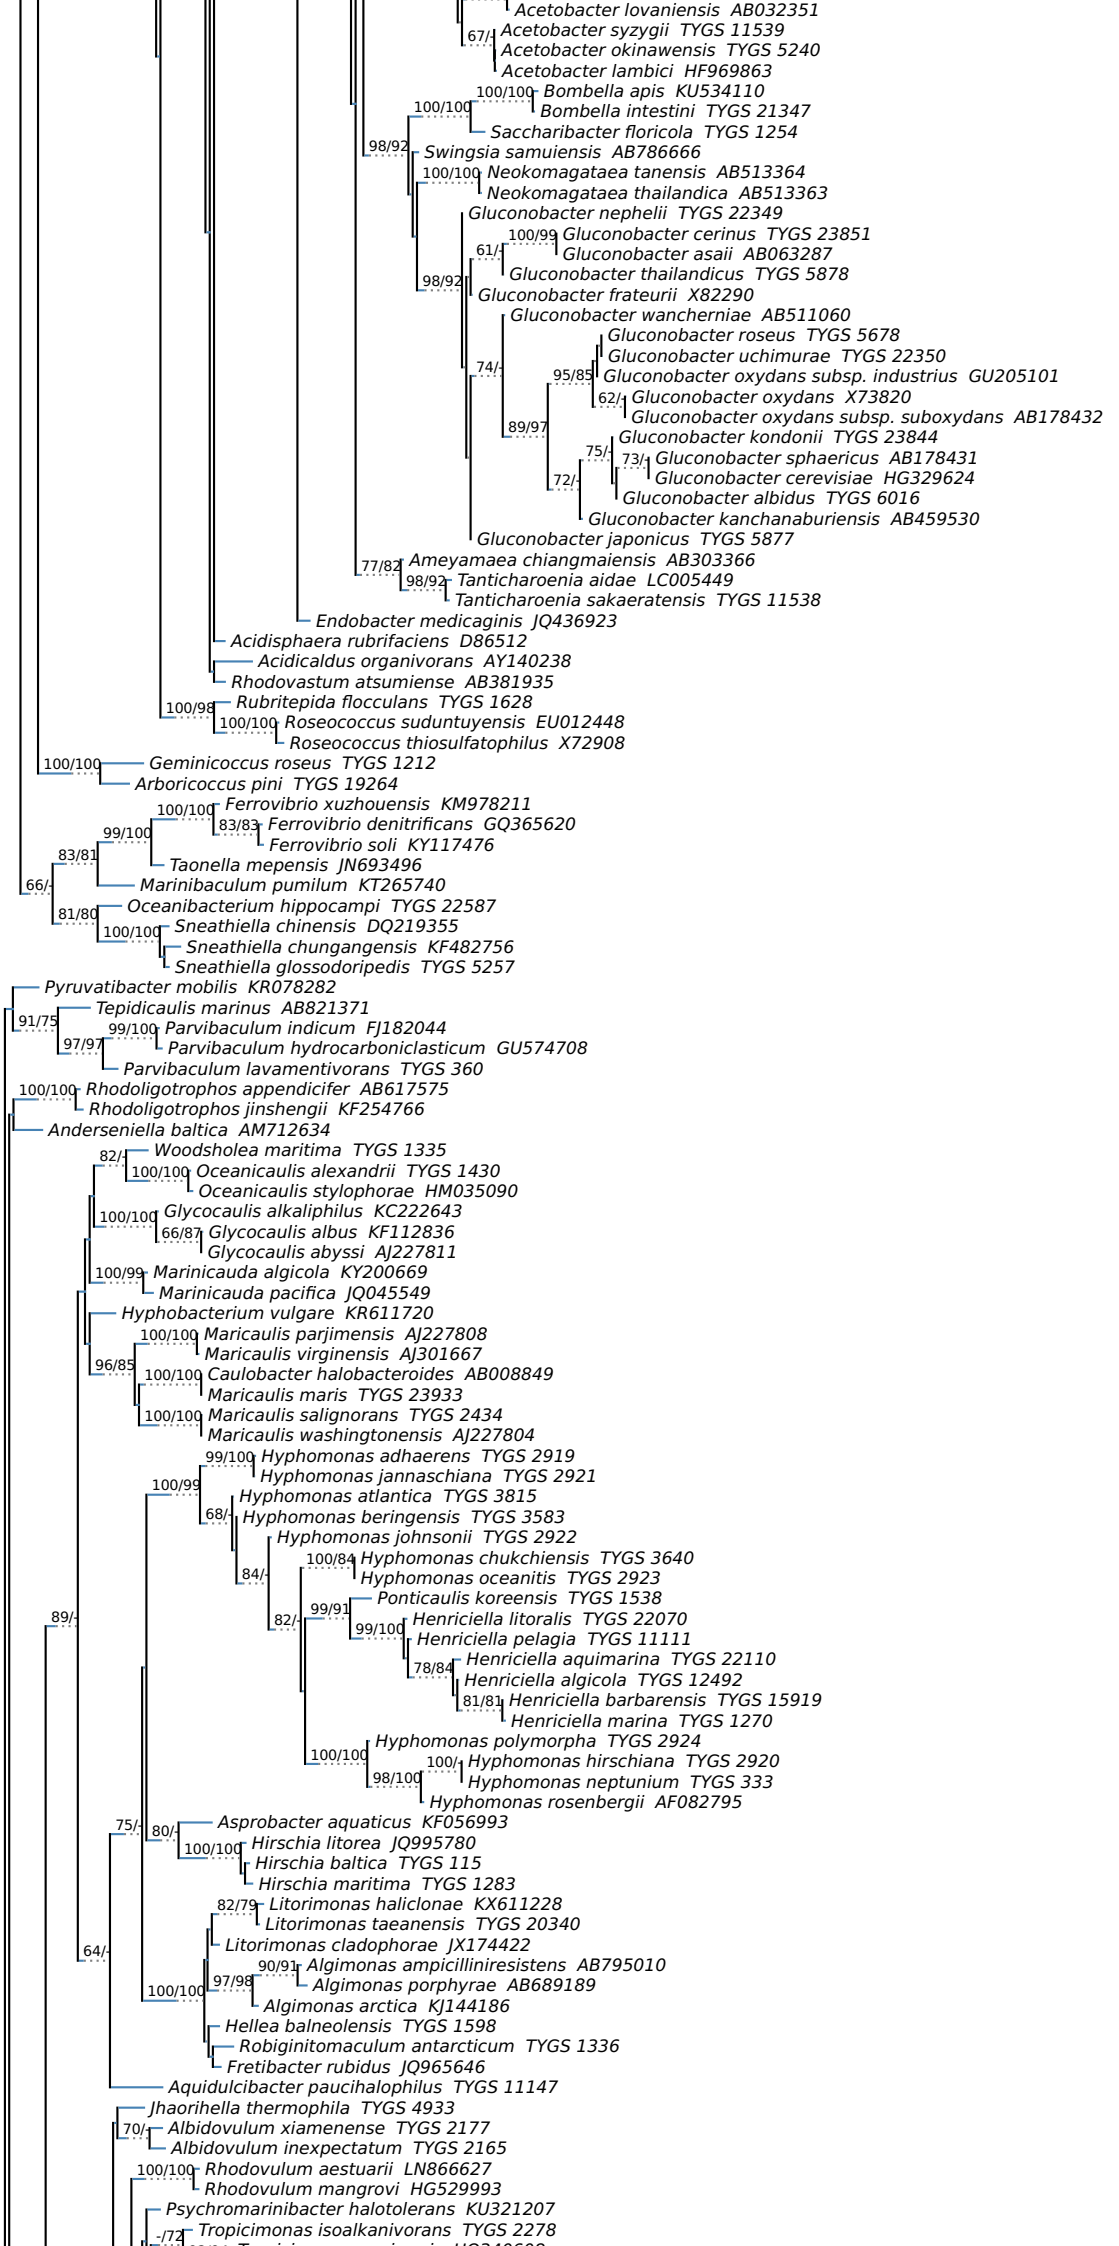

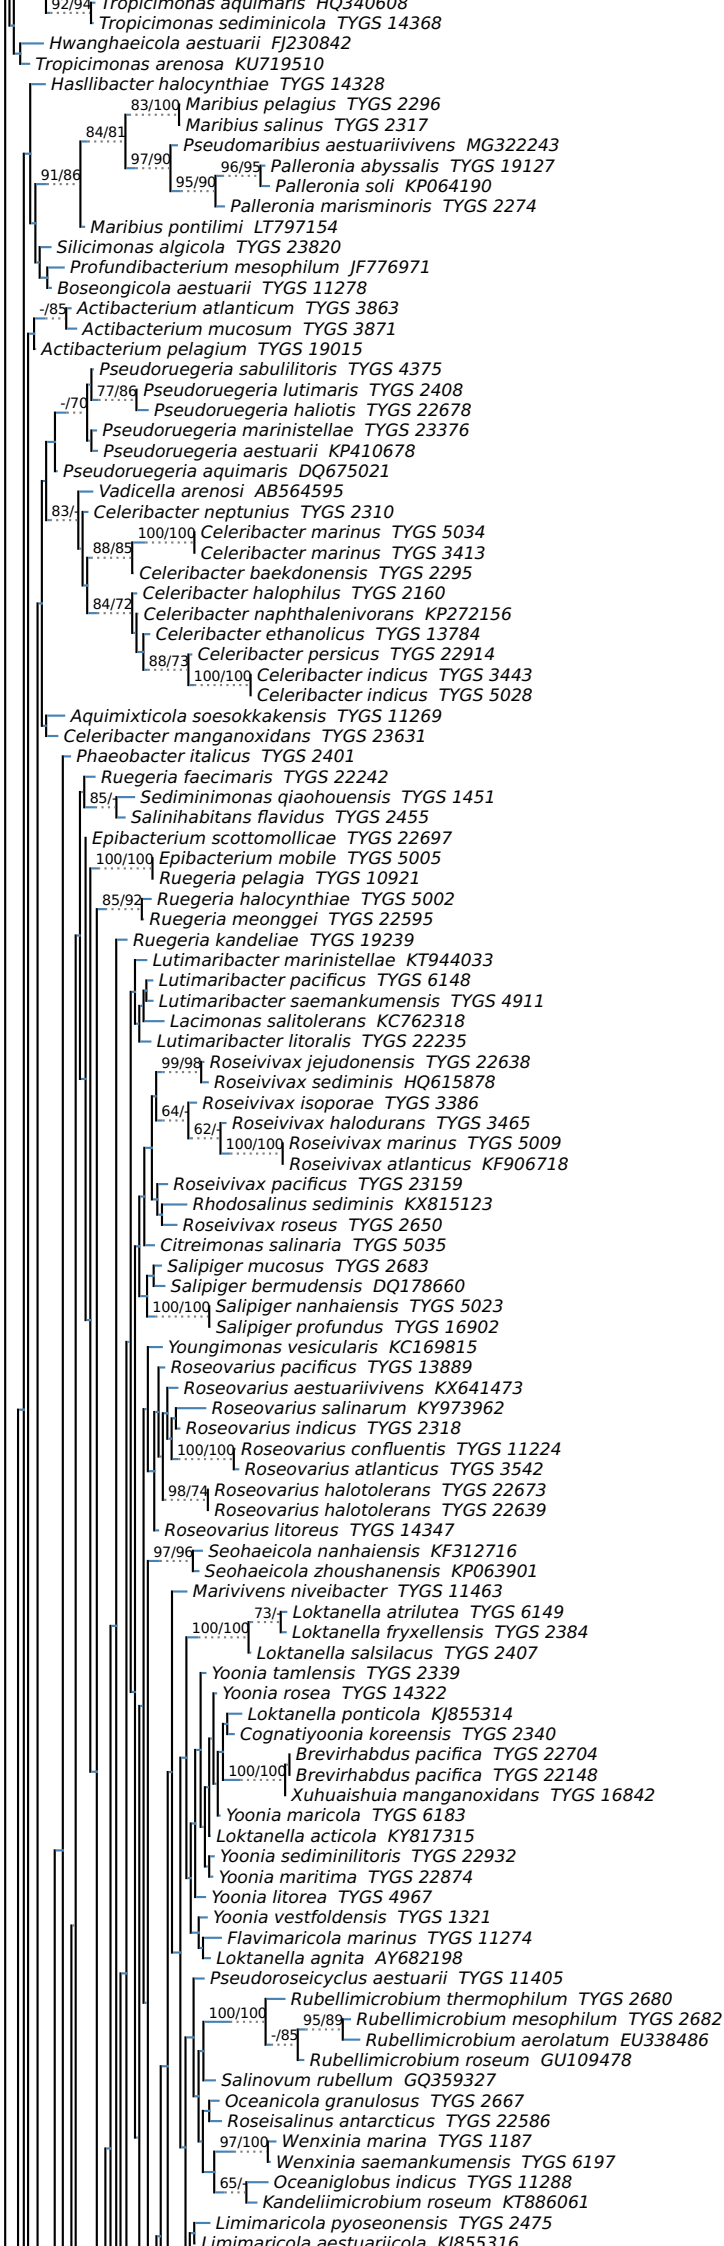

Limimarinicola cinnabarinus TYGS 2676  
 65/65 Limimarinicola hongkongensis TYGS 1219  
 81/79 Limimarinicola soesokkakensis TYGS 22683  
 Limimarinicola variabilis KJ569528  
 Marivivens donghaensis KT282004  
 100/100 Ketogulonicigenium vulgare AF136849  
 Ketogulonicigenium robustum AF136850  
 Mangrovicoccus ximenensis KY012060  
 Poseidonocella sedimentorum TYGS 2425  
 Poseidonocella pacifica TYGS 4972  
 Roseivivax halotolerans TYGS 4907  
 Roseivivax lentus TYGS 14273  
 Yangia pacifica TYGS 2316  
 83/83 Donghicola eburneus TYGS 4949  
 Donghicola tyrosinivorans TYGS 22875  
 Pseudodonghicola xiamenensis TYGS 1519  
 Cribrihabitans marinus TYGS 5001  
 96/96 Cribrihabitans pelagius LC101916  
 Cribrihabitans neustonicus KF582605  
 Ruegeria marina TYGS 5985  
 Ruegeria pomeroyi AF098491  
 Ruegeria denitrificans TYGS 19251  
 Ruegeria profundus TYGS 18950  
 100/98 Ruegeria conchae TYGS 22934  
 Ruegeria conchae TYGS 2687  
 Ruegeria arenilitoris JQ807219  
 100/100 Ruegeria atlantica TYGS 10956  
 Agrobacterium meteoris TYGS 3714  
 74/83 Ruegeria marisrubri TYGS 11234  
 Ruegeria intermedia TYGS 6159  
 100/82 Ruegeria lacuscaerulensis TYGS 6199  
 Ruegeria lacuscaerulensis TYGS 2686  
 Tritonibacter horisontis TYGS 11422  
 100/100 Pseudophaeobacter arcticus TYGS 2663  
 70/70 Pseudophaeobacter leonis TYGS 21984  
 Phaeobacter porticola TYGS 11015  
 Phaeobacter piscinae AJ536669  
 Phaeobacter inhibens TYGS 2662  
 Phaeobacter gallaeciensis TYGS 2677  
 Paraphaeobacter pallidus KU315483  
 Salipiger thiooxidans TYGS 2282  
 Salipiger aestuarii TYGS 2276  
 100/100 Salipiger manganoxidans KC534242  
 Salipiger marinus EU928765  
 95/96 Leisingera methylohalidivorans TYGS 1016  
 Leisingera aquimarina TYGS 2664  
 Seohaecicola saemankumensis EU221274  
 67/67 Sedimentitalea nanhaiensis TYGS 2660  
 Sedimentitalea todarodis KP172215  
 100/100 Puniceibacterium confluentis KY614065  
 70/70 Puniceibacterium antarcticum TYGS 23878  
 Puniceibacterium sediminis TYGS 22238  
 Leisingera aquaemixtae TYGS 3488  
 Leisingera daeponensis TYGS 2661  
 Leisingera caerulea TYGS 2659  
 74/81 Thalassobius activus CYTO01000011  
 Cognatishimia maritima TYGS 2305  
 Nereida ignava AJ748748  
 Tateyamaia pelophila AJ968651  
 Tateyamaia omphalii AB193438  
 Planktomarina temperata TYGS 2685  
 Aestuariibius insulae MG641160  
 Pseudooctadecabacter jejudonensis TYGS 11256  
 Octadecabacter ponticola KX073749  
 83/82 95/97 Octadecabacter antarcticus TYGS 994  
 Octadecabacter arcticus TYGS 995  
 89/94 91/91 Octadecabacter ascidiaceicola TYGS 11264  
 100/100 Octadecabacter temperatus TYGS 14361  
 Octadecabacter temperatus TYGS 3450  
 Cognatiyoonia sediminum TYGS 6187  
 Thalassobius litorarius KP410684  
 Tropicibacter phthalicus TYGS 22935  
 Aestuariicoccus marinus MF113251  
 Marinovum algicola TYGS 2281  
 Primorskyibacter aestuariivivens KX578605  
 Primorskyibacter sedentarius TYGS 6494  
 Primorskyibacter insulae TYGS 19129  
 Thalassococcus halodurans TYGS 2309  
 Thalassococcus lentus JX090308  
 Aestuariihabitans beolgyonensis KC577450  
 64/64 Pseudoseohaecicola caenipelagi KP219887  
 100/100 Sulfitobacter pseudonitzschiae TYGS 6166  
 Sulfitobacter pseudonitzschiae TYGS 3416  
 Sulfitobacter aestuarii MG210570  
 85/73 68/68 Sulfitobacter indolifex TYGS 2671  
 Sulfitobacter delicatus TYGS 2461  
 90/86 Sulfitobacter dubius TYGS 2292  
 Sulfitobacter faviae KT444698  
 Sulfitobacter porphyrae AB758574  
 Sulfitobacter brevis TYGS 2319  
 Sulfitobacter pontiacus TYGS 2345  
 Sulfitobacter marinus TYGS 2338  
 Sulfitobacter litoralis TYGS 2380  
 Sulfitobacter mediterraneus TYGS 22937  
 Pelagimonas varians TYGS 22912  
 Roseobacter ponti KX756455  
 87/67 100/100 Roseobacter denitrificans TYGS 362  
 Roseobacter denitrificans TYGS 4998  
 85/84 Roseobacter litoralis TYGS 363  
 76/66 Sulfitobacter pacificus AB934383  
 93/92 63/63 Sulfitobacter noctilucicola TYGS 3749  
 Sulfitobacter noctilucae TYGS 3435  
 Sulfitobacter geojensis TYGS 3601  
 84/89 Sulfitobacter undariae KM275624  
 Sulfitobacter donghicola TYGS 3669  
 Sulfitobacter guttiformis TYGS 22973  
 Epibacterium multivorans TYGS 2272  
 Tropicibacter naphthalenivorans AB302370  
 Marimonas arenaosa KU671052  
 Aquicoccus porphyridii MF113254

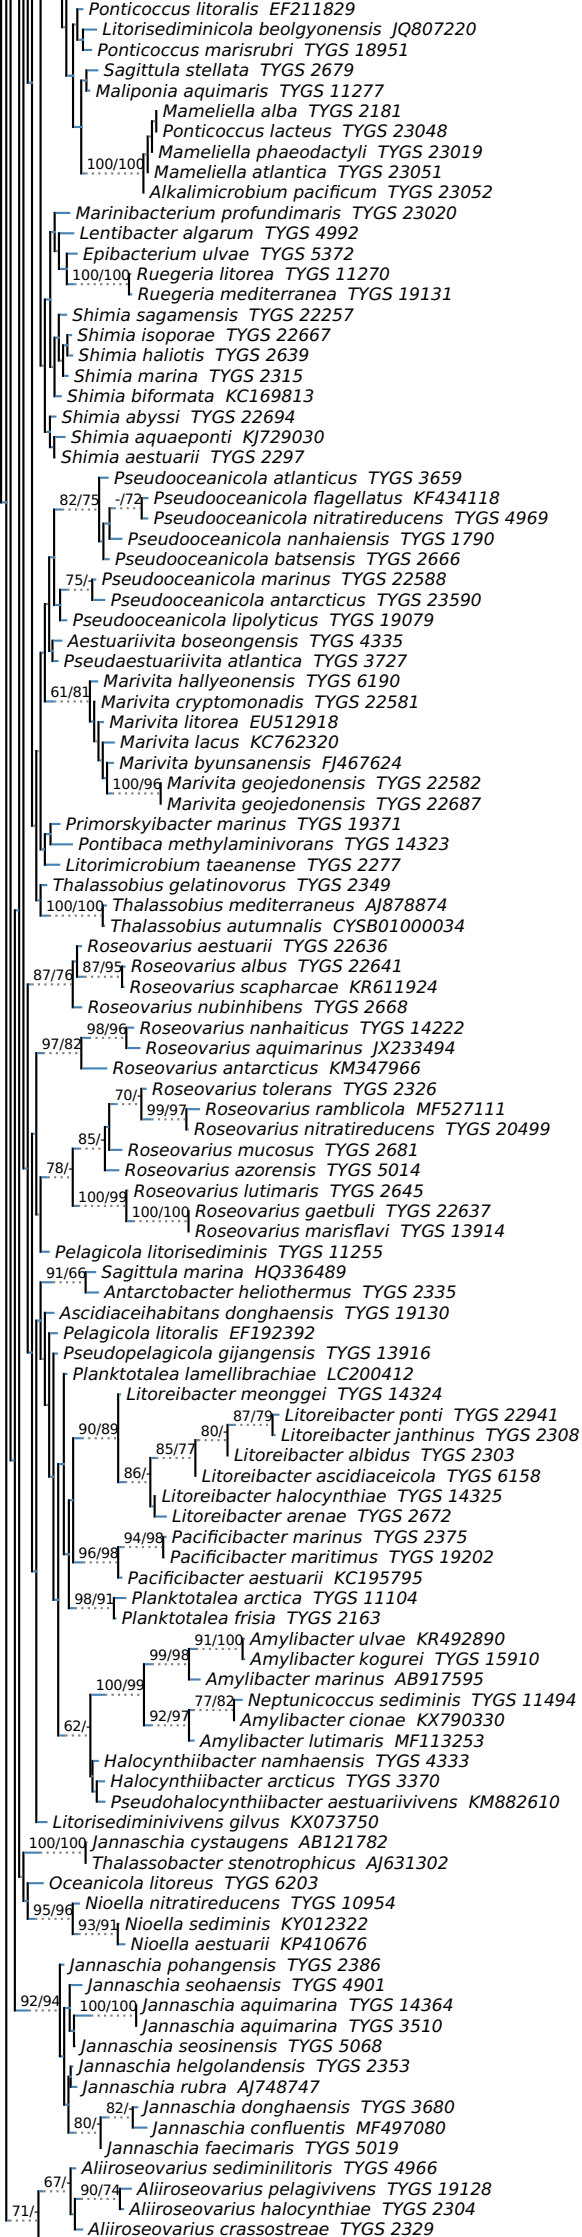

100/100

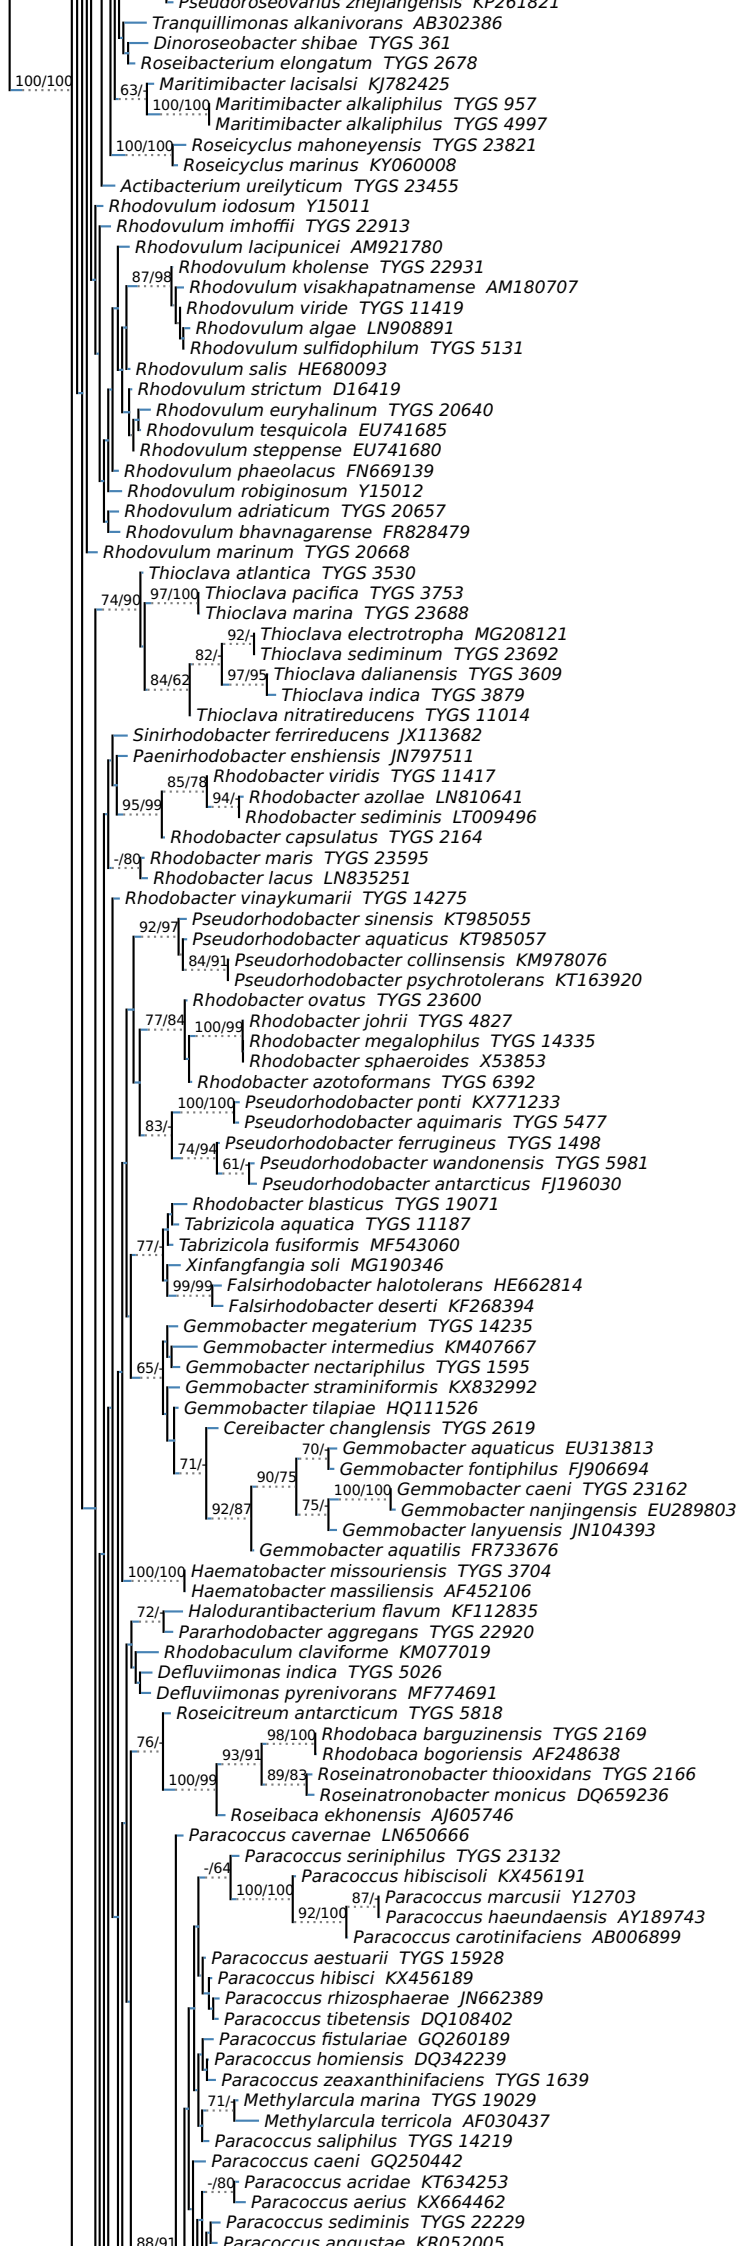

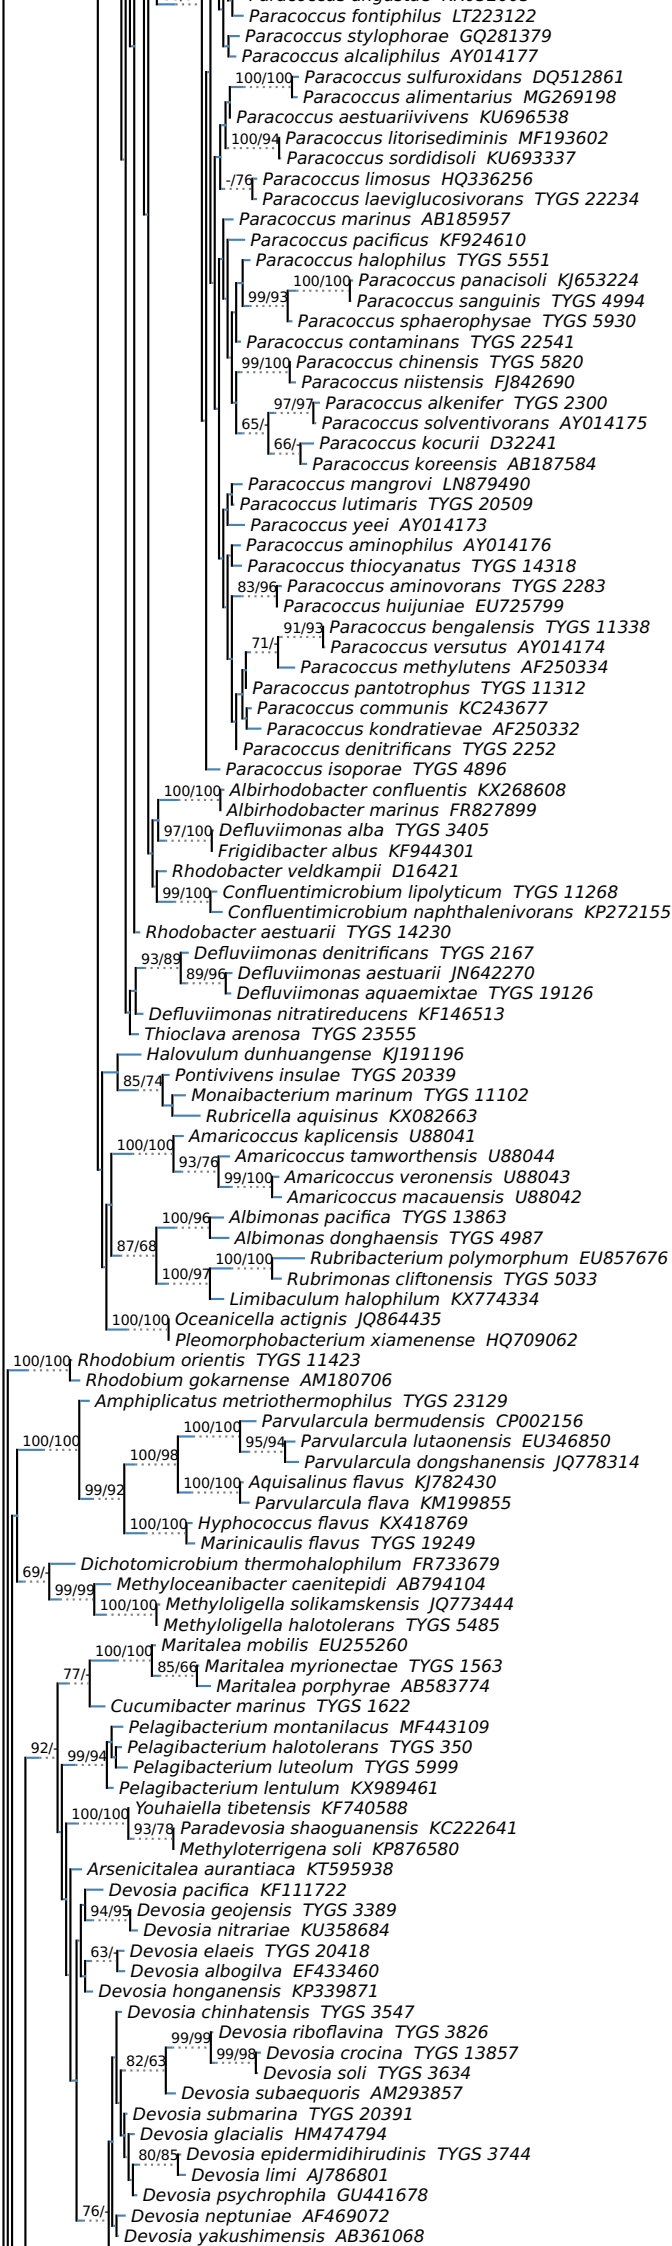

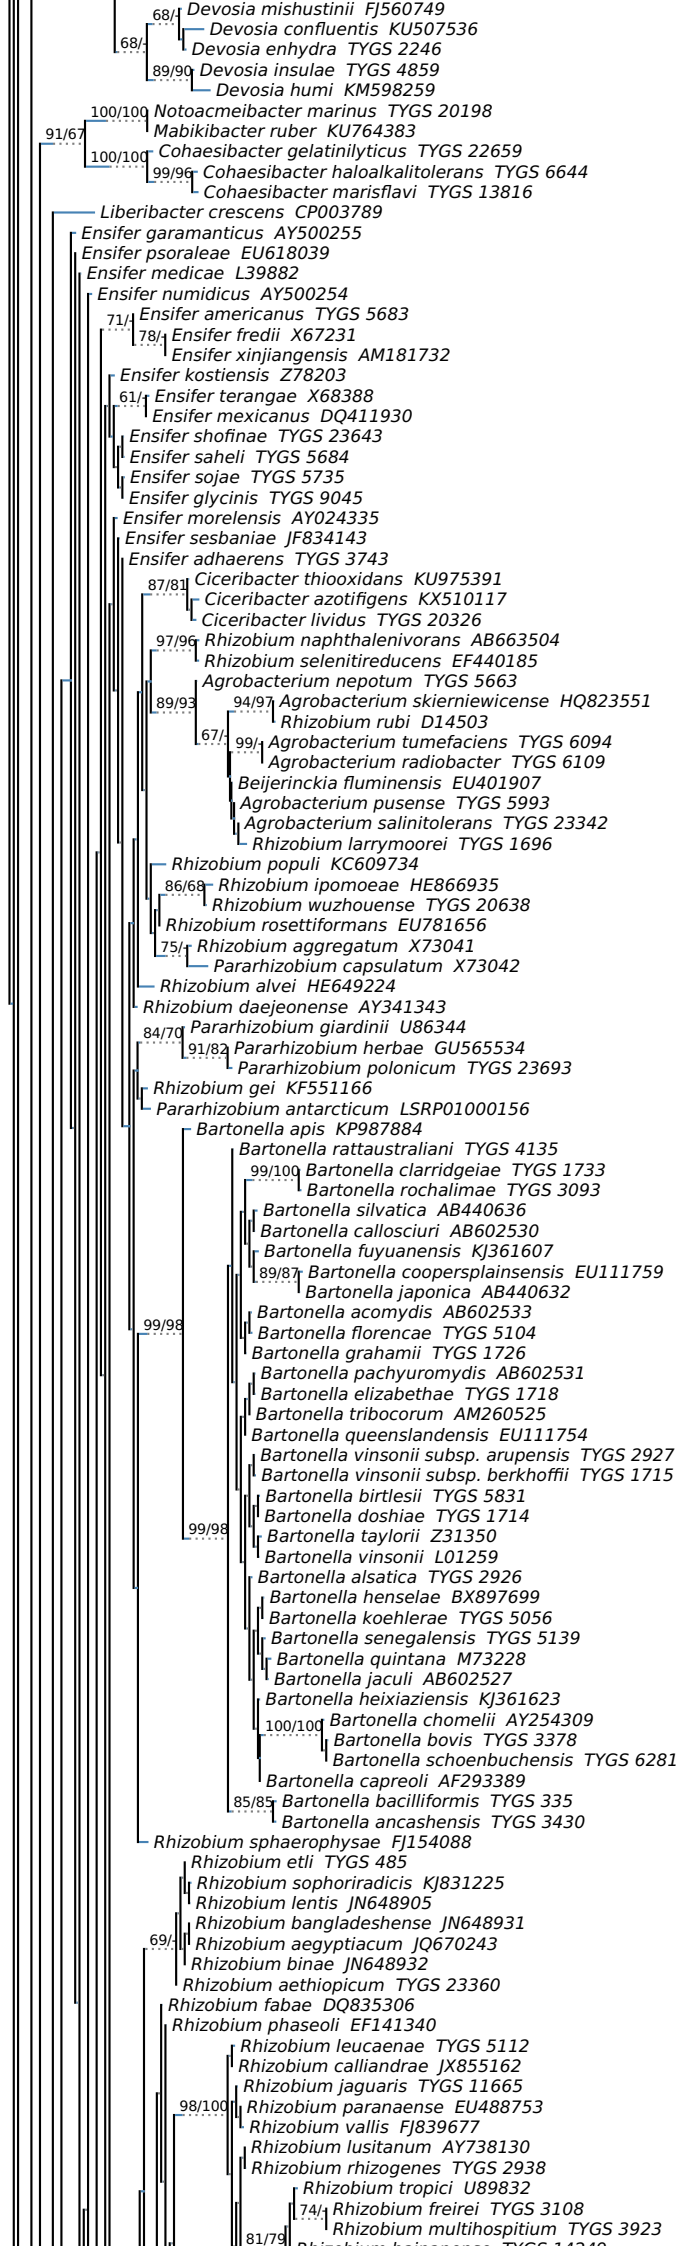

*Rhizobium hainanense* TYGS 14249  
*Rhizobium miluonense* TYGS 3936  
*Rhizobium mayense* JX855172  
95/1 *Rhizobium laguerreae* JN558651  
*Rhizobium trifolii* AY509900  
99/95 *Rhizobium sophorae* KJ831229  
*Rhizobium leguminosarum* TYGS 21436  
97/1 *Rhizobium anhuiense* JQ585825  
*Rhizobium acidisoli* KJ921033  
*Rhizobium tubonense* TYGS 20459  
*Rhizobium ecuadorensis* JN129381  
*Rhizobium pisi* AY509899  
*Rhizobium esperanzae* MXP01000055  
*Rhizobium endophyticum* EU867317  
*Rhizobium metallidurans* JX678769  
-68 *Rhizobium cauense* JQ308326  
*Rhizobium mesoamericanum* JF424606  
*Rhizobium altiplani* TYGS 23849  
99/96 *Rhizobium favelukesii* TYGS 16641  
*Rhizobium tibeticum* TYGS 10952  
*Rhizobium grahamii* TYGS 3095  
87/1 *Rhizobium mesosinicum* DQ100063  
*Rhizobium alamii* AM931436  
*Rhizobium viscosum* AJ639832  
*Rhizobium yanglingense* AF003375  
*Rhizobium gallicum* U86343  
*Rhizobium indigoferae* AF364068  
73/1 *Rhizobium mongolense* TYGS 4186  
*Rhizobium loessense* TYGS 5413  
*Rhizobium azibense* JN624691  
*Rhizobium sullae* Y10170  
*Rhizobium pakistanense* AB854065  
*Rhizobium oryzicola* JX446583  
*Rhizobium lemnae* AB738386  
*Rhizobium rhizoryzae* EF649779  
67/1 *Rhizobium petrolearium* EU556969  
*Rhizobium puerariae* LC014930  
*Rhizobium helianthi* JQ032629  
88/84 *Allorhizobium pseudoryzae* DQ454123  
*Rhizobium straminoryzae* KF444510  
*Rhizobium paknamense* AB733647  
*Allorhizobium oryzae* EU056823  
*Martelella radialis* KF560339  
100/100 *Martelella mangrovi* KF560340  
*Martelella suaedae* KR233159  
86/79 *Martelella limonii* KR233160  
*Martelella mediterranea* AY649762  
*Martelella endophytica* HM800924  
*Aureimonas rubiginis* JQ864241  
*Aureimonas endophytica* KX898583  
*Aureimonas ferruginea* JQ864240  
100/100 *Aurantimonas manganooxydans* TYGS 956  
*Aurantimonas coralicida* TYGS 1418  
*Consotaela salsifontis* KC807165  
95/93 *Fulvimarina manganooxydans* TYGS 21949  
*Fulvimarina pelagi* TYGS 2925  
*Aureimonas populi* KP861644  
*Aureimonas glaciei* KU253627  
*Mangroviella endophytica* TYGS 11592  
83/86 *Aureimonas frigidaquae* TYGS 19272  
*Aureimonas altamirensis* TYGS 2004  
77/83 *Aurantimonas endophytica* KM114215  
96/93 *Aurantimonas aggregata* KY984095  
*Jiella aquimaris* KJ620984  
*Aureimonas glaciastagni* KM273177  
100/100 *Aureimonas galii* KT326766  
61/1 *Aureimonas pseudogalii* KT806079  
*Aureimonas jatrophae* JQ346805  
*Aureimonas ureilytica* TYGS 1160  
*Aureimonas phyllosphaerae* JQ346806  
*Rhizobium capsici* HQ113369  
*Rhizobium tarimense* HM371420  
*Neorhizobium huautlense* TYGS 11282  
*Neorhizobium alkalisoli* TYGS 18998  
83/79 *Neorhizobium galegae* TYGS 3816  
*Rhizobium vignae* GU128881  
100/100 *Rhizobium marinum* TYGS 16877  
*Pseudorhizobium pelagicum* JOKI01000038  
98/99 *Allorhizobium vitis* U45329  
87/86 *Rhizobium taibaishanense* HM776997  
*Allorhizobium undicola* TYGS 1803  
*Rhizobium oryziradicis* KX129901  
*Rhizobium smilacinae* KF551141  
*Rhizobium wenxiniae* KR610521  
69/1 *Rhizobium zeae* KX932068  
*Rhizobium cellulosilyticum* DQ855276  
*Rhizobium yangtingense* KC934840  
89/81 *Rhizobium endolithicum* HE818072  
*Rhizobium flavum* TYGS 20154  
*Rhizobium soli* EF363715  
*Rhizobium arenae* TYGS 11023  
*Gellertiella hungarica* LN651200  
61/1 *Rhizobium halophytocola* GU322905  
66/1 *Rhizobium azoosidifex* LN832063  
*Allorhizobium borbori* EF125187  
*Rhizobium subbaraonis* TYGS 23599  
*Shinella pollutisoli* KY054581  
85/73 *Shinella kummerowiae* EF070131  
82/75 *Shinella zoogloeoides* AB238789  
*Shinella granuli* AY995149  
*Shinella curvata* LT545981  
64/1 *Shinella fusca* FM177879  
64/1 *Shinella daejeonensis* GQ241319  
*Shinella yambaruensis* AB285481  
*Mycoplana dimorpha* TYGS 23677  
*Ochrobactrum endophyticum* KP721485  
*Daeguia caeni* EF532794  
*Ochrobactrum lupini* AY457038  
-74 *Ochrobactrum tritici* AJ242584  
*Ochrobactrum cytisi* AY776289  
92/92 *Ochrobactrum anthroni* CP000758

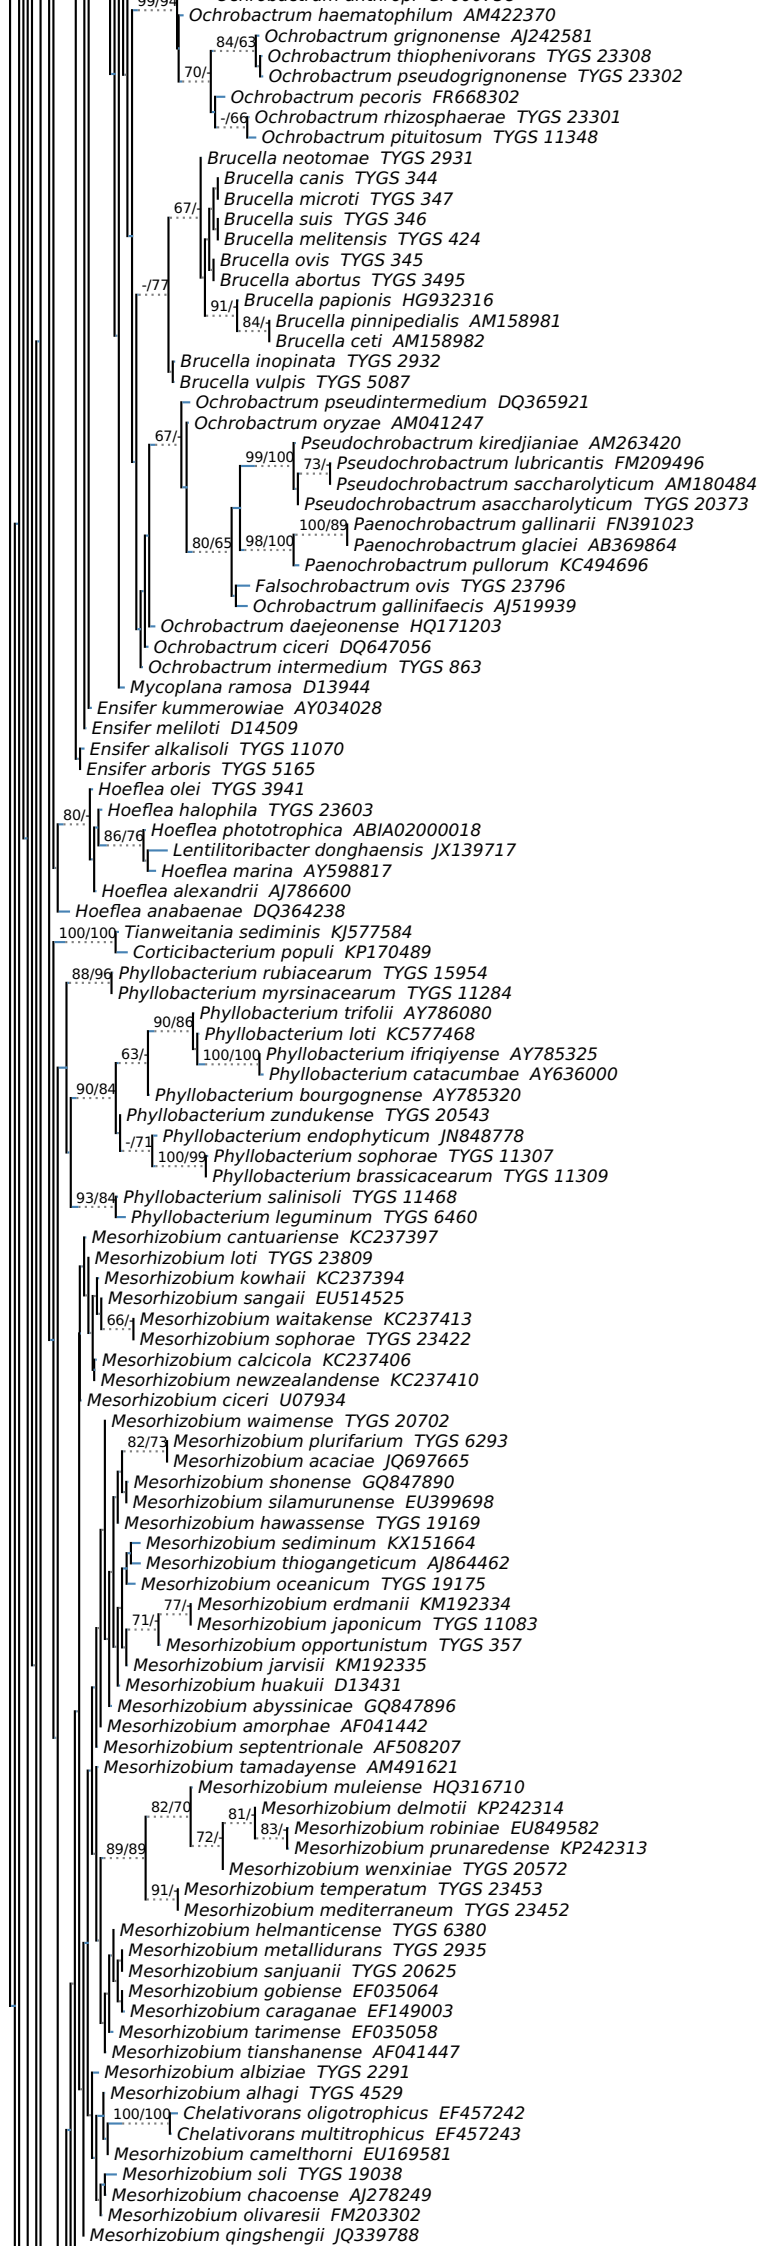

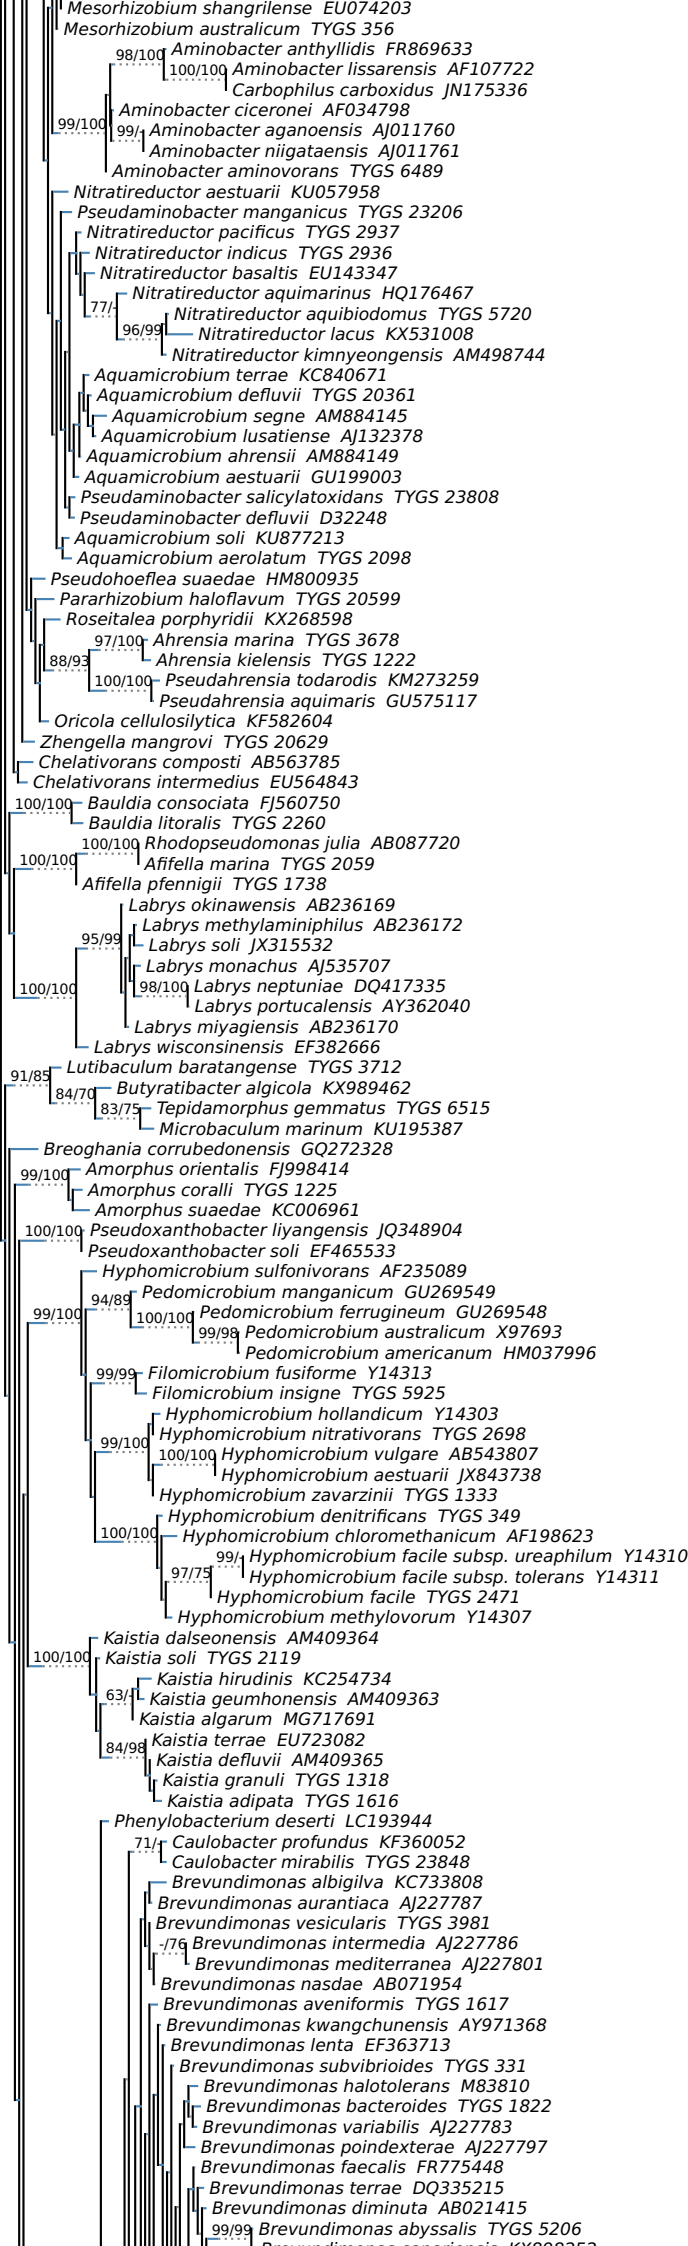

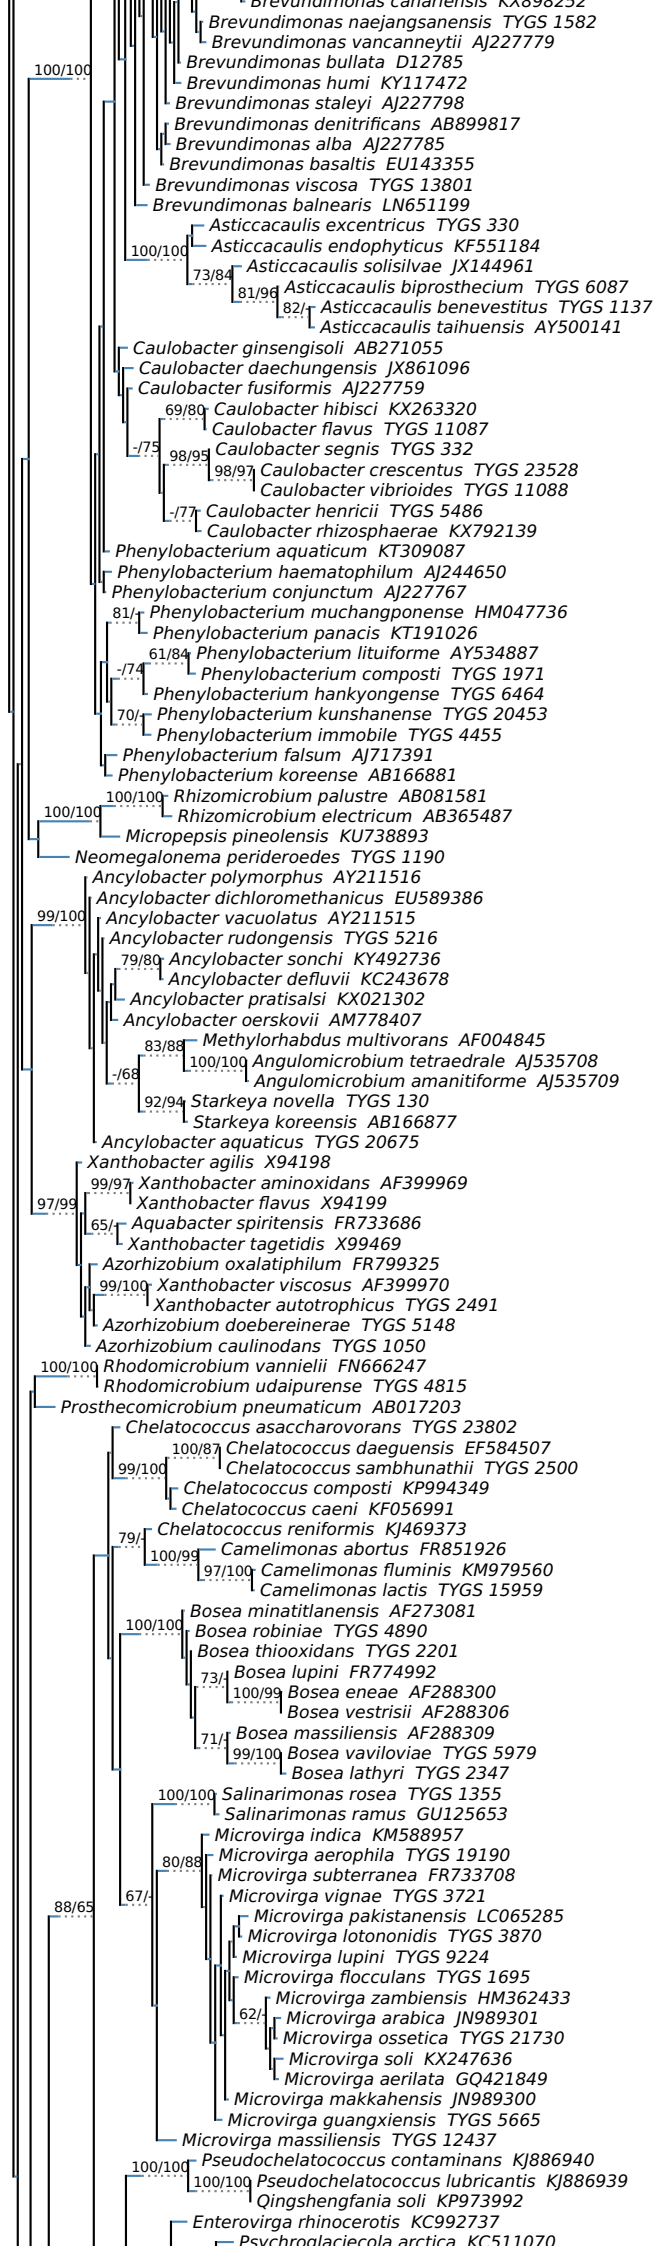

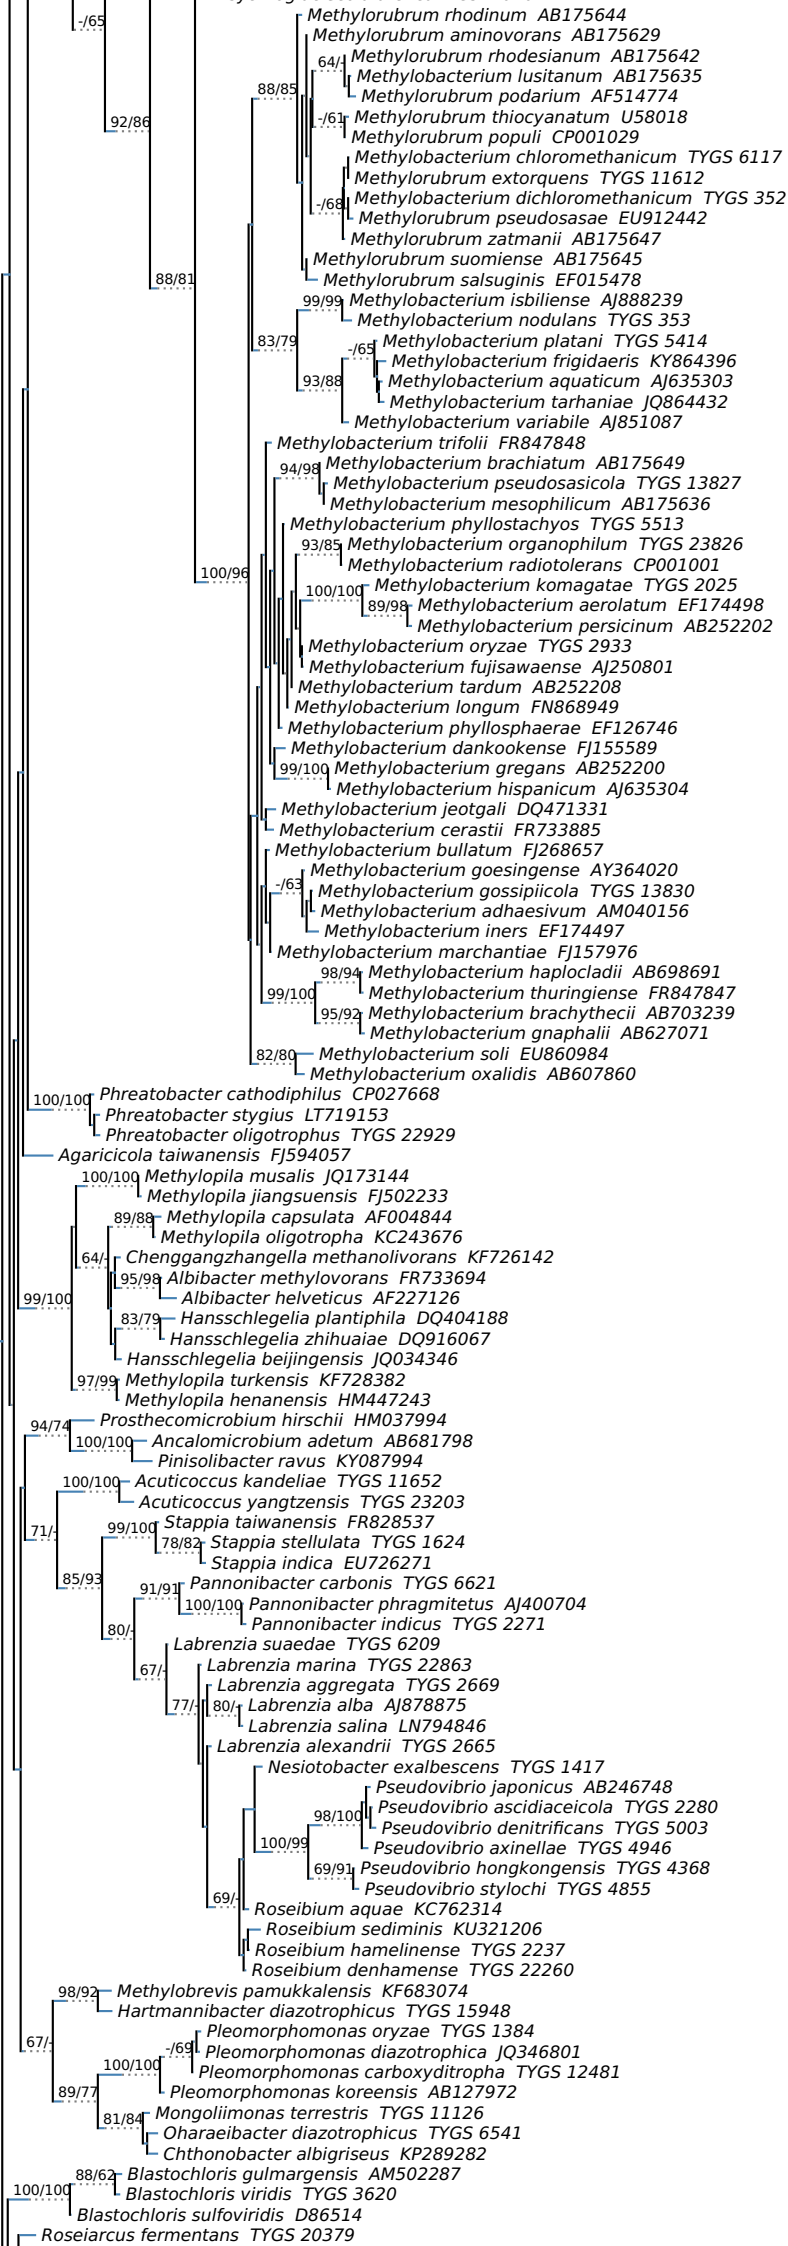

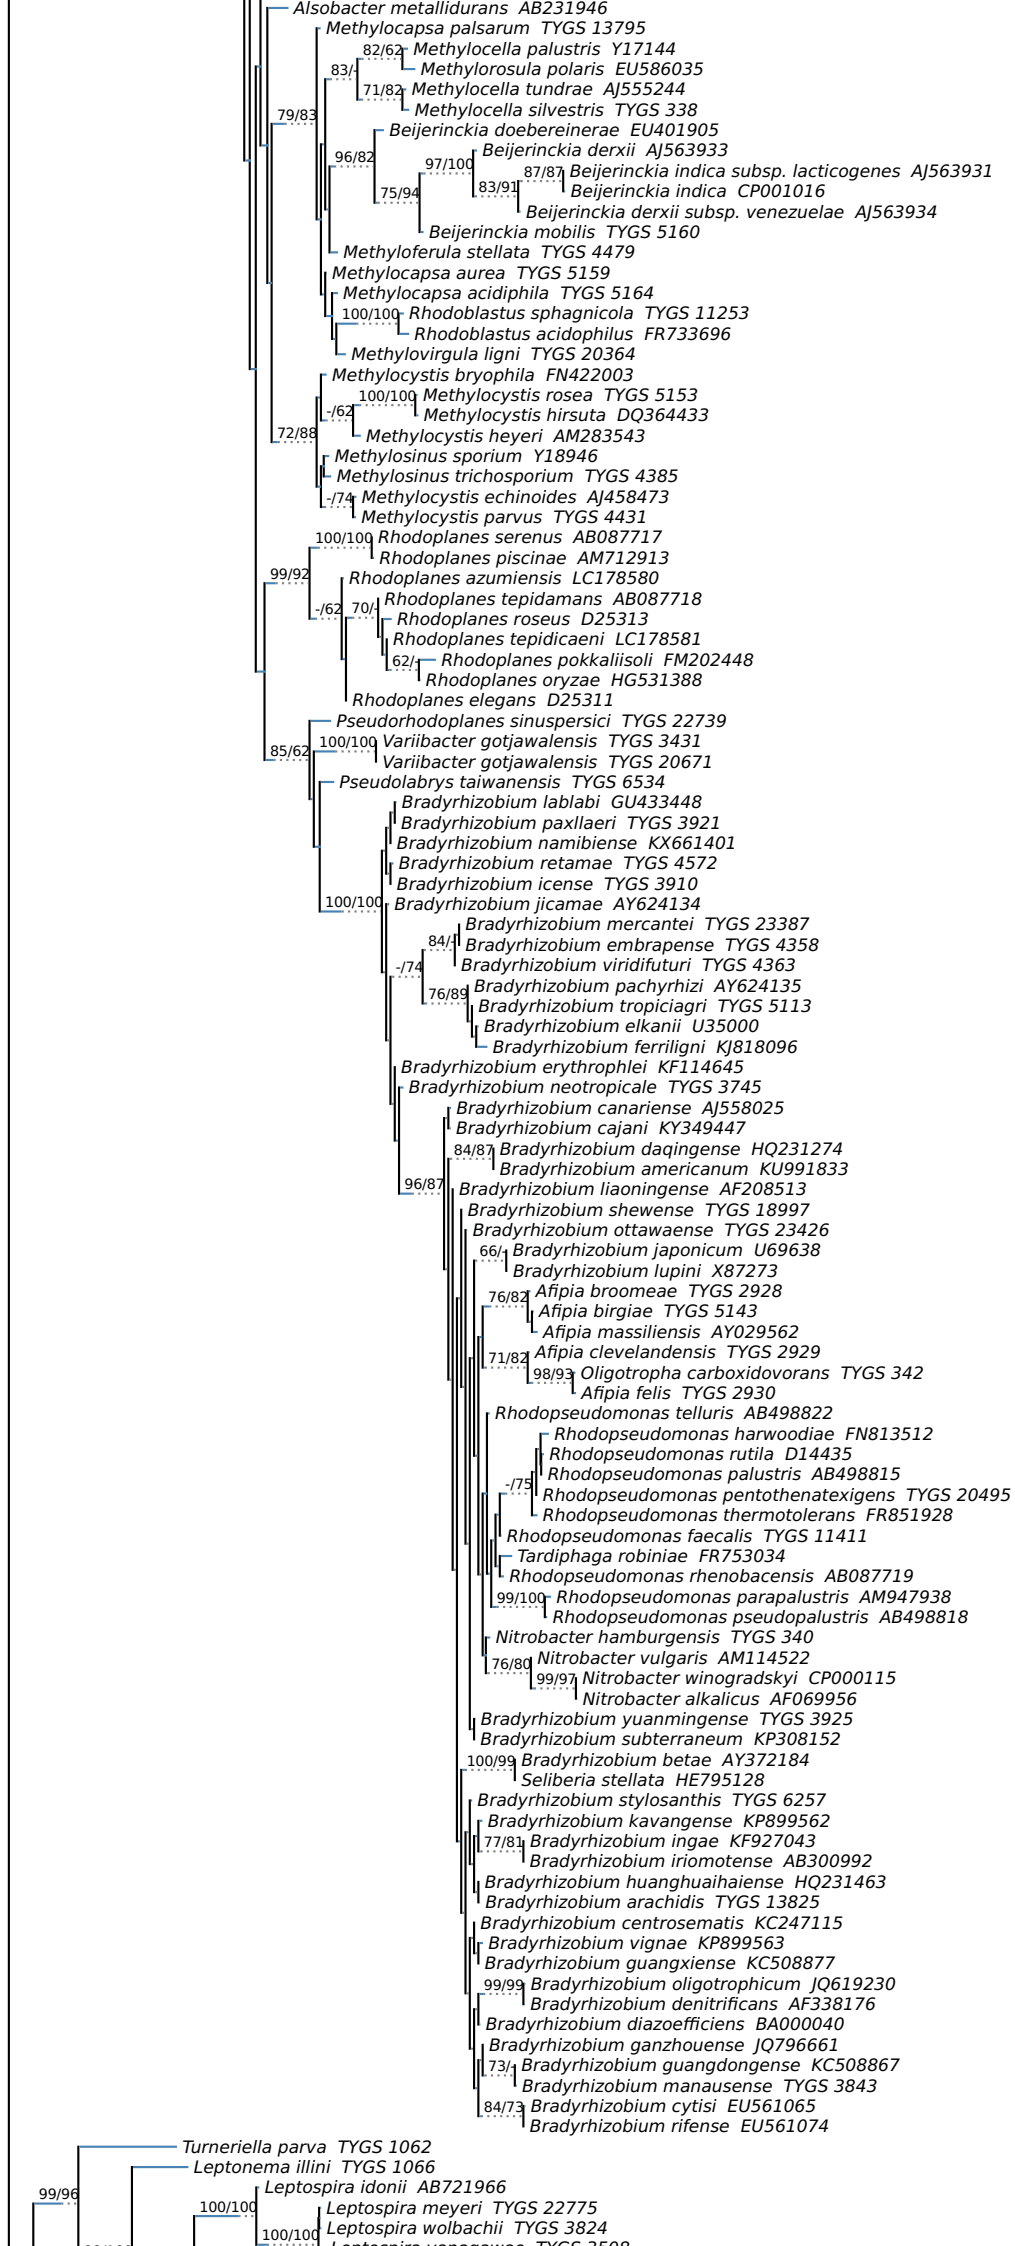

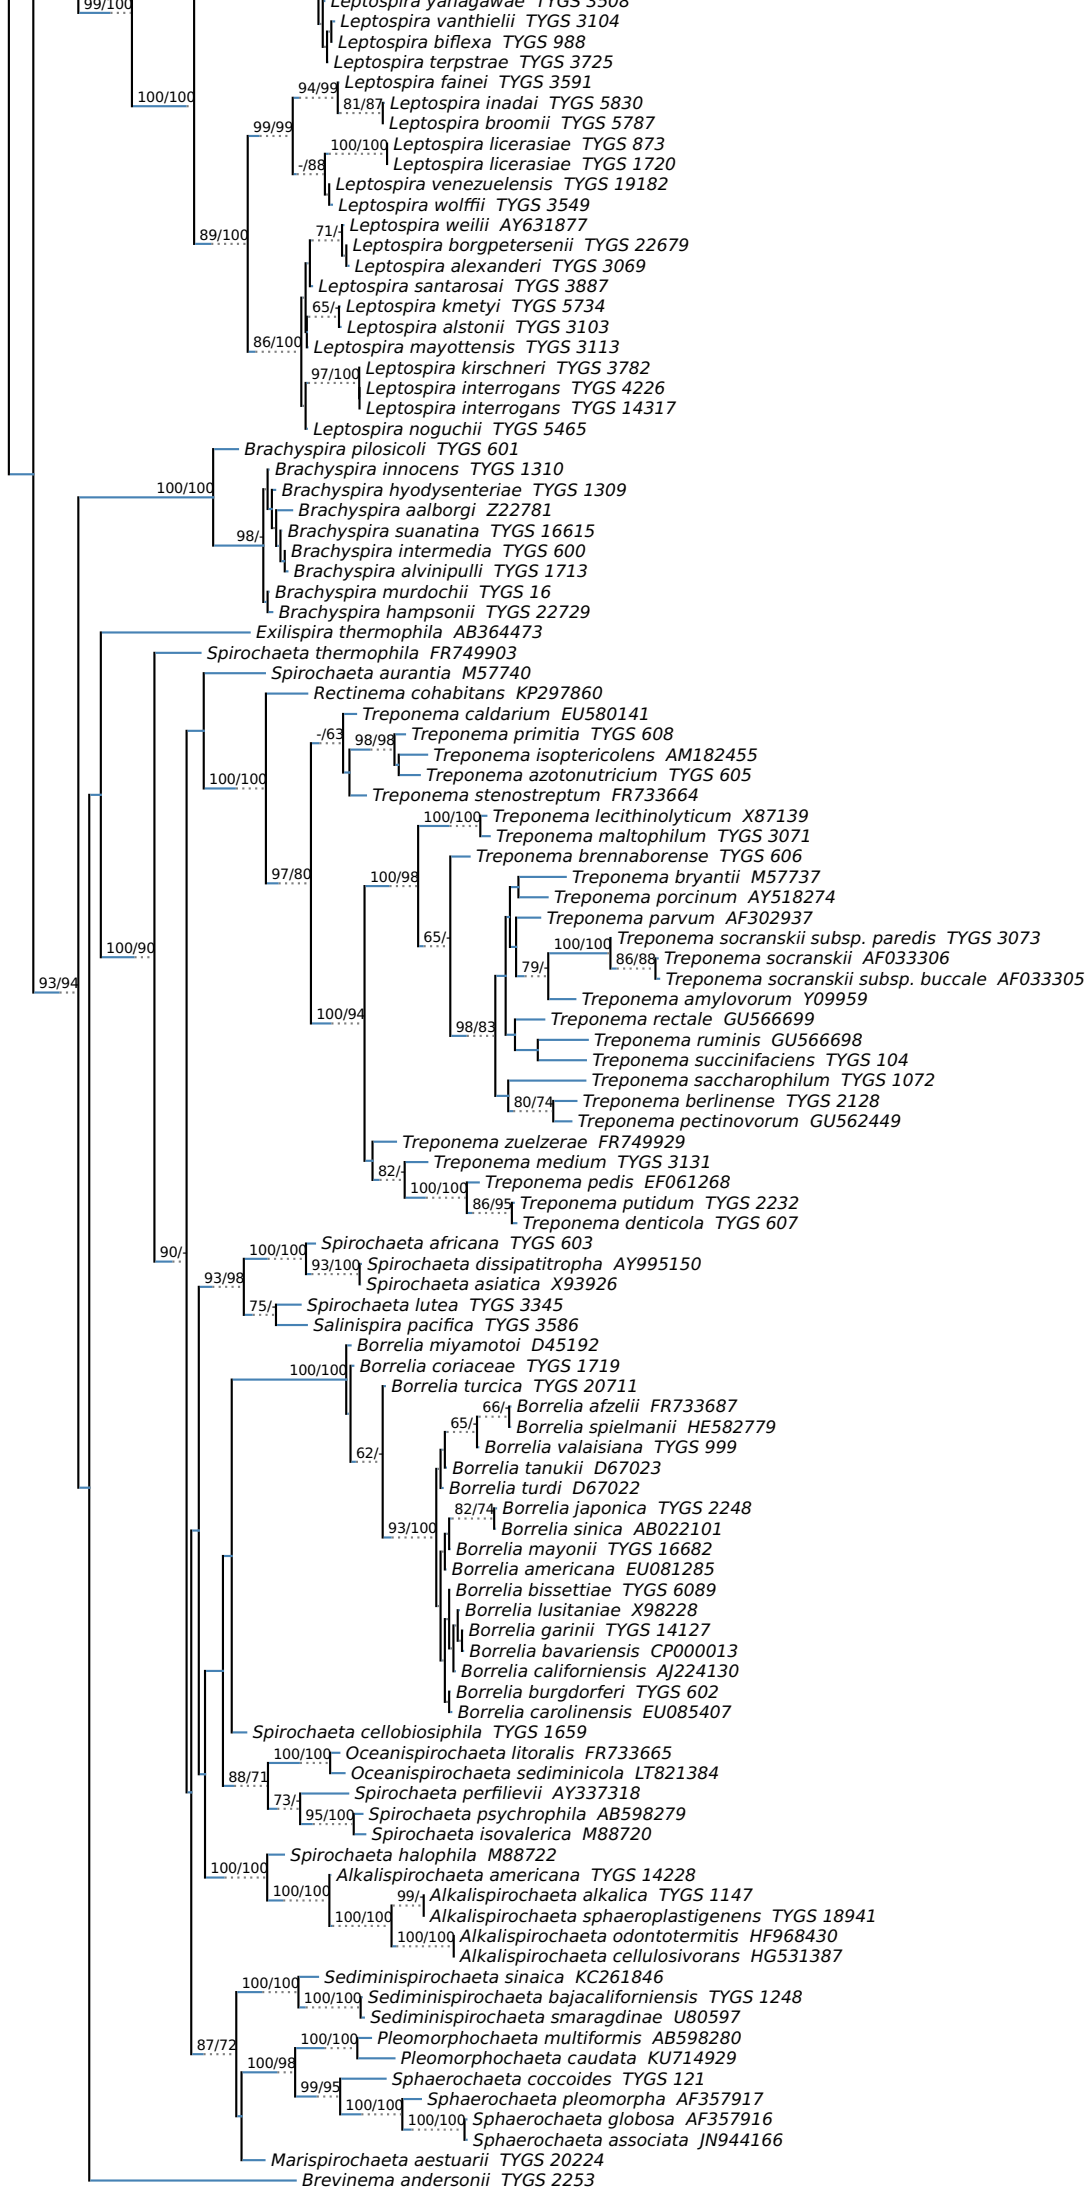

0.25

Figure 3: Unconstrained comprehensive 16S rRNA gene ML tree (UCT) of *Alphaproteobacteria* inferred under the GTR+CAT model. The branches are scaled in terms of the expected number of substitutions per site. The numbers above the branches are support values when larger than 60% from ML (left) and MP (right) bootstrapping. Dotted parts of branches are filled in to allow proper placement of bootstrap values and are not part of the actual branch length. Numbers preceded by the term 'TYGS' in labels refer to the genome IDs as found in Supplementary Table S1 (first sheet). Each tip label ends with the family of the respective taxon.

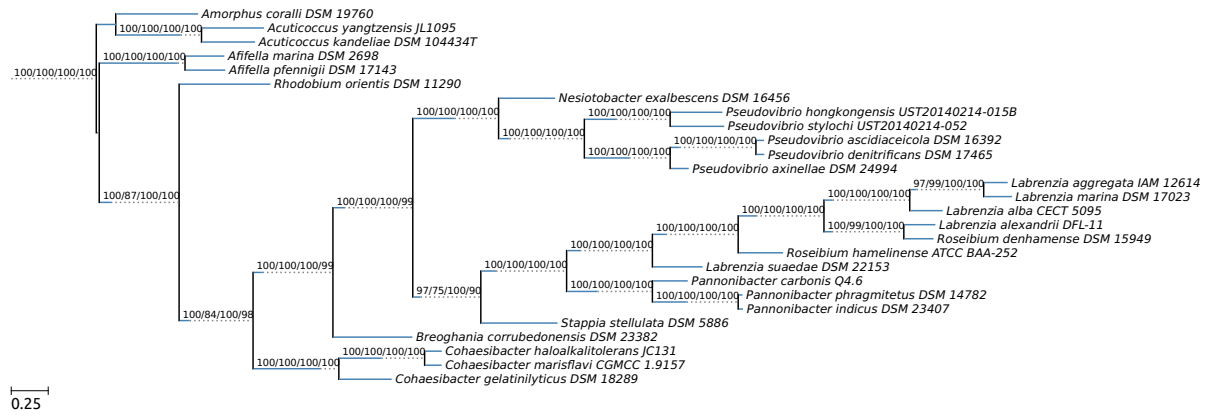

Figure 4: Phylogenetic tree inferred with RAxML from the *Labrenzia* supermatrix including single-copy core genes. Branches are scaled in terms of the expected number of changes per site. The first two numbers above branches (left to right) are partition bootstrap support values from (i) RAxML (ML) analysis and (ii) TNT (MP) analysis of the supermatrix that included single-copy genes that occurred in all of the genomes. The last two numbers above branches are partition bootstrap support values from (iii) RAxML (ML) analysis and (iv) TNT (MP) analysis of the supermatrix that included single-copy genes that occurred in at least four of the genomes.

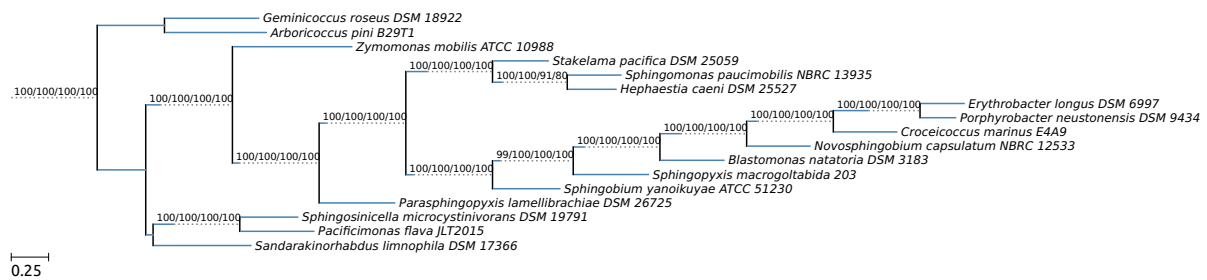

Figure 5: Phylogenetic ML tree inferred with RAxML from the *Sphingomonadales* supermatrix including single-copy core genes. Branches are scaled in terms of the expected number of changes per site. The first two numbers above branches (left to right) are partition bootstrap support values from (i) RAxML (ML) analysis and (ii) TNT (MP) analysis of the supermatrix that included single-copy genes that occurred in all of the genomes. The last two numbers above branches are partition bootstrap support values from (iii) RAxML (ML) analysis and (iv) TNT (MP) analysis of the supermatrix that included single-copy genes that occurred in at least four of the genomes.
